# Supplementary material for: Assessing radiomic feature robustness to interpolation in 18F-FDG PET imaging
Source: PubMed Central journal article supplement (PMC6609613; doi:10.1038/s41598-019-46030-0), 2019-07-04
Supplement: 41598_2019_46030_MOESM1_ESM.pdf [file 41598_2019_46030_MOESM1_ESM.pdf]

Supplementary materials:

*‘Assessing radiomic feature robustness to interpolation in  $^{18}\text{F}$ -FDG  
PET imaging’*

Philip Whybra\*<sup>1</sup>, Craig Parkinson<sup>1</sup>, Kieran Foley<sup>2</sup>, John Staffurth<sup>2</sup>, and Emiliano Spezi<sup>1,2</sup>

Corresponding author\* (whybrap@cardiff.ac.uk)

<sup>1</sup> School of Engineering, Cardiff University, United Kingdom

<sup>2</sup> Velindre Cancer Centre, Cardiff, United Kingdom.

## Contents

|          |                                                                |            |
|----------|----------------------------------------------------------------|------------|
| <b>1</b> | <b>Reporting Feature Extraction Settings</b>                   | <b>6</b>   |
| 1.1      | Imaging . . . . .                                              | 6          |
| 1.2      | Acquisition / Reconstruction . . . . .                         | 6          |
| 1.3      | Software . . . . .                                             | 6          |
| 1.4      | Data availability . . . . .                                    | 6          |
| 1.5      | Data conversion . . . . .                                      | 6          |
| 1.6      | Segmentation . . . . .                                         | 6          |
| 1.7      | Interpolation . . . . .                                        | 6          |
| 1.8      | Discretisation . . . . .                                       | 7          |
| 1.9      | Feature calculation . . . . .                                  | 7          |
| 1.10     | Feature list . . . . .                                         | 8          |
| <b>2</b> | <b>Robustness analysis with Linear interpolation</b>           | <b>11</b>  |
| 2.1      | Morphological & first order (Linear) . . . . .                 | 11         |
| 2.2      | Texture results (Linear) . . . . .                             | 12         |
| <b>3</b> | <b>Repeating Robustness analysis with Spline interpolation</b> | <b>13</b>  |
| 3.1      | Morphological & first order (Spline) . . . . .                 | 13         |
| 3.2      | Texture results (Spline) . . . . .                             | 14         |
| <b>4</b> | <b>Visualising Feature Response to Interpolation</b>           | <b>15</b>  |
| 4.1      | Plot explanation . . . . .                                     | 15         |
| 4.2      | Feature by feature plots . . . . .                             | 15         |
| <b>5</b> | <b>Modelling Interpolation response</b>                        | <b>88</b>  |
| 5.1      | Plot explanation . . . . .                                     | 88         |
| 5.2      | Surface fit corrections . . . . .                              | 89         |
|          | <b>Bibliography</b>                                            | <b>105</b> |

## List of Figures

|    |                                                            |    |
|----|------------------------------------------------------------|----|
| 1  | Group-1 robustness results (linear interpolation). . . . . | 11 |
| 2  | Group-2 robustness results (linear interpolation). . . . . | 12 |
| 3  | Group-1 robustness results (Spline interpolation). . . . . | 13 |
| 4  | Group-2 robustness results (Spline interpolation). . . . . | 14 |
| 5  | glcm3d-angularSecondMoment . . . . .                       | 16 |
| 6  | glcm3d-autoCorrelation . . . . .                           | 17 |
| 7  | glcm3d-clusterProminence . . . . .                         | 17 |
| 8  | glcm3d-clusterShade . . . . .                              | 18 |
| 9  | glcm3d-clusterTendency . . . . .                           | 18 |
| 10 | glcm3d-contrast . . . . .                                  | 19 |
| 11 | glcm3d-correlation . . . . .                               | 19 |
| 12 | glcm3d-differenceAverage . . . . .                         | 20 |
| 13 | glcm3d-differenceEntropy . . . . .                         | 20 |
| 14 | glcm3d-differenceVariance . . . . .                        | 21 |

|    |                                                  |    |
|----|--------------------------------------------------|----|
| 15 | glcm3d-dissimilarity . . . . .                   | 21 |
| 16 | glcm3d-infoCorrelation1 . . . . .                | 22 |
| 17 | glcm3d-infoCorrelation2 . . . . .                | 22 |
| 18 | glcm3d-inverseDifference . . . . .               | 23 |
| 19 | glcm3d-inverseDifferenceNorm . . . . .           | 23 |
| 20 | glcm3d-inverseDiffMoment . . . . .               | 24 |
| 21 | glcm3d-inverseDiffMomentNorm . . . . .           | 24 |
| 22 | glcm3d-inverseVariance . . . . .                 | 25 |
| 23 | glcm3d-jointAverage . . . . .                    | 25 |
| 24 | glcm3d-jointEntropy . . . . .                    | 26 |
| 25 | glcm3d-jointMaximum . . . . .                    | 26 |
| 26 | glcm3d-jointVariance . . . . .                   | 27 |
| 27 | glcm3d-sumAverage . . . . .                      | 27 |
| 28 | glcm3d-sumEntropy . . . . .                      | 28 |
| 29 | glcm3d-sumVariance . . . . .                     | 28 |
| 30 | gldzm3d-greyLevelNonUniformity . . . . .         | 29 |
| 31 | gldzm3d-greyLevelNonUniformityNorm . . . . .     | 29 |
| 32 | gldzm3d-greyLevelVariance . . . . .              | 30 |
| 33 | gldzm3d-highGreyLevelZoneEmphasis . . . . .      | 30 |
| 34 | gldzm3d-largeDistanceEmphasis . . . . .          | 31 |
| 35 | gldzm3d-largeDistancehighGreyLEmphasis . . . . . | 31 |
| 36 | gldzm3d-largeDistancelowGreyLEmphasis . . . . .  | 32 |
| 37 | gldzm3d-lowGreyLevelZoneEmphasis . . . . .       | 32 |
| 38 | gldzm3d-smallDistanceEmphasis . . . . .          | 33 |
| 39 | gldzm3d-smallDistanceHighGreyLEmphasis . . . . . | 33 |
| 40 | gldzm3d-smallDistanceLowGreyLEmphasis . . . . .  | 34 |
| 41 | gldzm3d-zoneDistanceEntropy . . . . .            | 34 |
| 42 | gldzm3d-zoneDistanceNonUniformity . . . . .      | 35 |
| 43 | gldzm3d-zoneDistanceNonUniformityNorm . . . . .  | 35 |
| 44 | gldzm3d-zoneDistanceVariance . . . . .           | 36 |
| 45 | gldzm3d-zonePercentage . . . . .                 | 36 |
| 46 | grrl3d-gl-NonUniformity . . . . .                | 37 |
| 47 | grrl3d-gl-NonUniformityNorm . . . . .            | 37 |
| 48 | grrl3d-gl-Variance . . . . .                     | 38 |
| 49 | grrl3d-highGLRunEmp . . . . .                    | 38 |
| 50 | grrl3d-longRunEmp . . . . .                      | 39 |
| 51 | grrl3d-longRunHighGLEmp . . . . .                | 39 |
| 52 | grrl3d-longRunLowGLEmp . . . . .                 | 40 |
| 53 | grrl3d-lowGLRunEmp . . . . .                     | 40 |
| 54 | grrl3d-rl-NonUniformity . . . . .                | 41 |
| 55 | grrl3d-rl-NonUniformityNorm . . . . .            | 41 |
| 56 | grrl3d-rl-Variance . . . . .                     | 42 |
| 57 | grrl3d-runEntropy . . . . .                      | 42 |
| 58 | grrl3d-runPercentage . . . . .                   | 43 |
| 59 | grrl3d-shortRunEmp . . . . .                     | 43 |
| 60 | grrl3d-shortRunHighGLEmp . . . . .               | 44 |
| 61 | grrl3d-shortRunLowGLEmp . . . . .                | 44 |

|     |                                               |    |
|-----|-----------------------------------------------|----|
| 62  | glszm3d-gl-NonUniformity . . . . .            | 45 |
| 63  | glszm3d-gl-NonUniformityNorm . . . . .        | 45 |
| 64  | glszm3d-gl-Variance . . . . .                 | 46 |
| 65  | glszm3d-highGLZoneEmphasis . . . . .          | 46 |
| 66  | glszm3d-largeZoneEmphasis . . . . .           | 47 |
| 67  | glszm3d-largeZoneHighGLEmphasis . . . . .     | 47 |
| 68  | glszm3d-largeZoneLowGLEmphasis . . . . .      | 48 |
| 69  | glszm3d-lowGLZoneEmphasis . . . . .           | 48 |
| 70  | glszm3d-smallZoneEmphasis . . . . .           | 49 |
| 71  | glszm3d-smallZoneHighGLEmphasis . . . . .     | 49 |
| 72  | glszm3d-smallZoneLowGLEmphasis . . . . .      | 50 |
| 73  | glszm3d-zonePercentage . . . . .              | 50 |
| 74  | glszm3d-zoneSizeEntropy . . . . .             | 51 |
| 75  | glszm3d-zoneSizeNonUniformity . . . . .       | 51 |
| 76  | glszm3d-zoneSizeNonUniformityNorm . . . . .   | 52 |
| 77  | glszm3d-zoneSizeVariance . . . . .            | 52 |
| 78  | ngtdm3d-busyness . . . . .                    | 53 |
| 79  | ngtdm3d-coarseness . . . . .                  | 53 |
| 80  | ngtdm3d-complexity . . . . .                  | 54 |
| 81  | ngtdm3d-contrast . . . . .                    | 54 |
| 82  | ngtdm3d-strength . . . . .                    | 55 |
| 83  | intHist-coefficientofVariation . . . . .      | 56 |
| 84  | intHist-entropy . . . . .                     | 57 |
| 85  | intHist-IQR . . . . .                         | 57 |
| 86  | intHist-kurtosis . . . . .                    | 58 |
| 87  | intHist-maxGradient . . . . .                 | 58 |
| 88  | intHist-maxGradientGreyLevel . . . . .        | 59 |
| 89  | intHist-maxGreyLevel . . . . .                | 59 |
| 90  | intHist-mean . . . . .                        | 60 |
| 91  | intHist-meanAbsoluteDeviation . . . . .       | 60 |
| 92  | intHist-median . . . . .                      | 61 |
| 93  | intHist-medianAbsoluteDeviation . . . . .     | 61 |
| 94  | intHist-minGradient . . . . .                 | 62 |
| 95  | intHist-minGradientGreyLevel . . . . .        | 62 |
| 96  | intHist-minGreyLevel . . . . .                | 63 |
| 97  | intHist-mode . . . . .                        | 63 |
| 98  | intHist-percentile10 . . . . .                | 64 |
| 99  | intHist-percentile90 . . . . .                | 64 |
| 100 | intHist-quartileCoefDispersion . . . . .      | 65 |
| 101 | intHist-range . . . . .                       | 65 |
| 102 | intHist-robustMeanAbsoluteDeviation . . . . . | 66 |
| 103 | intHist-skewness . . . . .                    | 66 |
| 104 | intHist-uniformity . . . . .                  | 67 |
| 105 | intHist-variance . . . . .                    | 67 |
| 106 | morph-areaDensity-aabb . . . . .              | 68 |
| 107 | morph-areaDensity-ae . . . . .                | 68 |
| 108 | morph-areaDensity-convexHull . . . . .        | 69 |

|     |                                                  |    |
|-----|--------------------------------------------------|----|
| 109 | morph-asphericity                                | 69 |
| 110 | morph-compactness1                               | 70 |
| 111 | morph-compactness2                               | 70 |
| 112 | morph-COMshift                                   | 71 |
| 113 | morph-elongation                                 | 71 |
| 114 | morph-flatness                                   | 72 |
| 115 | morph-integratedIntensity                        | 72 |
| 116 | morph-leastAxisLength                            | 73 |
| 117 | morph-majorAxisLength                            | 73 |
| 118 | morph-max3Ddiameter                              | 74 |
| 119 | morph-minorAxisLength                            | 74 |
| 120 | morph-sphericalDisproportion                     | 75 |
| 121 | morph-sphericity                                 | 75 |
| 122 | morph-surfaceArea                                | 76 |
| 123 | morph-surfAreaToVolumeRatio                      | 76 |
| 124 | morph-volDensity-aabb                            | 77 |
| 125 | morph-volDensity-ae                              | 77 |
| 126 | morph-volDensity-convexHull                      | 78 |
| 127 | morph-volume                                     | 78 |
| 128 | stat-coefficientofVariation                      | 79 |
| 129 | stat-Energy                                      | 79 |
| 130 | stat-IQR                                         | 80 |
| 131 | stat-kurtosis                                    | 80 |
| 132 | stat-maxGreyLevel                                | 81 |
| 133 | stat-mean                                        | 81 |
| 134 | stat-meanAbsoluteDeviation                       | 82 |
| 135 | stat-median                                      | 82 |
| 136 | stat-medianAbsoluteDeviation                     | 83 |
| 137 | stat-minGreyLevel                                | 83 |
| 138 | stat-percentile10                                | 84 |
| 139 | stat-percentile90                                | 84 |
| 140 | stat-quartileCoefDispersion                      | 85 |
| 141 | stat-range                                       | 85 |
| 142 | stat-robustMeanAbsoluteDeviation                 | 86 |
| 143 | stat-rootMeanSquare                              | 86 |
| 144 | stat-skewness                                    | 87 |
| 145 | stat-variance                                    | 87 |
| 146 | Modelling response: glcm3d-contrast              | 89 |
| 147 | Modelling response: glcm3d-correlation           | 89 |
| 148 | Modelling response: glcm3d-differenceAverage     | 89 |
| 149 | Modelling response: glcm3d-differenceEntropy     | 90 |
| 150 | Modelling response: glcm3d-differenceVariance    | 90 |
| 151 | Modelling response: glcm3d-dissimilarity         | 90 |
| 152 | Modelling response: glcm3d-inverseDifference     | 91 |
| 153 | Modelling response: glcm3d-inverseDifferenceNorm | 91 |
| 154 | Modelling response: glcm3d-inverseDiffMoment     | 92 |
| 155 | Modelling response: glcm3d-inverseDiffMomentNorm | 92 |

---

|     |                                                                  |     |
|-----|------------------------------------------------------------------|-----|
| 156 | Modelling response: glcm3d-inverseVariance . . . . .             | 93  |
| 157 | Modelling response: gldzm3d-greyLevelNonUniformityNorm . . . . . | 93  |
| 158 | Modelling response: gldzm3d-zoneDistanceNonUniformity . . . . .  | 94  |
| 159 | Modelling response: gldzm3d-zonePercentage . . . . .             | 94  |
| 160 | Modelling response: glrl3d-gl-NonUniformity . . . . .            | 95  |
| 161 | Modelling response: glrl3d-longRunEmp . . . . .                  | 95  |
| 162 | Modelling response: glrl3d-rl-NonUniformity . . . . .            | 96  |
| 163 | Modelling response: glrl3d-rl-NonUniformityNorm . . . . .        | 96  |
| 164 | Modelling response: glrl3d-rl-Variance . . . . .                 | 97  |
| 165 | Modelling response: glrl3d-runPercentage . . . . .               | 97  |
| 166 | Modelling response: glrl3d-shortRunEmp . . . . .                 | 98  |
| 167 | Modelling response: glszm3d-gl-NonUniformityNorm . . . . .       | 98  |
| 168 | Modelling response: glszm3d-largeZoneEmphasis . . . . .          | 99  |
| 169 | Modelling response: glszm3d-largeZoneHighGLEmphasis . . . . .    | 99  |
| 170 | Modelling response: glszm3d-largeZoneLowGLEmphasis . . . . .     | 100 |
| 171 | Modelling response: glszm3d-zonePercentage . . . . .             | 100 |
| 172 | Modelling response: glszm3d-zoneSizeNonUniformity . . . . .      | 101 |
| 173 | Modelling response: glszm3d-zoneSizeVariance . . . . .           | 101 |
| 174 | Modelling response: intHist-maxGradient . . . . .                | 102 |
| 175 | Modelling response: intHist-minGradient . . . . .                | 102 |
| 176 | Modelling response: ngtdm3d-busyness . . . . .                   | 103 |
| 177 | Modelling response: ngtdm3d-coarseness . . . . .                 | 103 |
| 178 | Modelling response: ngtdm3d-contrast . . . . .                   | 104 |
| 179 | Modelling response: stat-Energy . . . . .                        | 104 |

---

# 1 Reporting Feature Extraction Settings

## 1.1 Imaging

$^{18}\text{F}$ -FDG PET / CT imaging. This work utilises the PET component.

## 1.2 Acquisition / Reconstruction

A GE 690 PET/CT scanner (GE Healthcare, Buckinghamshire, UK) was used for all patients. Patients were fasted for at least 6 hours prior to tracer administration. Serum glucose levels were routinely checked and confirmed as less than 7.0 mmol/L prior to imaging. Patients received a dose of 4 MBq of  $^{18}\text{F}$ -FDG/kg. Uptake time was 90 minutes, which is standard practice at our institution. PET images were acquired at 3 minutes per field of view. The length of the axial field of view was 15.7 cm (skull base to mid-thigh). Images were reconstructed with the ordered subset expectation maximisation algorithm, with 24 subsets and 2 iterations. Matrix size was 256 x 256 pixels, using the VUE Point™ time of flight algorithm. CT images were acquired in a helical acquisition with a pitch of 0.98 and tube rotation speed of 0.5 seconds. Tube output was 120 kVp with output modulation between 20 and 200 mA. Matrix size for the CT acquisition was 512 x 512 pixels with a 50 cm field of view. No oral or intravenous contrast was administered. Further details can be found in Foley *et al.* [1].

## 1.3 Software

CERR (Computational Environment for Radiological Research)[2] was used to import DICOM files into Matlab. Feature extraction was done with SPAARC (Spaarc Pipeline for Automated Analysis and Radiomics Computing), an in-house software built on the MATLAB platform (MathWorks, Natick, MA, USA).

## 1.4 Data availability

Original DICOM data cannot be made publically available at this time. However, visualisations of Scan VOIs are available on request.

## 1.5 Data conversion

PET imaging was converted from Becquerel/ml (Bq/ml) to Standardised Uptake Value (SUV) using CERR functionality that pulls the necessary information for conversion from the DICOM image tags.

## 1.6 Segmentation

The PET VOIs were segmented using ATLAAS [3]. Contours were rated by an expert radiologist (author KF) using a binary score (acceptable=1, unacceptable=0). Segmentations were performed on the original scan dimension 2.73 x 2.73 x 3.27 mm.

## 1.7 Interpolation

This study assessed isotropic interpolation to voxel dimensions of 2.7mm, 2.5mm, 2.2mm, 2.0mm, 1.8mm, and 1.5mm. Both tri-linear and spline interpolation methods were explored. The mask defining the VOI was always interpolated linearly, following IBSI guidelines [4].

## 1.8 Discretisation

We used a *fixed bin width* method to discretise the scan values [4]. The bin width was set to 0.5 SUV.

## 1.9 Feature calculation

Feature extraction parameters are detailed in Table 1. All Algorithm definitions can be found in IBSI documentation [4]. A list of the full feature names can be see in Table 2. SPAARC feature algorithms have been validated on a digital phantom and patient test data as part of the IBSI [4].

Table 1: Feature extraction parameters.

| Texture Matrix                                    | Parameters                                                                                                                                                                                    |
|---------------------------------------------------|-----------------------------------------------------------------------------------------------------------------------------------------------------------------------------------------------|
| grey level cooccurrence matrix (GLCM)             | Distance = 1 voxel.<br>Directions = 13 unique directions of the 26-connected neighbours.<br>Matrix merging method = Merged GLCMs for each direction and calculated features on single matrix. |
| grey level run length matrix (GLRL)               | Distance = 1 voxel.<br>Directions = 13 unique direction vectors.<br>Matrix merging method = Merged GLRLs for each direction and calculated features on single matrix.                         |
| grey level size zone matrix (GLSZM)               | Connectivity for all 26 neighbours in 3D.                                                                                                                                                     |
| grey level distance zone matrix (GLDZM)           | Connectivity for all 26 neighbours in 3D.<br>Distance map generated with 6-connectivity.                                                                                                      |
| neighbourhood grey tone difference matrix (NGTDM) | Distance = 1 voxel.                                                                                                                                                                           |



## 1.10 Feature list

Table 2: Feature names and corresponding code

| Type                               | Feature Name                              | Code                                   |
|------------------------------------|-------------------------------------------|----------------------------------------|
| GLCM                               | Angular Second Moment                     | glcm3d-angularSecondMoment             |
|                                    | Auto Correlation                          | glcm3d-autoCorrelation                 |
|                                    | Cluster Prominence                        | glcm3d-clusterProminence               |
|                                    | Cluster Shade                             | glcm3d-clusterShade                    |
|                                    | Cluster Tendency                          | glcm3d-clusterTendency                 |
|                                    | Contrast                                  | glcm3d-contrast                        |
|                                    | Correlation                               | glcm3d-correlation                     |
|                                    | Difference Average                        | glcm3d-differenceAverage               |
|                                    | Difference Entropy                        | glcm3d-differenceEntropy               |
|                                    | Difference Variance                       | glcm3d-differenceVariance              |
|                                    | Dissimilarity                             | glcm3d-dissimilarity                   |
|                                    | First measure of information correlation  | glcm3d-infoCorrelation1                |
|                                    | Second measure of information correlation | glcm3d-infoCorrelation2                |
|                                    | Inverse difference                        | glcm3d-inverseDifference               |
|                                    | Inverse difference normalised             | glcm3d-inverseDifferenceNorm           |
|                                    | Inverse difference moment                 | glcm3d-inverseDiffMoment               |
|                                    | Inverse difference moment normalised      | glcm3d-inverseDiffMomentNorm           |
|                                    | Inverse Variance                          | glcm3d-inverseVariance                 |
|                                    | Joint Average                             | glcm3d-jointAverage                    |
|                                    | Joint Entropy                             | glcm3d-jointEntropy                    |
|                                    | Joint Maximum                             | glcm3d-jointMaximum                    |
|                                    | Joint Variance                            | glcm3d-jointVariance                   |
|                                    | Sum Average                               | glcm3d-sumAverage                      |
|                                    | Sum Entropy                               | glcm3d-sumEntropy                      |
|                                    | Sum Variance                              | glcm3d-sumVariance                     |
| GLDZM                              | Grey Level Non-uniformity                 | gldzm3d-greyLevelNonUniformity         |
|                                    | Grey Level Non-uniformity Normalised      | gldzm3d-greyLevelNonUniformityNorm     |
|                                    | Grey Level Variance                       | gldzm3d-greyLevelVariance              |
|                                    | High Grey Level Zone Emphasis             | gldzm3d-highGreyLevelZoneEmphasis      |
|                                    | Large Distance Emphasis                   | gldzm3d-largeDistanceEmphasis          |
|                                    | Large Distance High Grey Level Emphasis   | gldzm3d-largeDistanceHighGreyLEmphasis |
|                                    | Large Distance Low Grey Level Emphasis    | gldzm3d-largeDistanceLowGreyLEmphasis  |
|                                    | Low Grey Level Zone Emphasis              | gldzm3d-lowGreyLevelZoneEmphasis       |
|                                    | Small Distance Emphasis                   | gldzm3d-smallDistanceEmphasis          |
|                                    | Small Distance High Grey Level Emphasis   | gldzm3d-smallDistanceHighGreyLEmphasis |
|                                    | Small Distance Low Grey Level Emphasis    | gldzm3d-smallDistanceLowGreyLEmphasis  |
|                                    | Zone Distance Entropy                     | gldzm3d-zoneDistanceEntropy            |
|                                    | Zone Distance Non-Uniformity              | gldzm3d-zoneDistanceNonUniformity      |
|                                    | Zone Distance Non-Uniformity Normalised   | gldzm3d-zoneDistanceNonUniformityNorm  |
|                                    | Zone Distance Variance                    | gldzm3d-zoneDistanceVariance           |
| Zone Percentage                    | gldzm3d-zonePercentage                    |                                        |
| GLRL                               | Grey Level Non-uniformity                 | glrl3d-gl_NonUniformity                |
|                                    | Grey Level Non-uniformity Normalised      | glrl3d-gl_NonUniformityNorm            |
|                                    | Grey Level Variance                       | glrl3d-gl_Variance                     |
|                                    | High Grey Level Run Emphasis              | glrl3d-highGLRunEmp                    |
|                                    | Long Runs Emphasis                        | glrl3d-longRunEmp                      |
|                                    | Long Run High Grey Level Emphasis         | glrl3d-longRunHighGLEmp                |
|                                    | Long Run Low Grey Level Emphasis          | glrl3d-longRunLowGLEmp                 |
|                                    | Low Grey Level Run Emphasis               | glrl3d-lowGLRunEmp                     |
|                                    | Run Length Non-uniformity                 | glrl3d-rl_NonUniformity                |
|                                    | Run Length Non-uniformity Normalised      | glrl3d-rl_NonUniformityNorm            |
|                                    | Run Length Variance                       | glrl3d-rl_Variance                     |
|                                    | Run Entropy                               | glrl3d-runEntropy                      |
|                                    | Run Percentage                            | glrl3d-runPercentage                   |
|                                    | Short Run Emphasis                        | glrl3d-shortRunEmp                     |
|                                    | Short Run High Grey Level Emphasis        | glrl3d-shortRunHighGLEmp               |
| Short Run Low Grey Level Emphasis  | glrl3d-shortRunLowGLEmp                   |                                        |
| GLSZM                              | Grey Level Non-uniformity                 | glszm3d-gl_NonUniformity               |
|                                    | Grey Level Non-uniformity Normalised      | glszm3d-gl_NonUniformityNorm           |
|                                    | Grey Level Variance                       | glszm3d-gl_Variance                    |
|                                    | High Grey Level Zone Emphasis             | glszm3d-highGLZoneEmphasis             |
|                                    | Large Zone Emphasis                       | glszm3d-largeZoneEmphasis              |
|                                    | Large Zone High Grey Level Emphasis       | glszm3d-largeZoneHighGLEmphasis        |
| Large Zone Low Grey Level Emphasis | glszm3d-largeZoneLowGLEmphasis            |                                        |

|                     |                                     |                                     |
|---------------------|-------------------------------------|-------------------------------------|
|                     | Low Grey Level Zone Emphasis        | glszm3d-lowGLZoneEmphasis           |
|                     | Small Zone Emphasis                 | glszm3d-smallZoneEmphasis           |
|                     | Small Zone High Grey Level Emphasis | glszm3d-smallZoneHighGLEmphasis     |
|                     | Small Zone Low Grey Level Emphasis  | glszm3d-smallZoneLowGLEmphasis      |
|                     | Zone Percentage                     | glszm3d-zonePercentage              |
|                     | Zone Size Entropy                   | glszm3d-zoneSizeEntropy             |
|                     | Zone Size Non-uniformity            | glszm3d-zoneSizeNonUniformity       |
|                     | Zone Size Non-uniformity Normalised | glszm3d-zoneSizeNonUniformityNorm   |
|                     | Zone Size Variance                  | glszm3d-zoneSizeVariance            |
| NGTDM               | Busyness                            | ngtdm3d_busyness                    |
|                     | Coarseness                          | ngtdm3d_coarseness                  |
|                     | Complexity                          | ngtdm3d_complexity                  |
|                     | Contrast                            | ngtdm3d_contrast                    |
|                     | Strength                            | ngtdm3d_strength                    |
| Intensity Histogram | Coefficient of Variation            | intHist_coefficientofVariation      |
|                     | Entropy                             | intHist_entropy                     |
|                     | Interquartile range                 | intHist_IQR                         |
|                     | Kurtosis                            | intHist_kurtosis                    |
|                     | Maximum histogram gradient          | intHist_maxGradient                 |
|                     | Maximum gradient grey level         | intHist_maxGradientGreyLevel        |
|                     | Maximum                             | intHist_maxGreyLevel                |
|                     | Mean                                | intHist_mean                        |
|                     | Mean absolute deviation             | intHist_meanAbsoluteDeviation       |
|                     | Median                              | intHist_median                      |
|                     | Median absolute deviation           | intHist_medianAbsoluteDeviation     |
|                     | Minimum histogram gradient          | intHist_minGradient                 |
|                     | Minimum gradient grey level         | intHist_minGradientGreyLevel        |
|                     | Minimum                             | intHist_minGreyLevel                |
|                     | Mode                                | intHist_mode                        |
|                     | 10th percentile                     | intHist_percentile10                |
|                     | 90th percentile                     | intHist_percentile90                |
|                     | Quartile coefficient of dispersion  | intHist_quartileCoefDispersion      |
|                     | Range                               | intHist_range                       |
|                     | Robust mean absolute deviation      | intHist_robustMeanAbsoluteDeviation |
|                     | Skewness                            | intHist_skewness                    |
|                     | Uniformity                          | intHist_uniformity                  |
|                     | Variance                            | intHist_variance                    |
| Morphology          | Area density (AABB)                 | morph_areaDensity_aabb              |
|                     | Area density (AEE)                  | morph_areaDensity_aee               |
|                     | Area density (convex hull)          | morph_areaDensity_convexHull        |
|                     | Asphericity                         | morph_asphericity                   |
|                     | Compactness 1                       | morph_compactness1                  |
|                     | Compactness 2                       | morph_compactness2                  |
|                     | Centre of mass shift                | morph_COMshift                      |
|                     | Elongation                          | morph_elongation                    |
|                     | Flatness                            | morph_flatness                      |
|                     | Integrated intensity                | morph_integratedIntensity           |
|                     | Least axis length                   | morph_leastAxisLength               |
|                     | Major axis length                   | morph_majorAxisLength               |
|                     | Maximum 3D diameter                 | morph_max3Ddiameter                 |
|                     | Minor axis length                   | morph_minorAxisLength               |
|                     | Spherical disproportion             | morph_sphericalDisproportion        |
|                     | Sphericity                          | morph_sphericity                    |
|                     | Surface area                        | morph_surfaceArea                   |
|                     | Surface to volume ratio             | morph_surfAreaToVolumeRatio         |
|                     | Volume density (AABB)               | morph_volDensity_aabb               |
|                     | Volume density (AEE)                | morph_volDensity_aee                |
|                     | Volume density (convex hull)        | morph_volDensity_convexHull         |
|                     | Volume (mesh-based)                 | morph_volume                        |
| Statistical         | Coefficient of Variation            | stat_coefficientofVariation         |
|                     | Entropy                             | stat_Energy                         |
|                     | Interquartile range                 | stat_IQR                            |
|                     | Kurtosis                            | stat_kurtosis                       |
|                     | Maximum                             | stat_maxGreyLevel                   |
|                     | Mean                                | stat_mean                           |
|                     | Mean absolute deviation             | stat_meanAbsoluteDeviation          |
|                     | Median                              | stat_median                         |
|                     | Median absolute deviation           | stat_medianAbsoluteDeviation        |
|                     | Minimum                             | stat_minGreyLevel                   |

|                                    |                                  |
|------------------------------------|----------------------------------|
| 10th percentile                    | stat_percentile10                |
| 90th percentile                    | stat_percentile90                |
| Quartile coefficient of dispersion | stat_quartileCoefDispersion      |
| Range                              | stat_range                       |
| Robust mean absolute deviation     | stat_robustMeanAbsoluteDeviation |
| Root mean square                   | stat_rootMeanSquare              |
| Skewness                           | stat_skewness                    |
| Variance                           | stat_variance                    |

## 2 Robustness analysis with Linear interpolation

### 2.1 Morphological & first order (Linear)

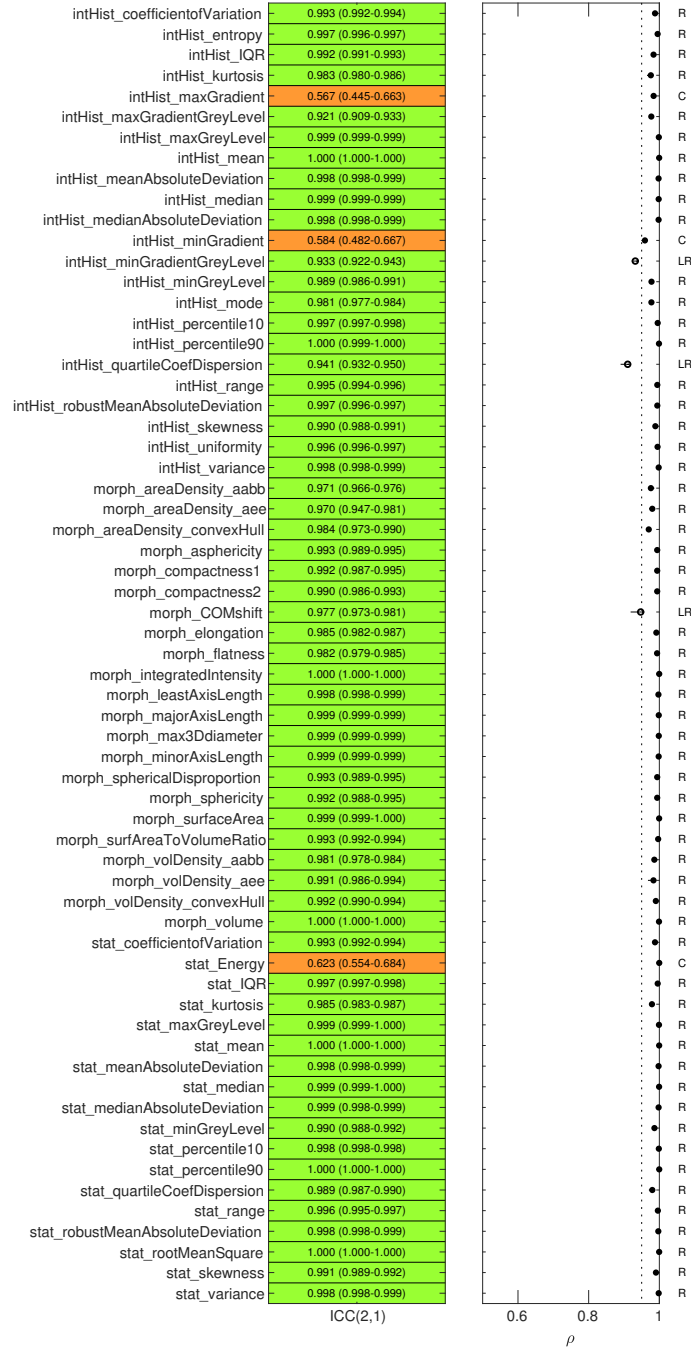

Figure 1: Group-1 robustness results (linear interpolation). Analysis of morphological and first order features. These results are in the same style as Fig.2 in the main manuscript.

2.2 Texture results (Linear)

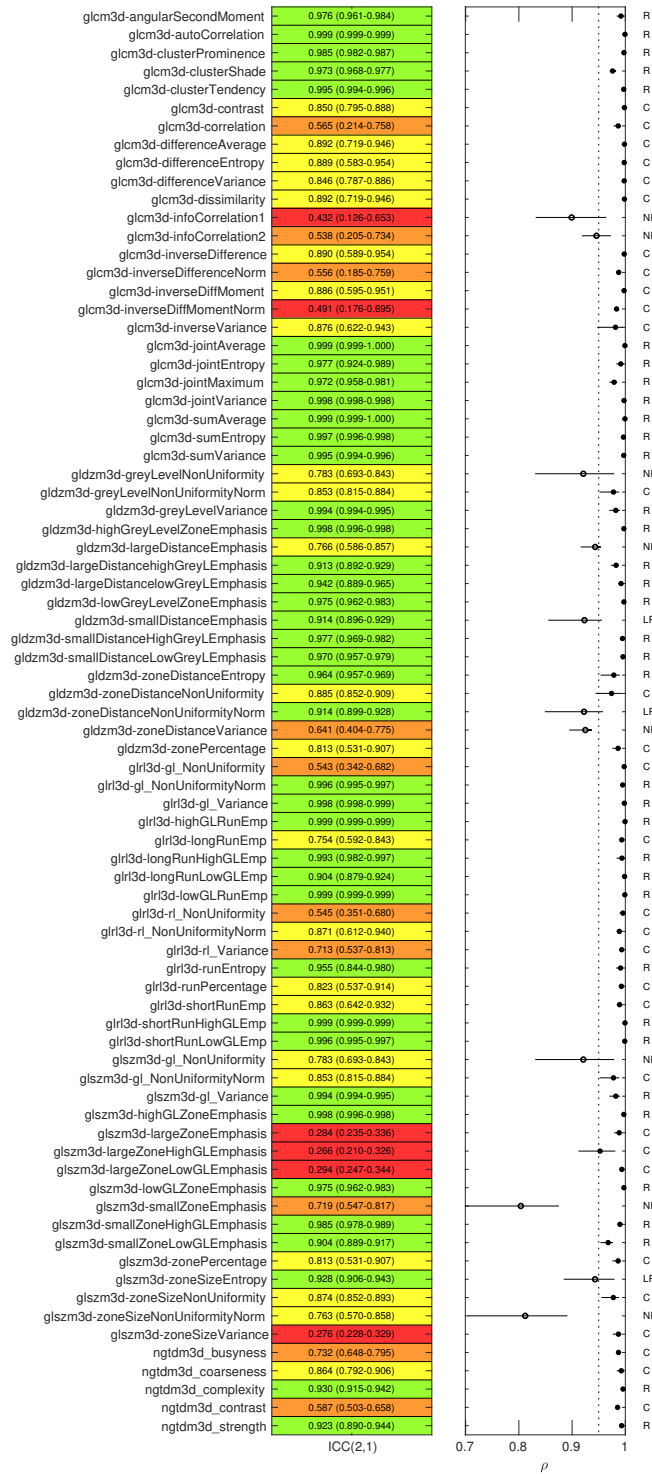

Figure 2: Group-2 robustness results (Linear interpolation). Same as Fig.2 in main manuscript, put here for completeness.

### 3 Repeating Robustness analysis with Spline interpolation

#### 3.1 Morphological & first order (Spline)

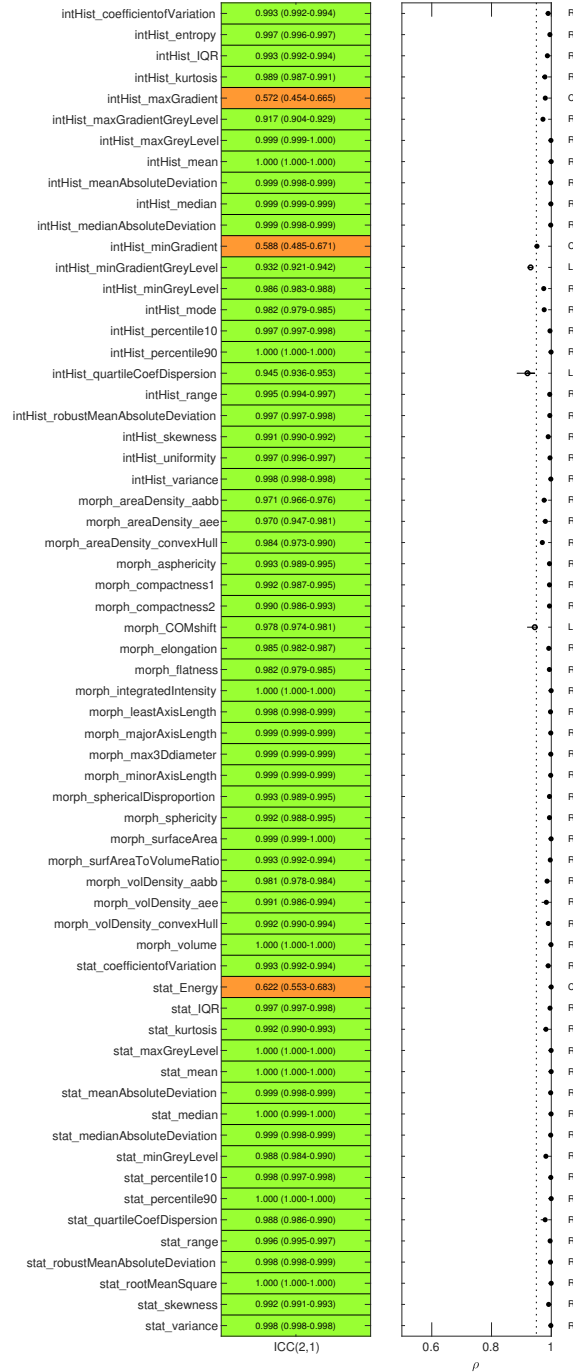

Figure 3: Group-1 robustness results (Spline interpolation). Morphological and first order features.

**NOTE:** Morphological features that depend only on the mask and not the scan values will always have exactly the same results between linear and spline because the binary mask defining the VOI is always interpolated linearly in our implementation (as per IBSI recommendations).

### 3.2 Texture results (Spline)

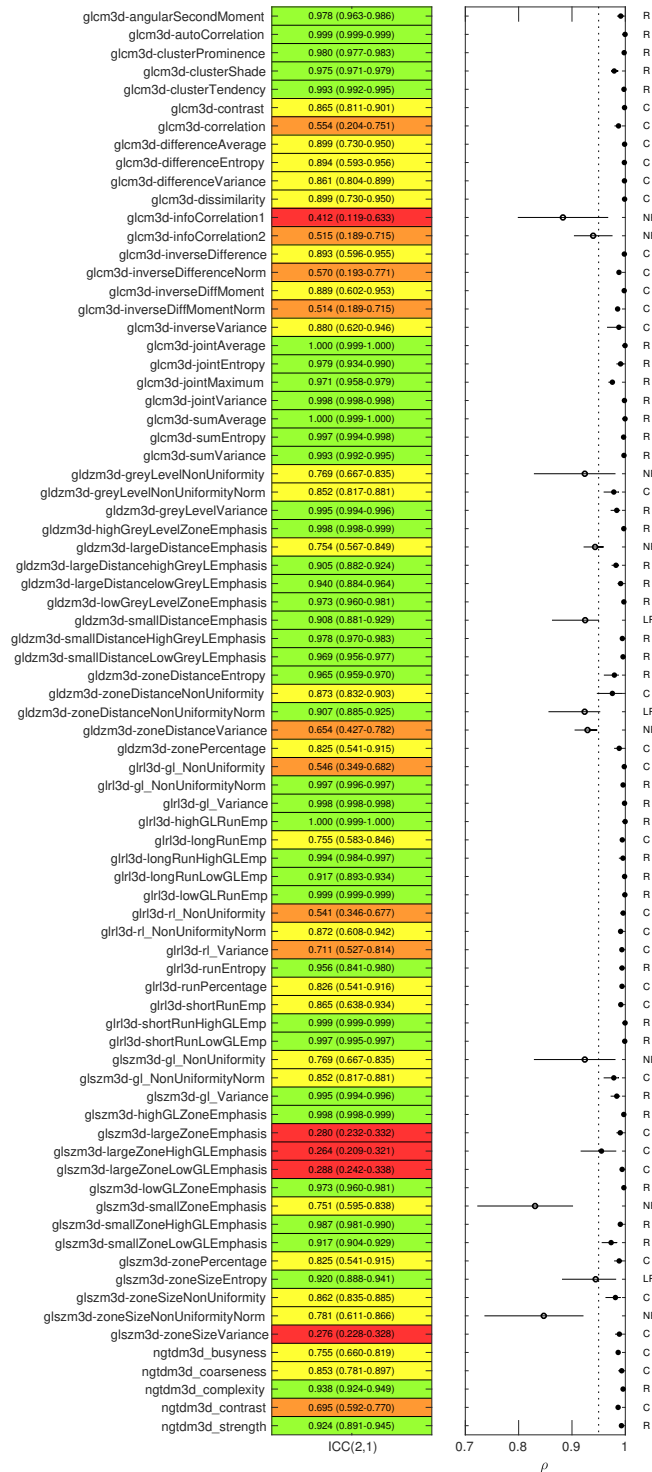

Figure 4: Group-2 robustness results (Spline interpolation). Texture features. These results are generated in the same way as Fig.2 in the main manuscript but with Spline interpolation used.

---

## 4 Visualising Feature Response to Interpolation

For all 141 features we visualised the change in feature values when resampling to different isotropic voxel sizes, using both linear and spline methods (examples of this are used in Figure 3 of main manuscript). These results were generated using the testing datasets. We also compared the difference in feature values between linear and spline methods for the 2.7mm voxel size results.

### 4.1 Plot explanation

Each of the 141 features has 6 plots, labelled a to f, that are summarised as follows:

- a) (Linear interpolation) – Visualisation of feature response to voxel-size resampling. Each patient was given a rank based on the results of 2.7mm dimension which was plotted against the extracted feature values for all voxel dimensions.
- b) (Spline interpolation) – Visualisation of feature response to voxel-size resampling. Patient ranking was kept from the linear results to enable a direct comparison between plots a) and b).
- c) Spline Vs Linear – For the 2.7mm voxel-size, the spline results were plotted against the linear results.
- d) Spline Vs Linear – Differences in feature values for 2.7mm voxel-size,  $[(\text{Spline} - \text{Linear}) / \text{Average } \%]$ , plotted as a histogram. An Anderson-Darling test was used to assess normality (Matlab function `adtest`). Null hypothesis is that sample is drawn from a normal distribution.
- e) Spline Vs Linear – Boxplot representation of the difference in feature values between linear and spline for 2.7mm voxel-size.
- f) Spline Vs Linear – Bland-Altman style analysis for 2.7mm voxel-size: The difference in feature value is plotted against the average value. Limits of agreement are set based on a normality test. If the distribution is normal, we used  $mean \pm 1.96 \times sd$ . If the distribution is not normal, we used 2.5 and 97.5 percentile limits.

### 4.2 Feature by feature plots



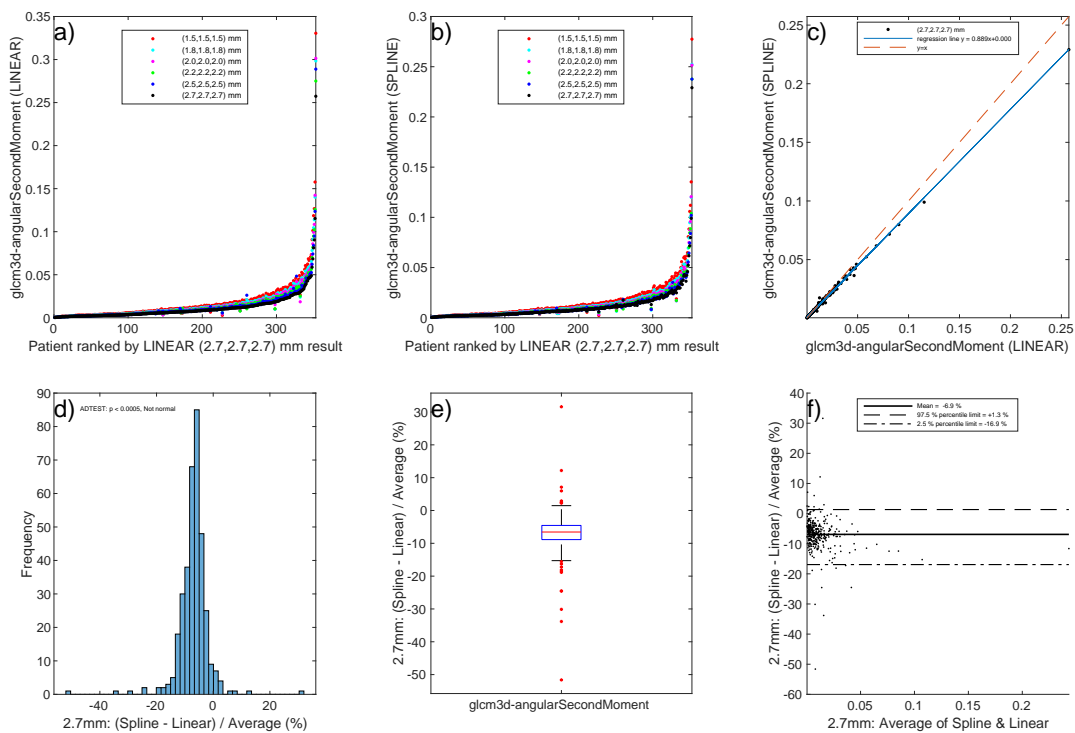

Figure 5:  $glcm3d-angularSecondMoment$

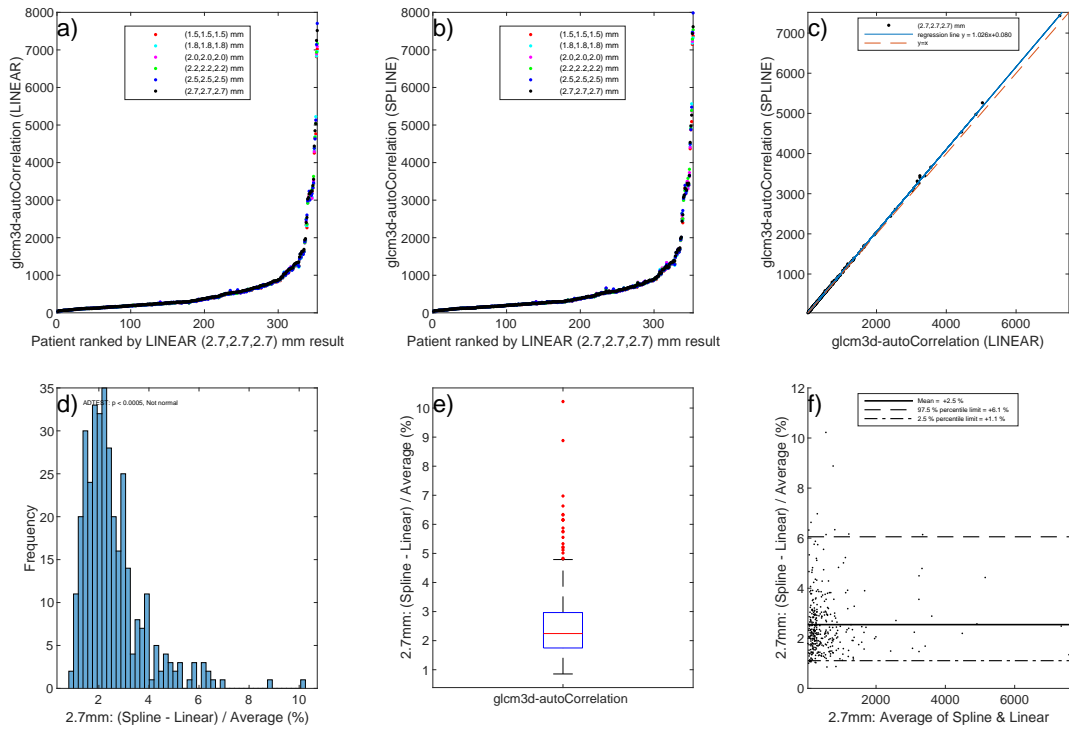

Figure 6: glm3d-autoCorrelation

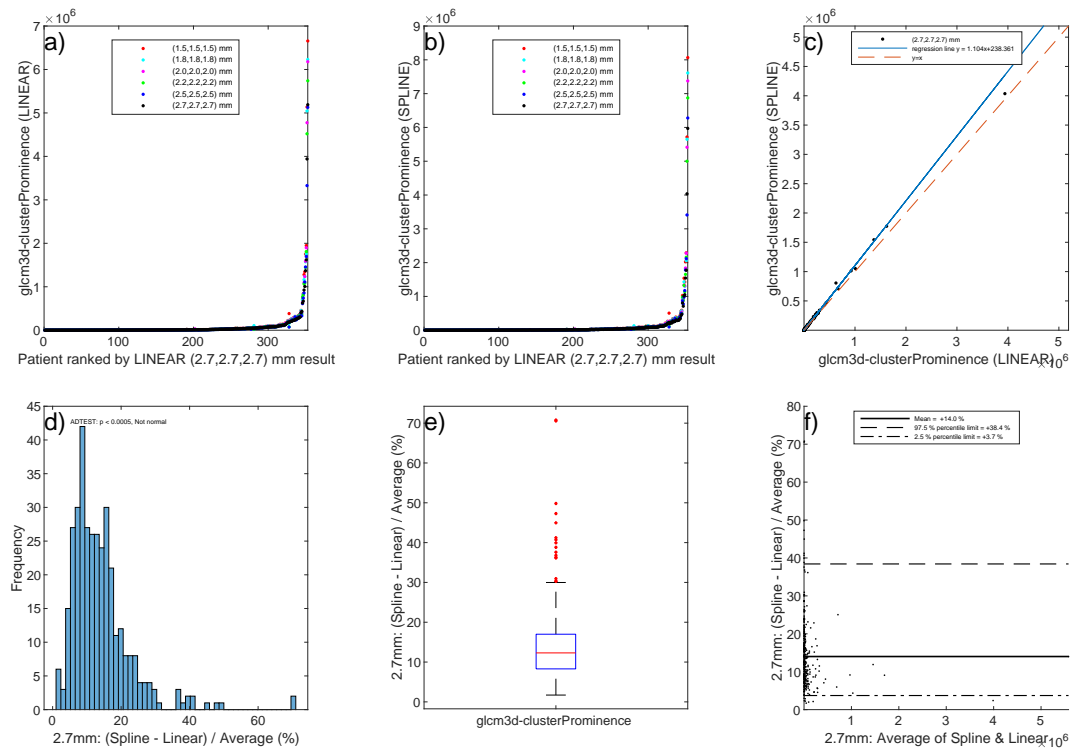

Figure 7: glm3d-clusterProminence

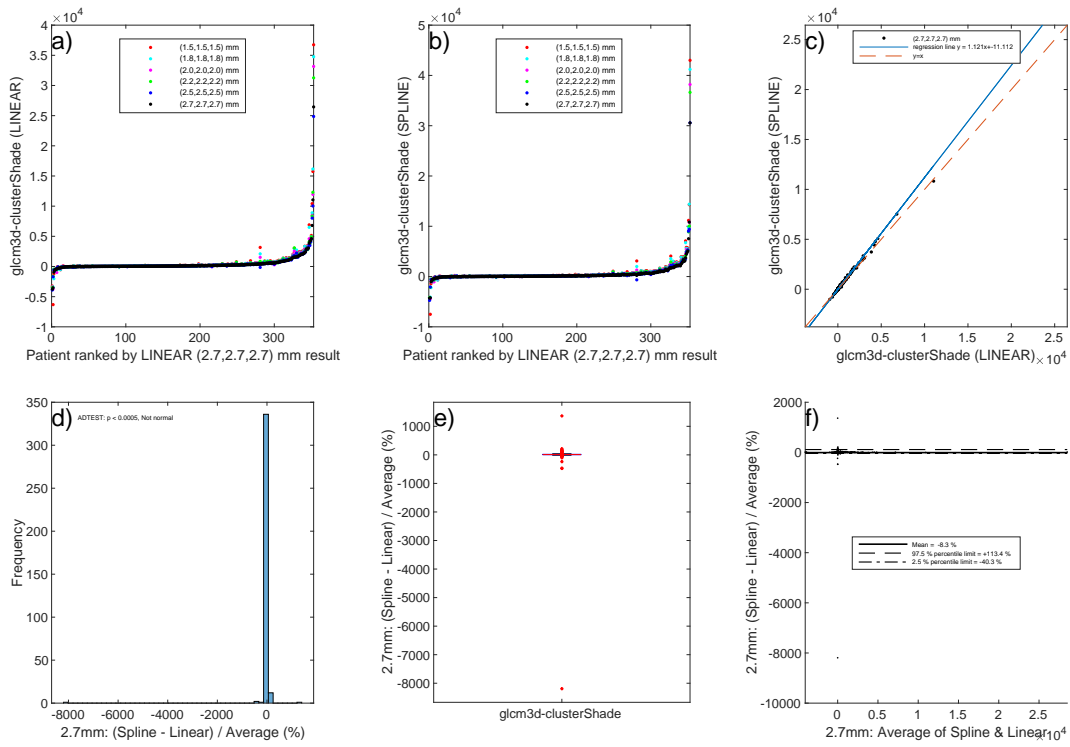

Figure 8: `glm3d-clusterShade`

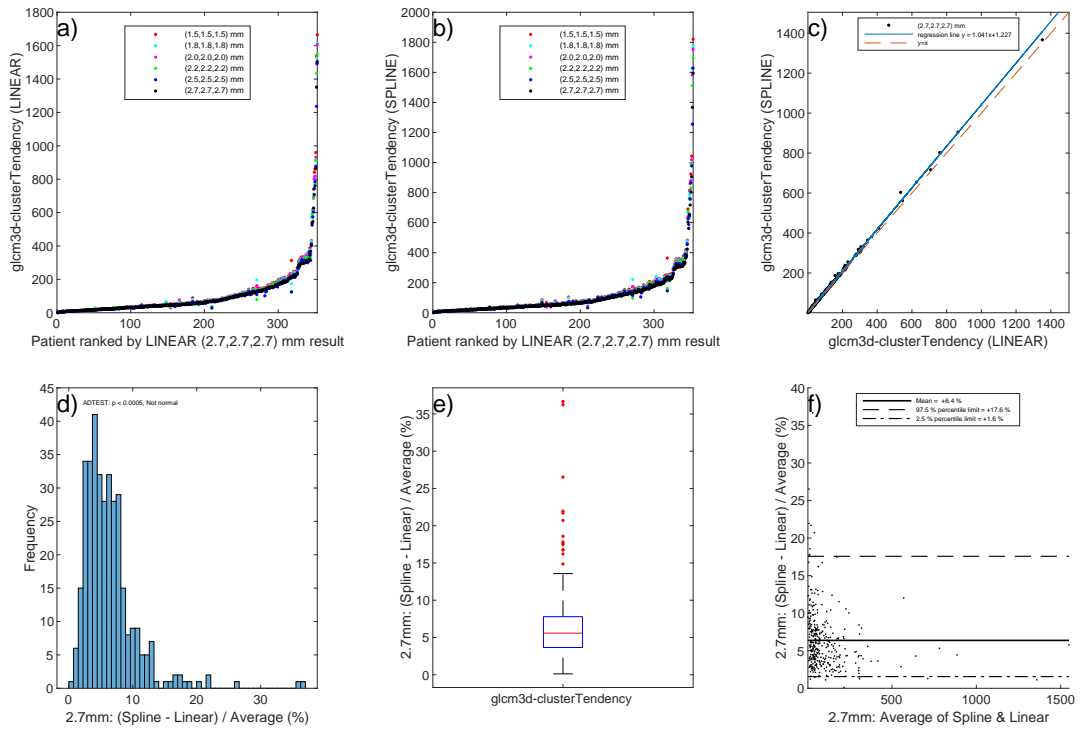

Figure 9: `glm3d-clusterTendency`

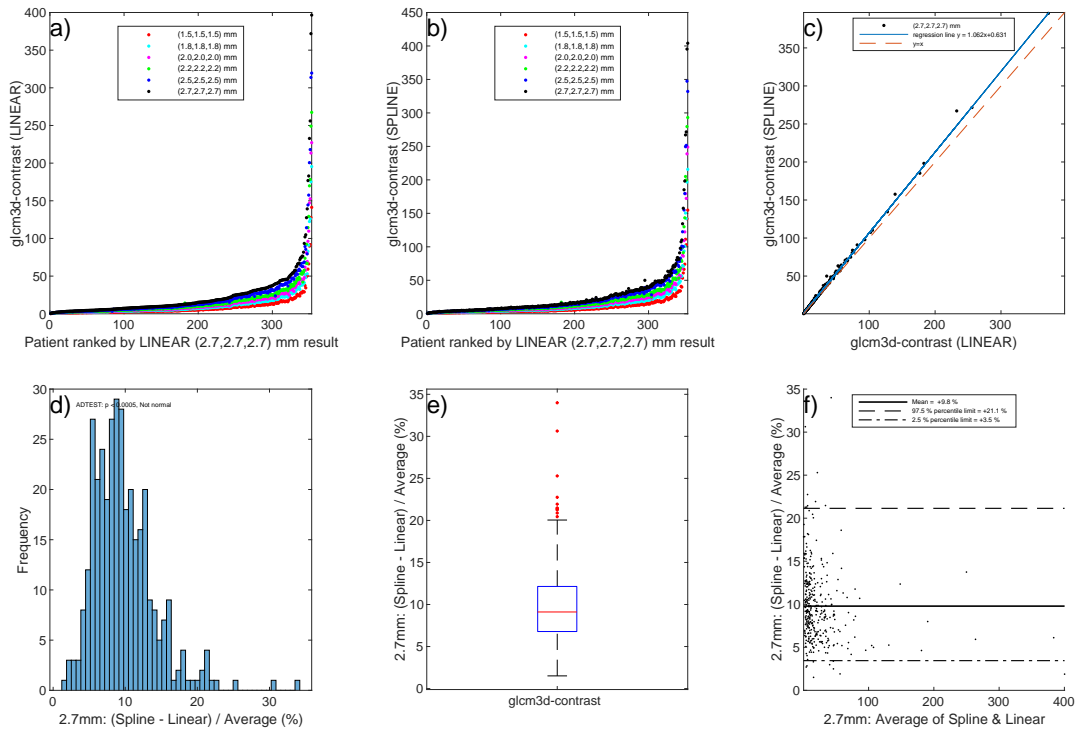

Figure 10: glcm3d-contrast

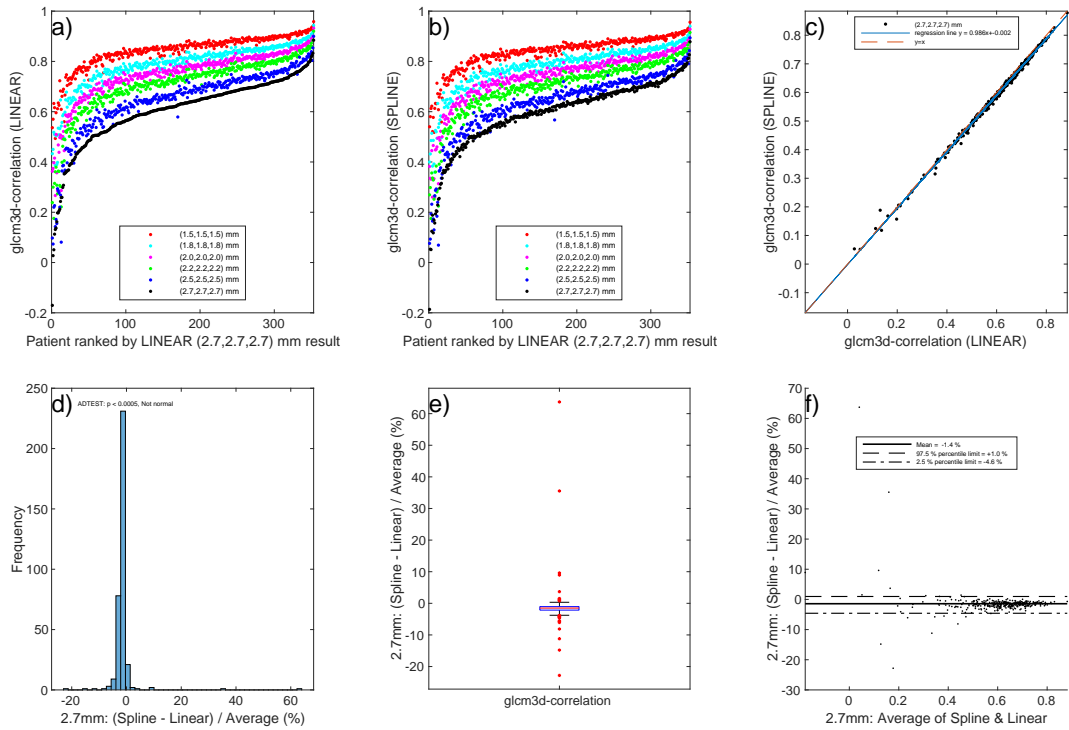

Figure 11: glcm3d-correlation

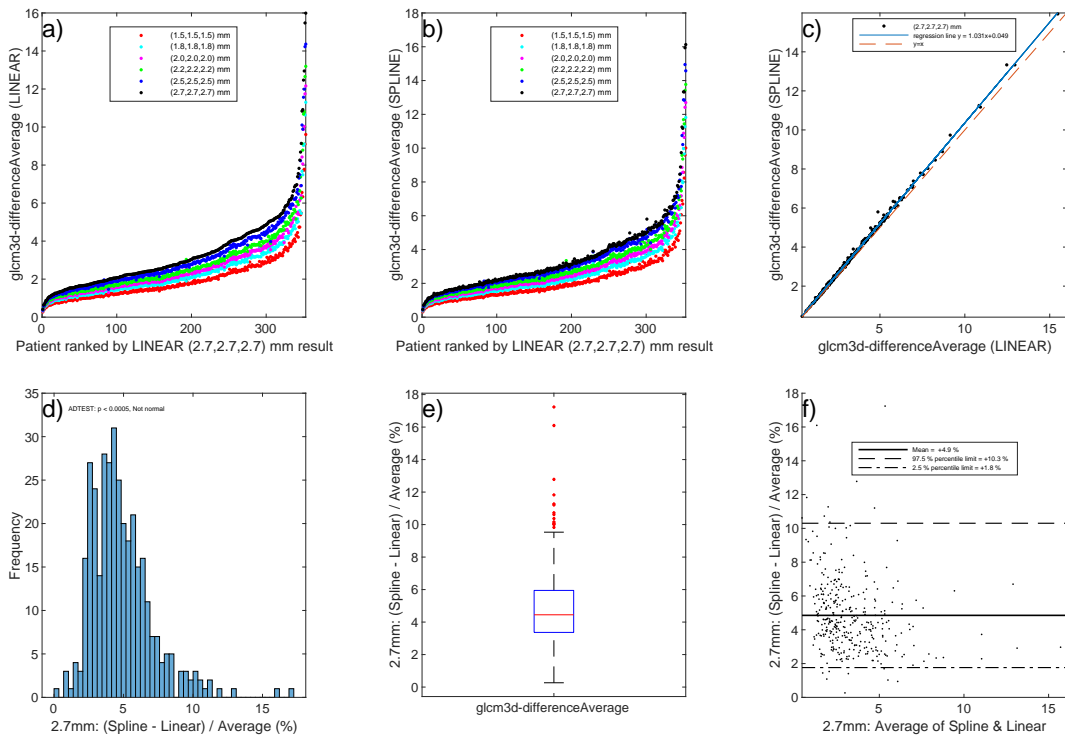

Figure 12: glcm3d-differenceAverage

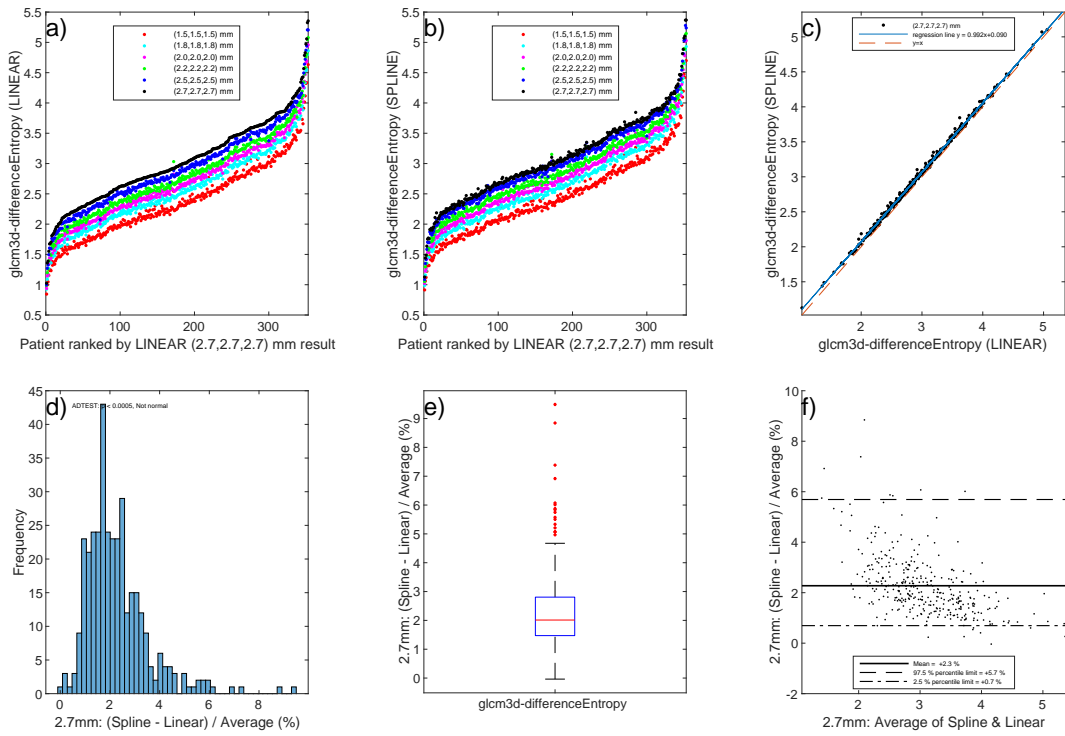

Figure 13: glcm3d-differenceEntropy

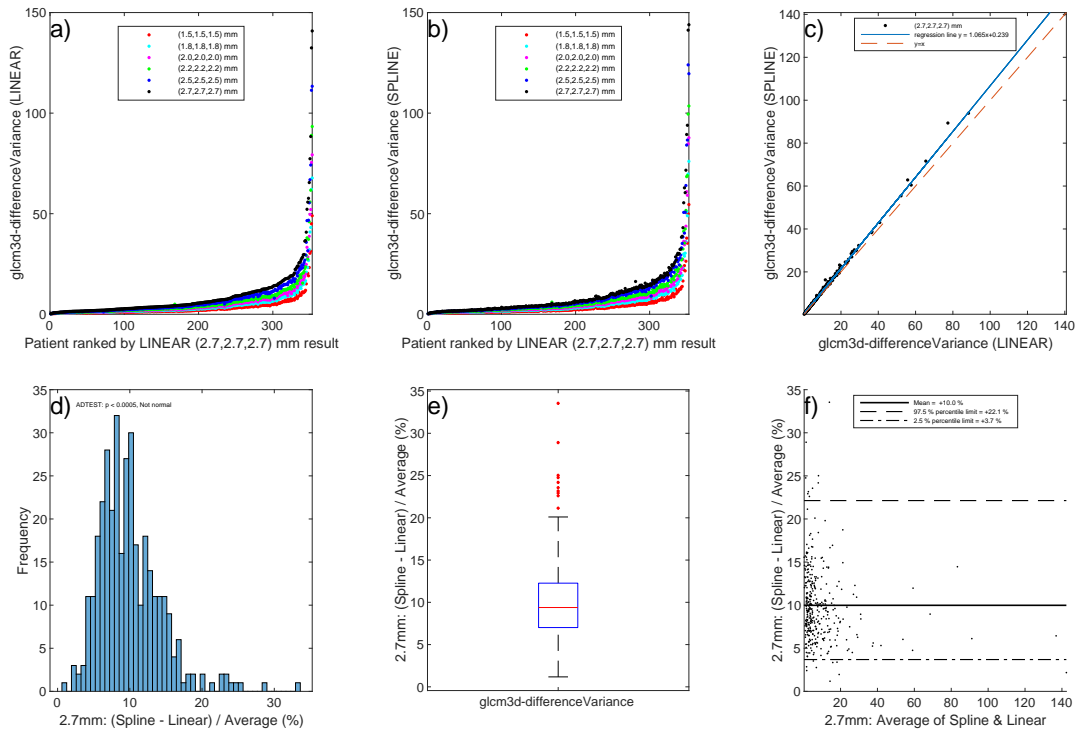

Figure 14: gcm3d-differenceVariance

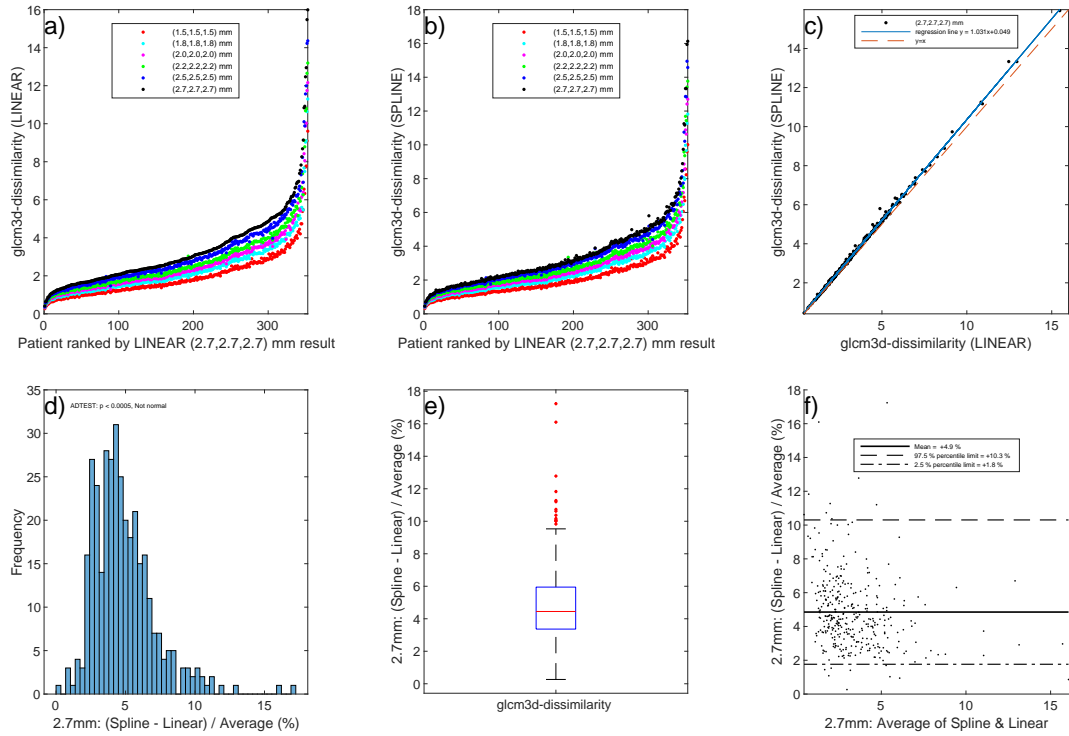

Figure 15: gcm3d-dissimilarity

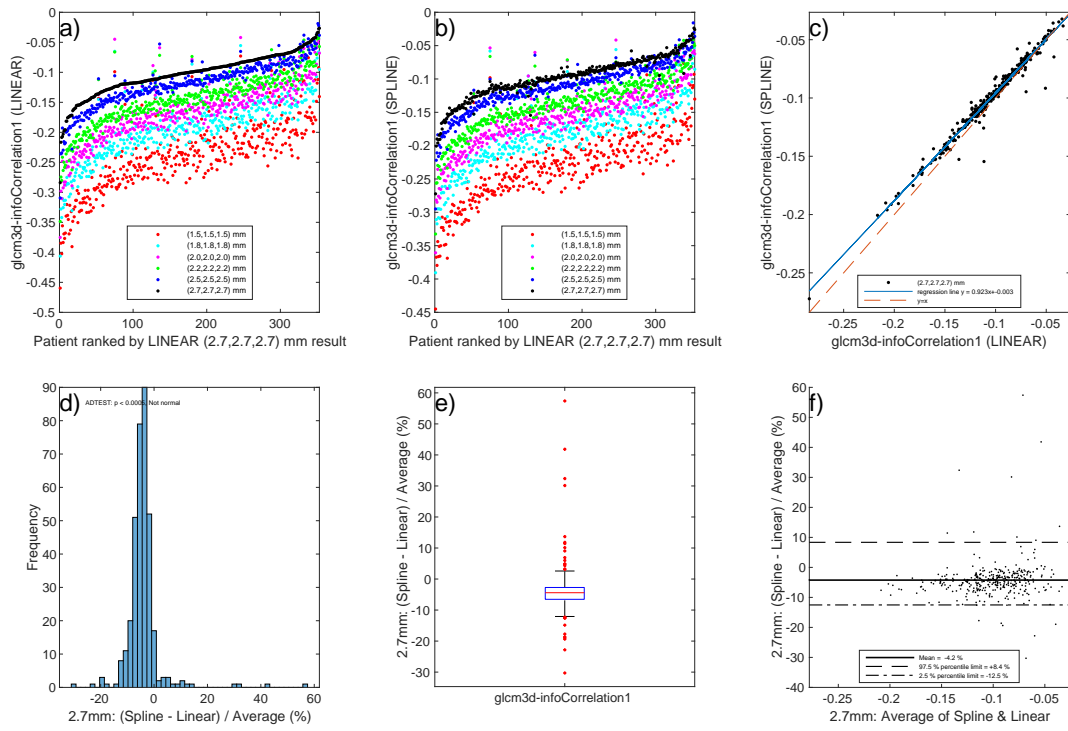

Figure 16: glcm3d-infoCorrelation1

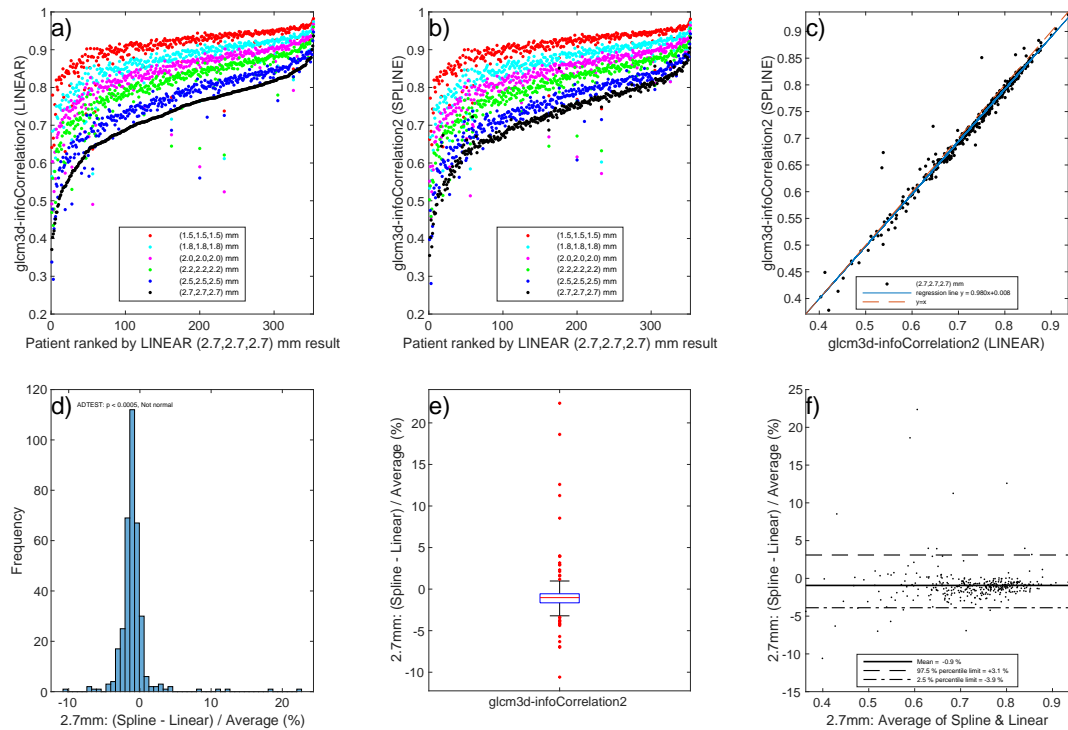

Figure 17: glcm3d-infoCorrelation2

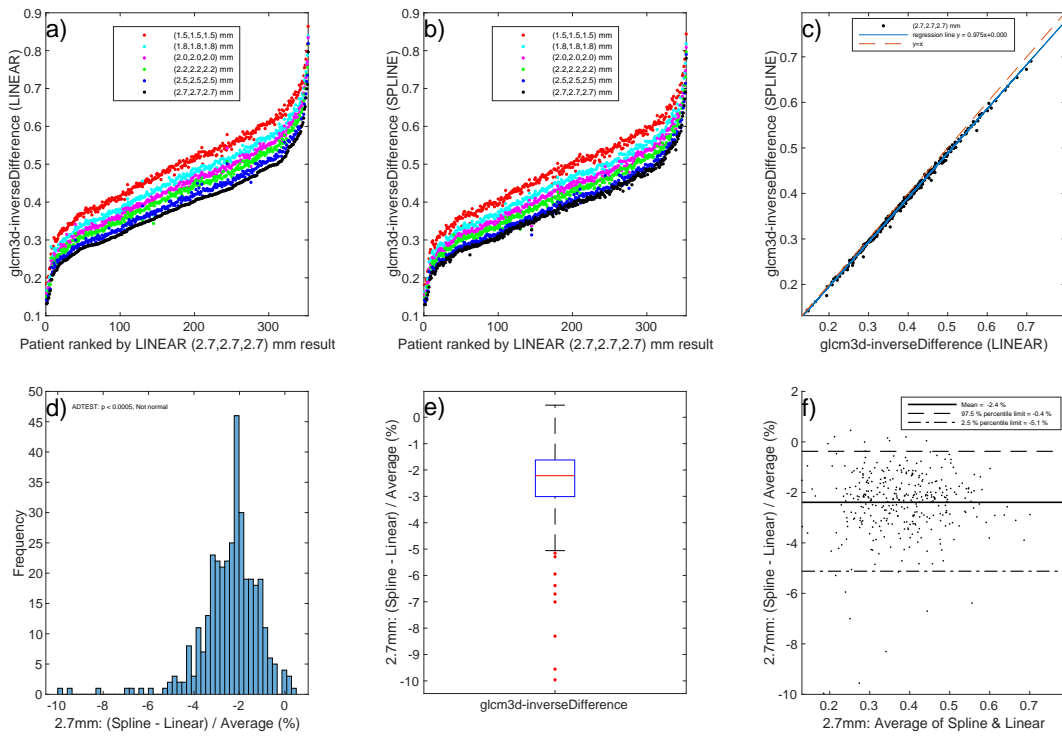

Figure 18: glcm3d-inverseDifference

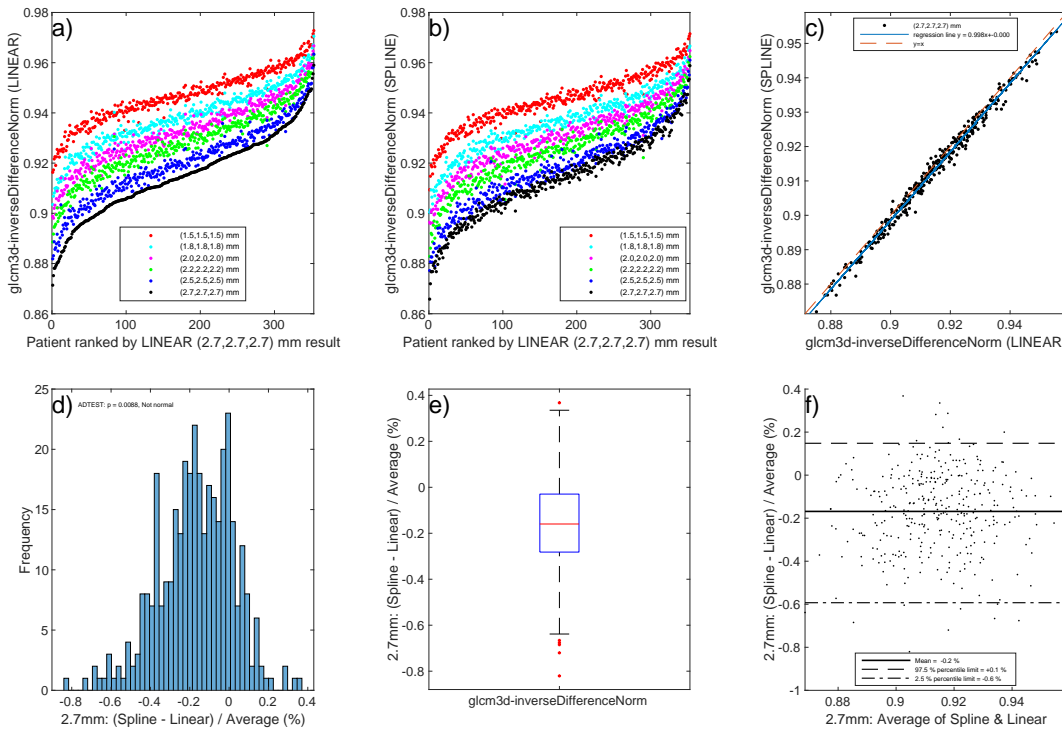

Figure 19: glcm3d-inverseDifferenceNorm



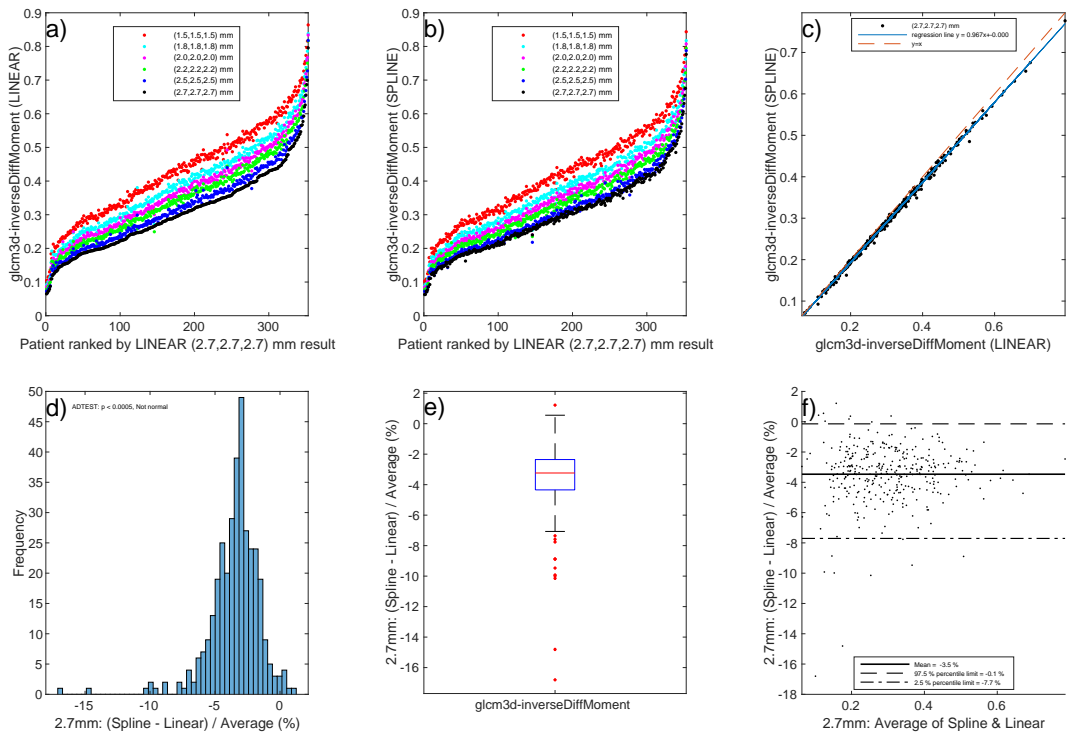

Figure 20:  $g lcm3d-inverseDiffMoment$

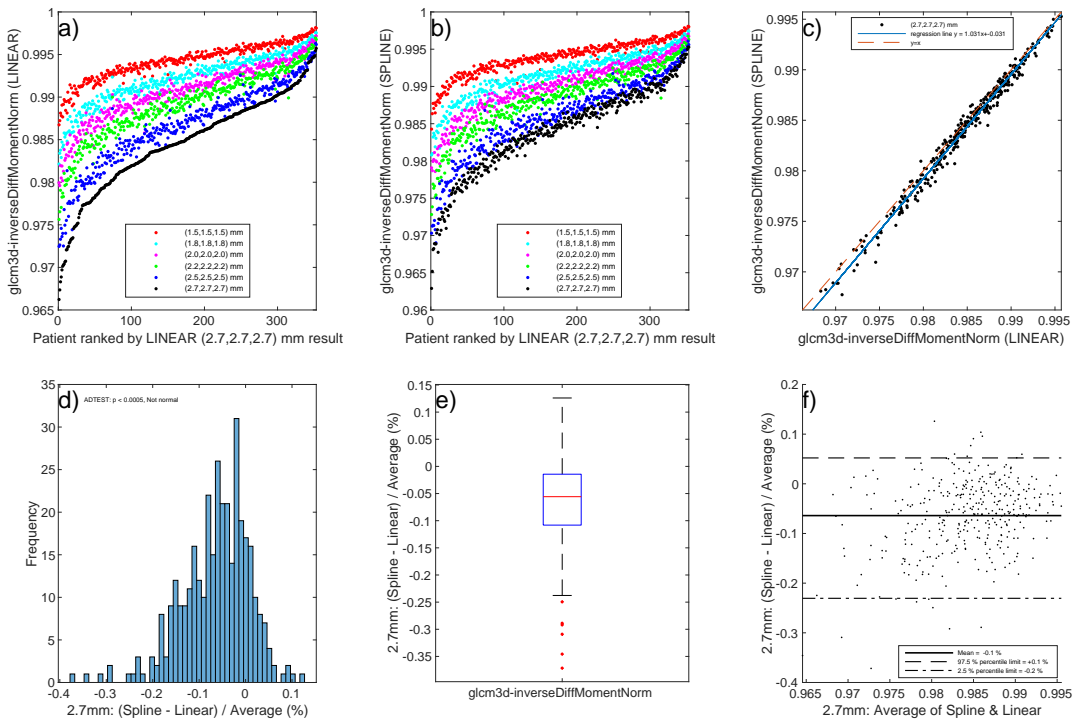

Figure 21:  $g lcm3d-inverseDiffMomentNorm$

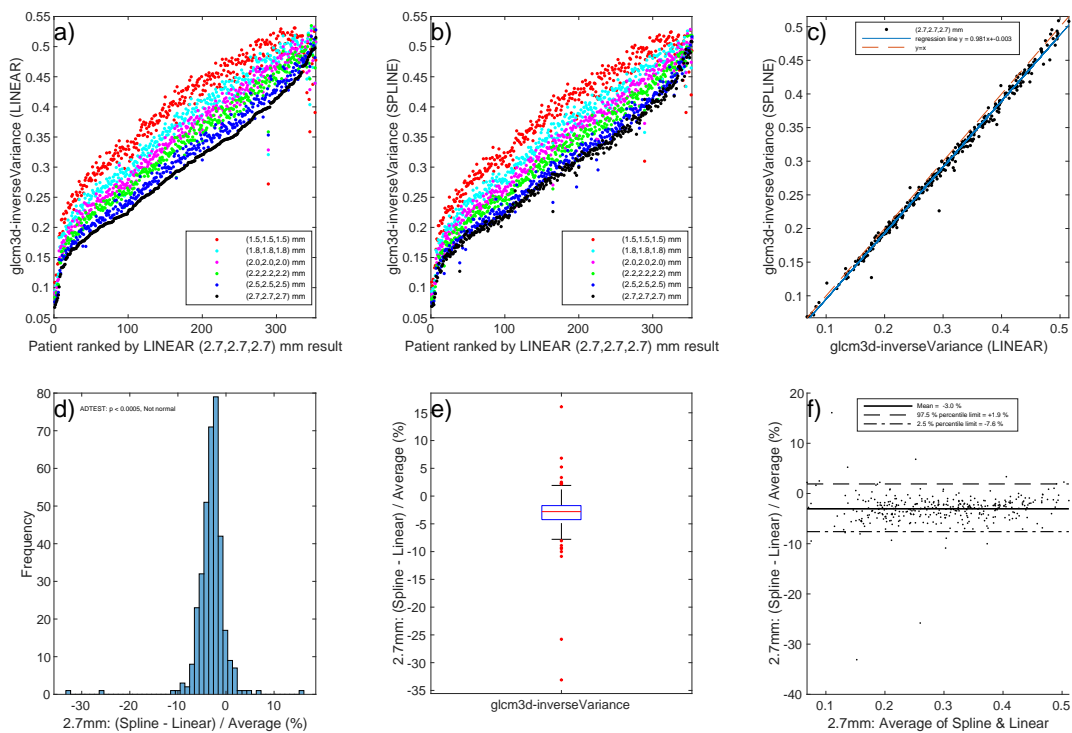

Figure 22: glcm3d-inverseVariance

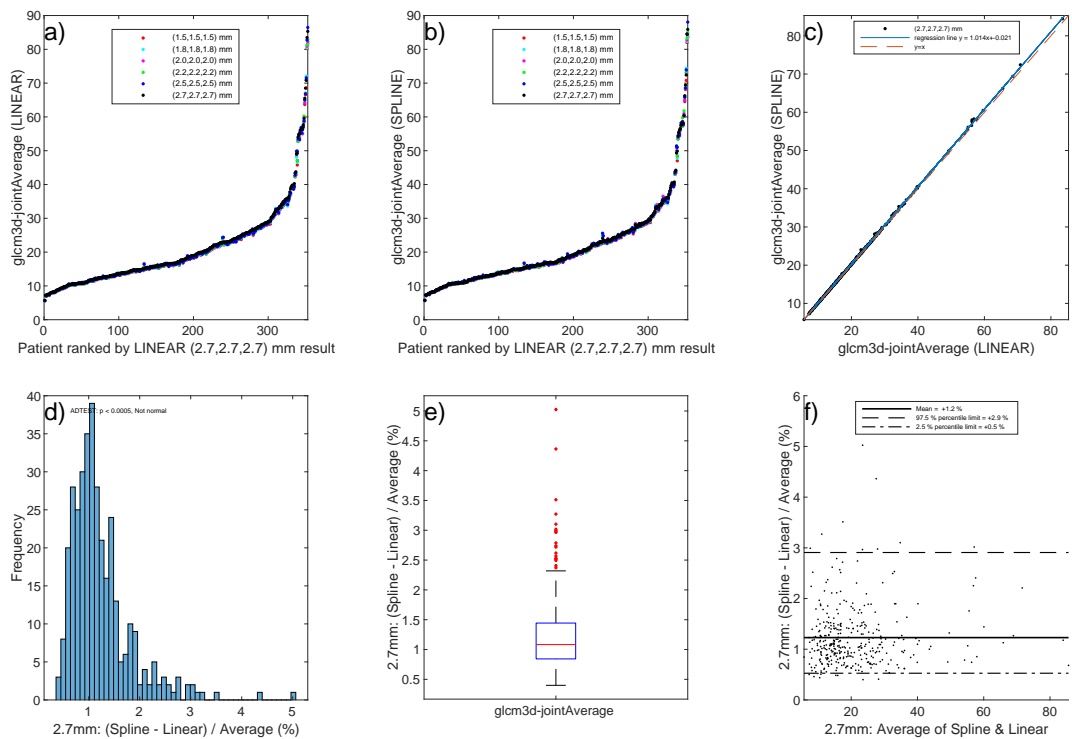

Figure 23: glcm3d-jointAverage

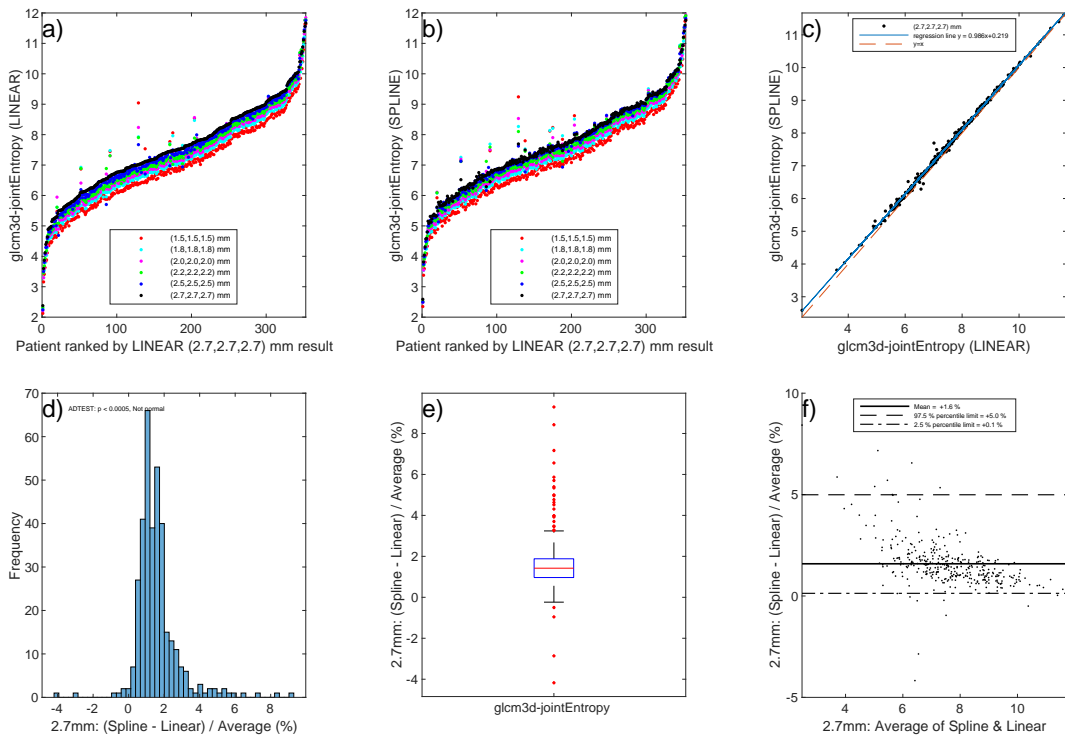

Figure 24: glcm3d-jointEntropy

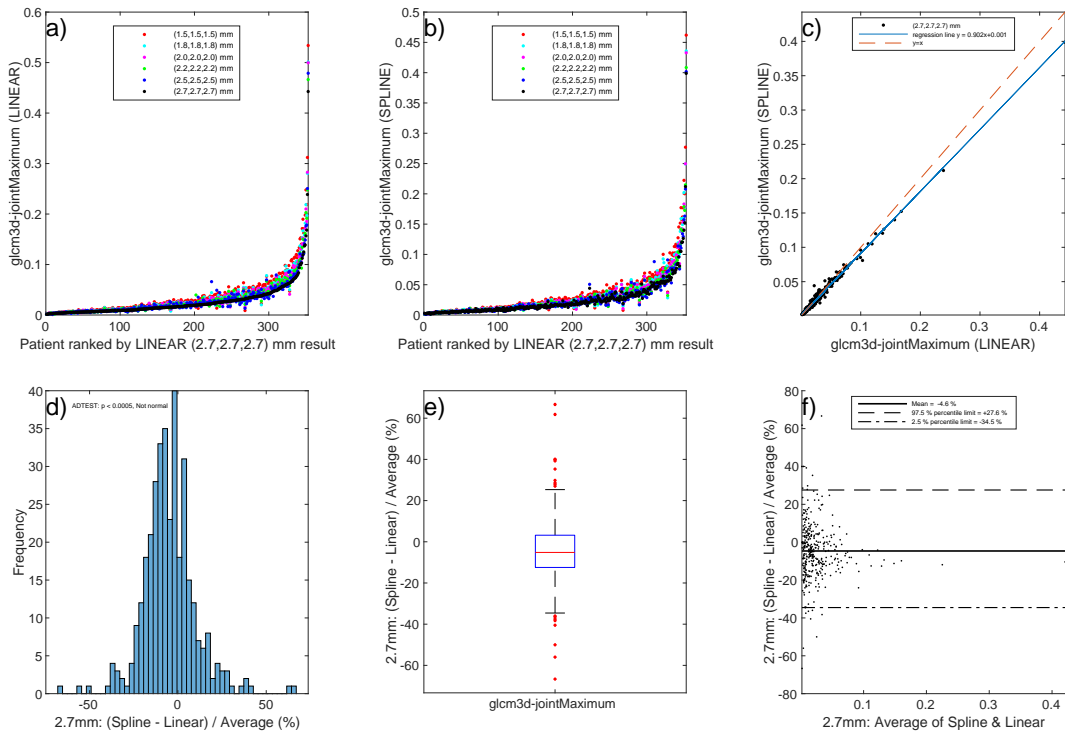

Figure 25: glcm3d-jointMaximum

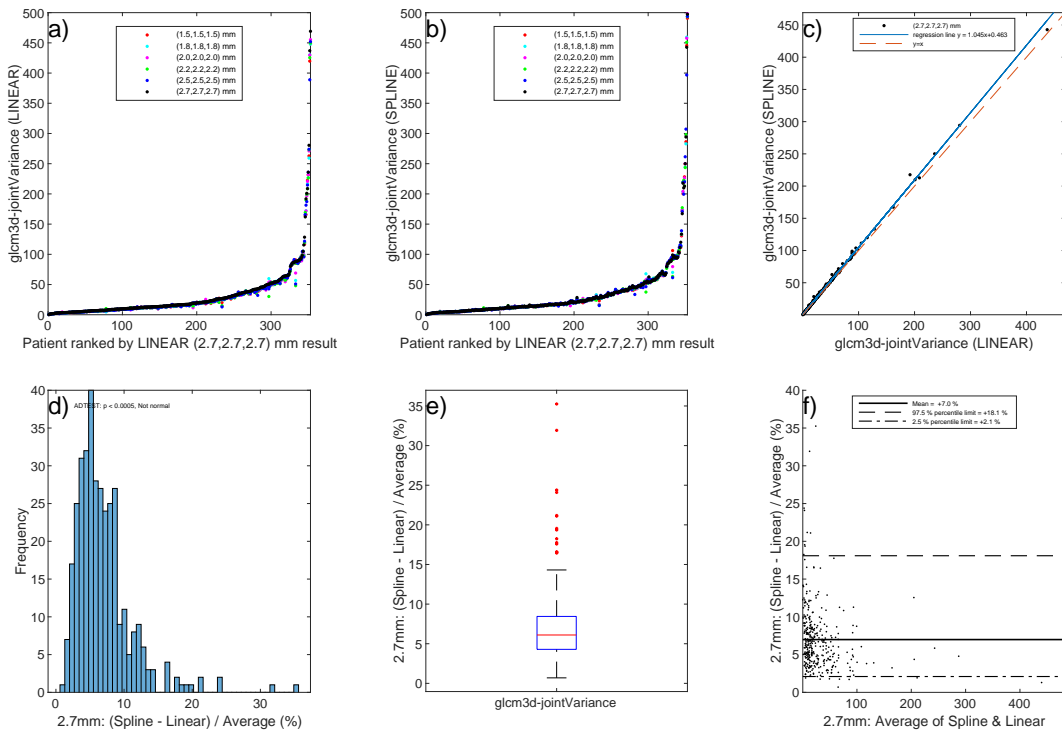

Figure 26: glcm3d-jointVariance

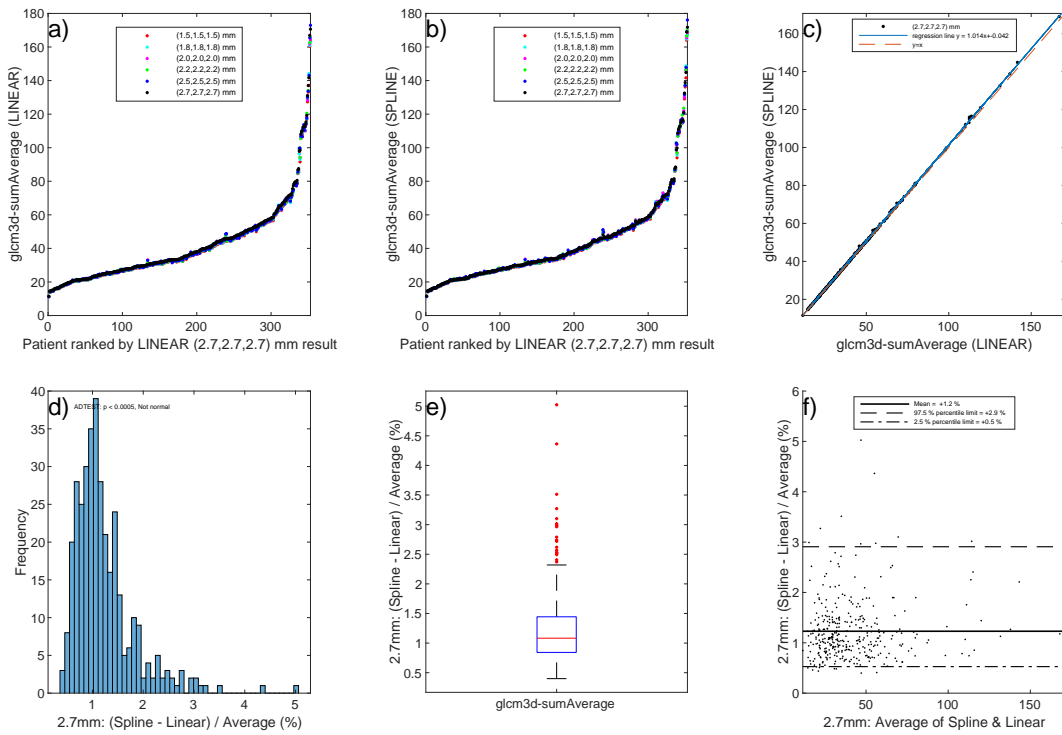

Figure 27: glcm3d-sumAverage

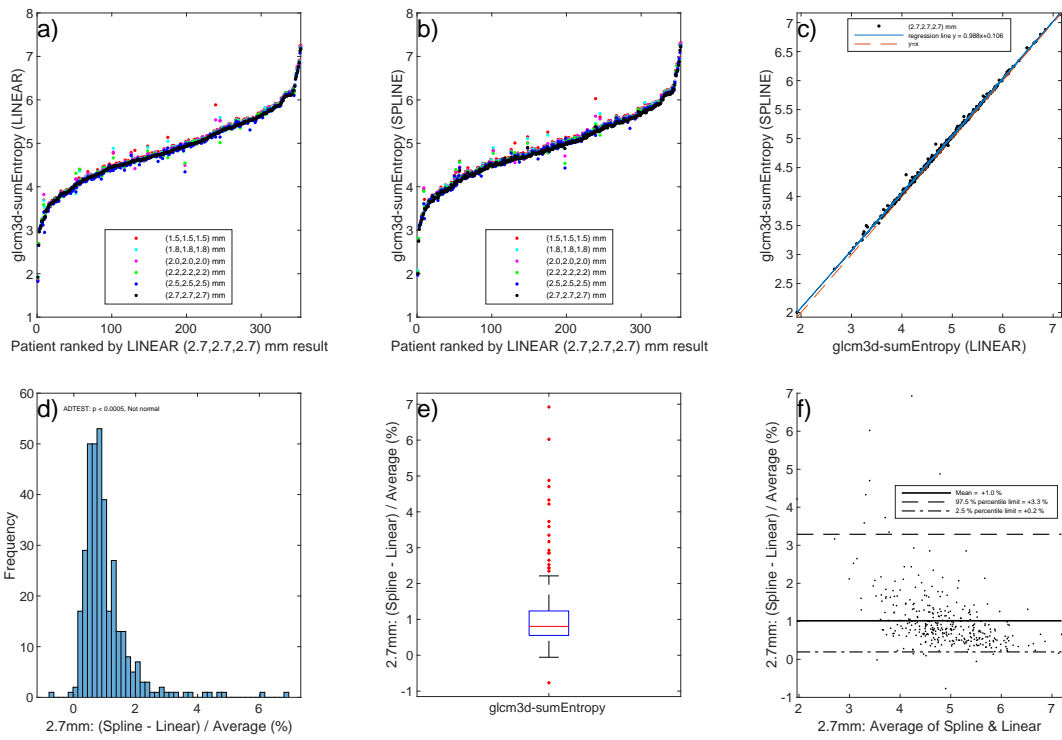

Figure 28: glcm3d-sumEntropy

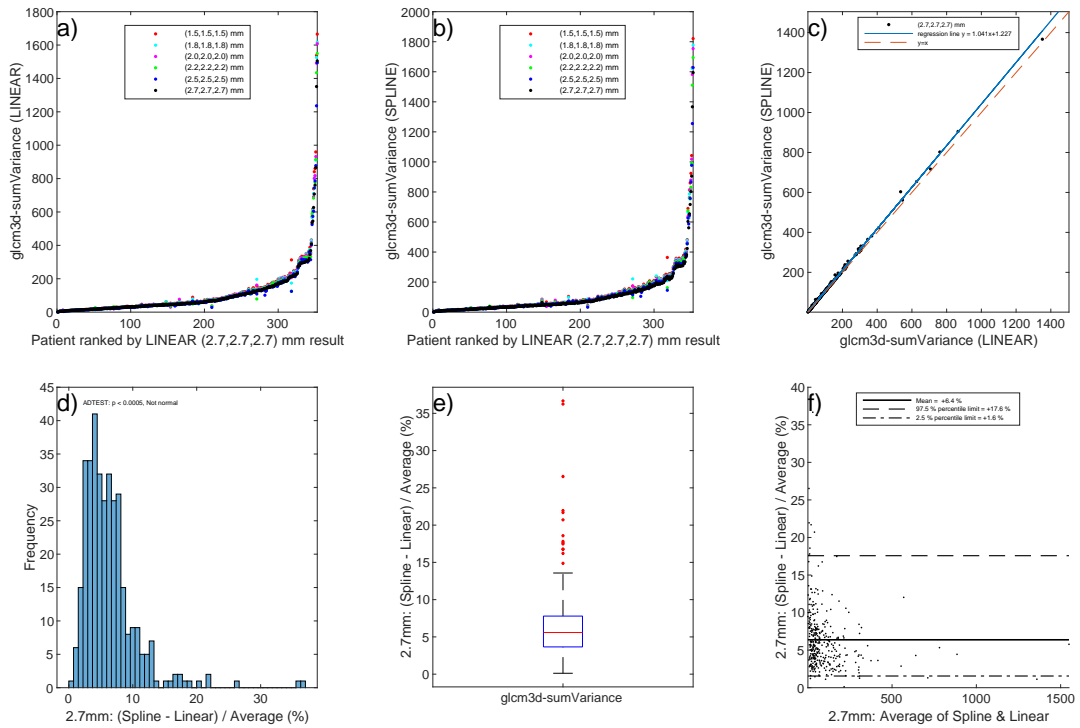

Figure 29: glcm3d-sumVariance

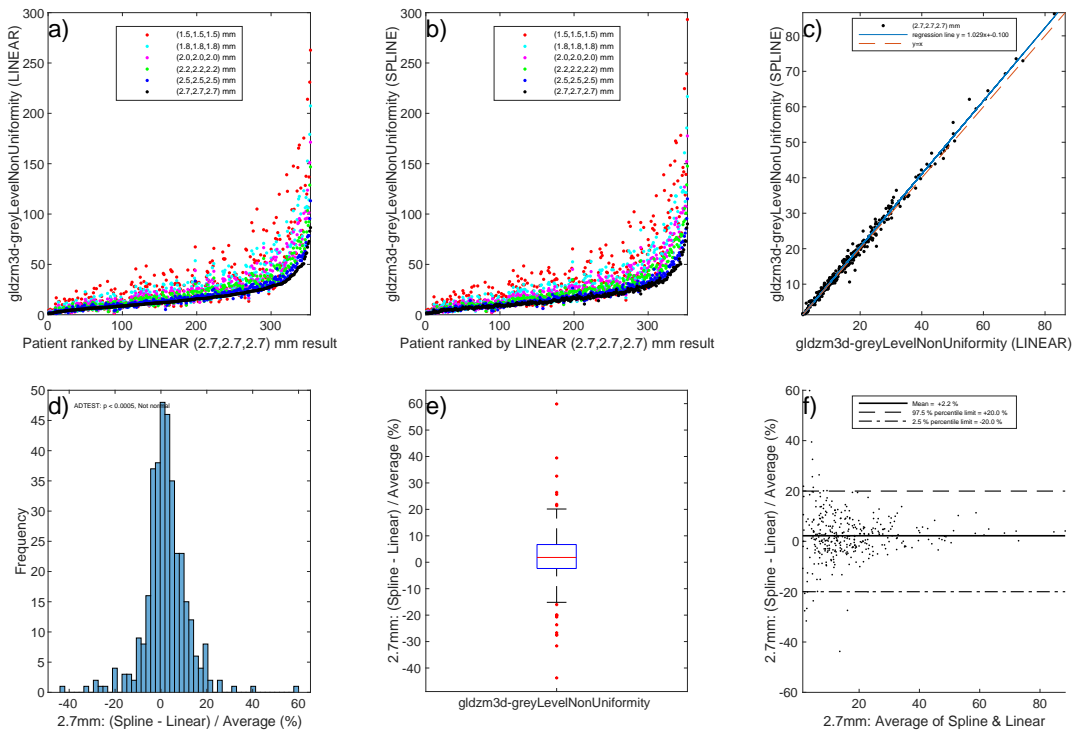

Figure 30: gldzm3d-greyLevelNonUniformity

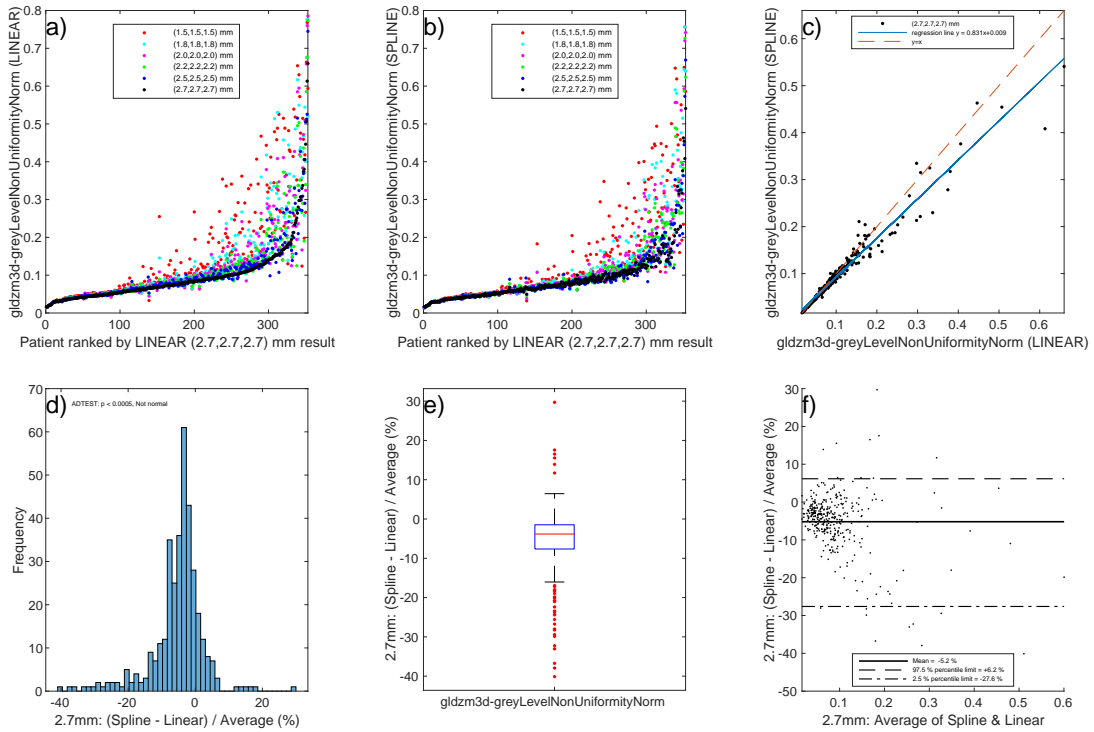

Figure 31: gldzm3d-greyLevelNonUniformityNorm

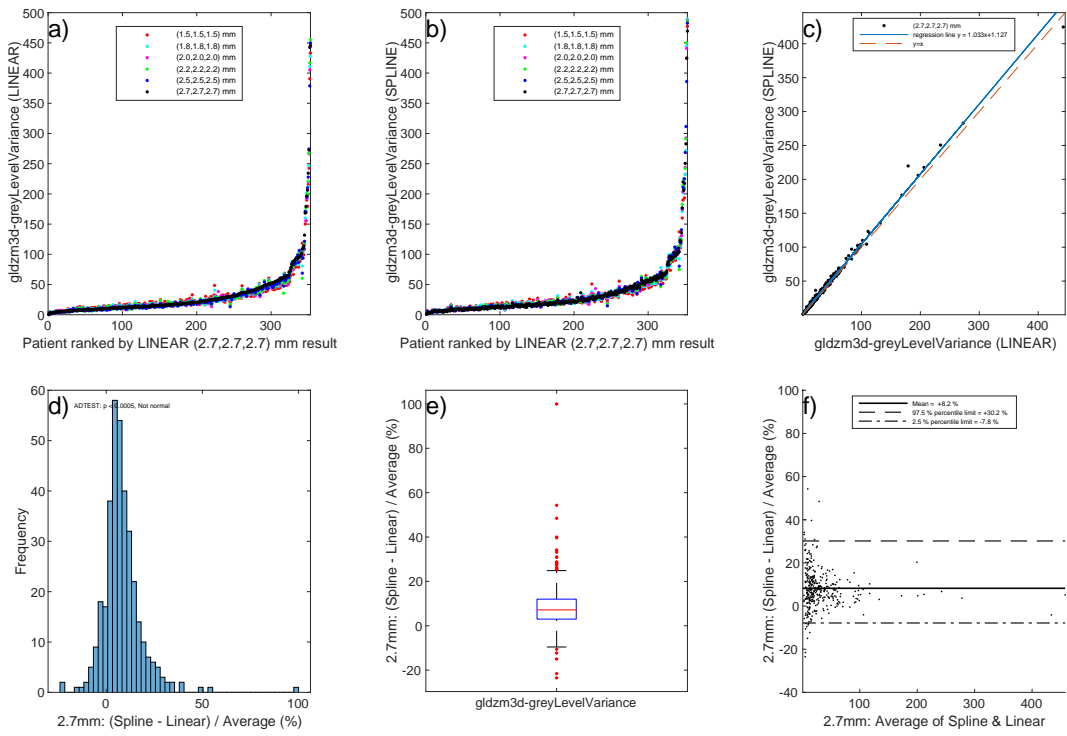

Figure 32: gldzm3d-greyLevelVariance

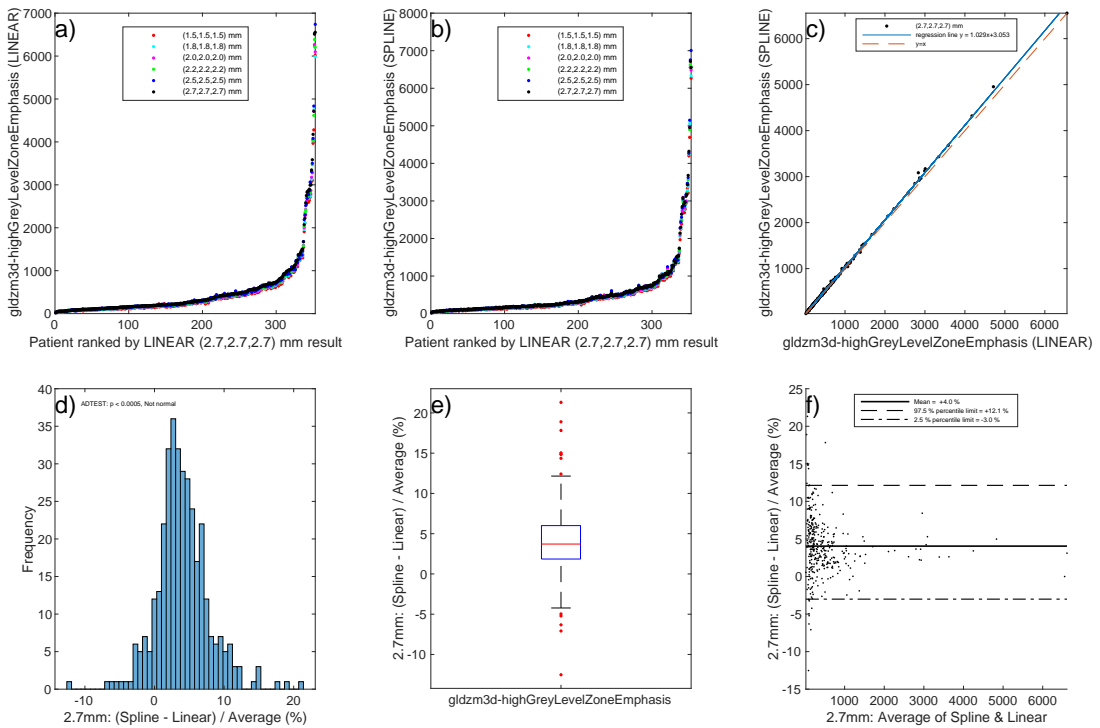

Figure 33: gldzm3d-highGreyLevelZoneEmphasis

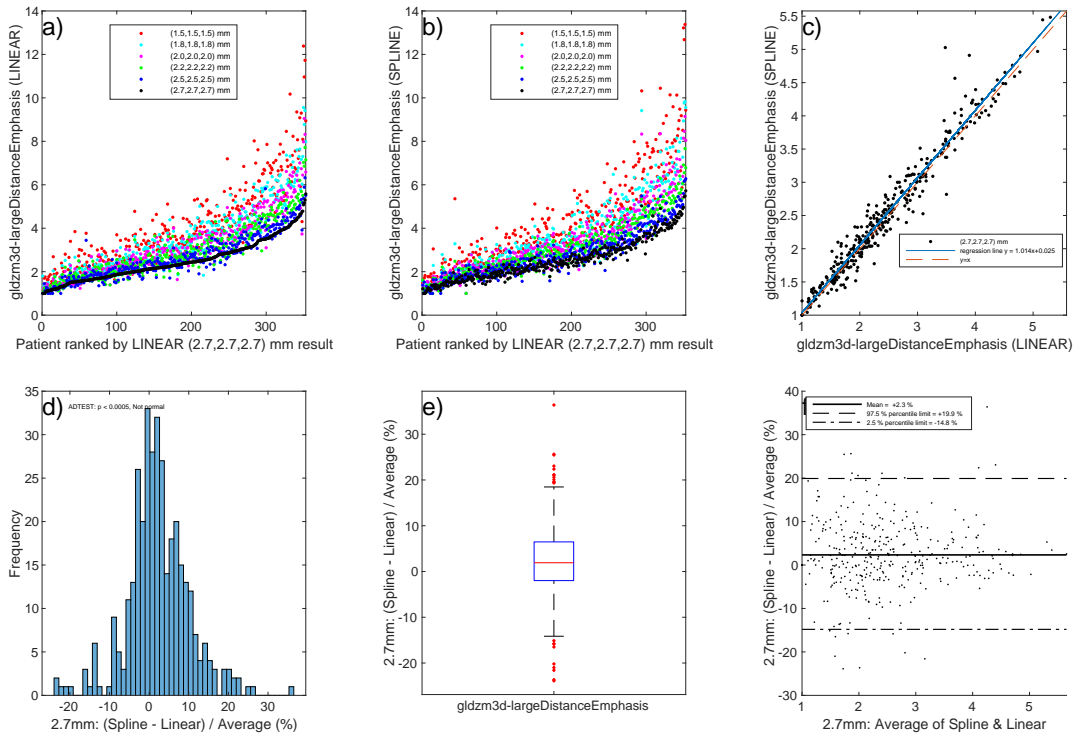

Figure 34: `gldzm3d-largeDistanceEmphasis`

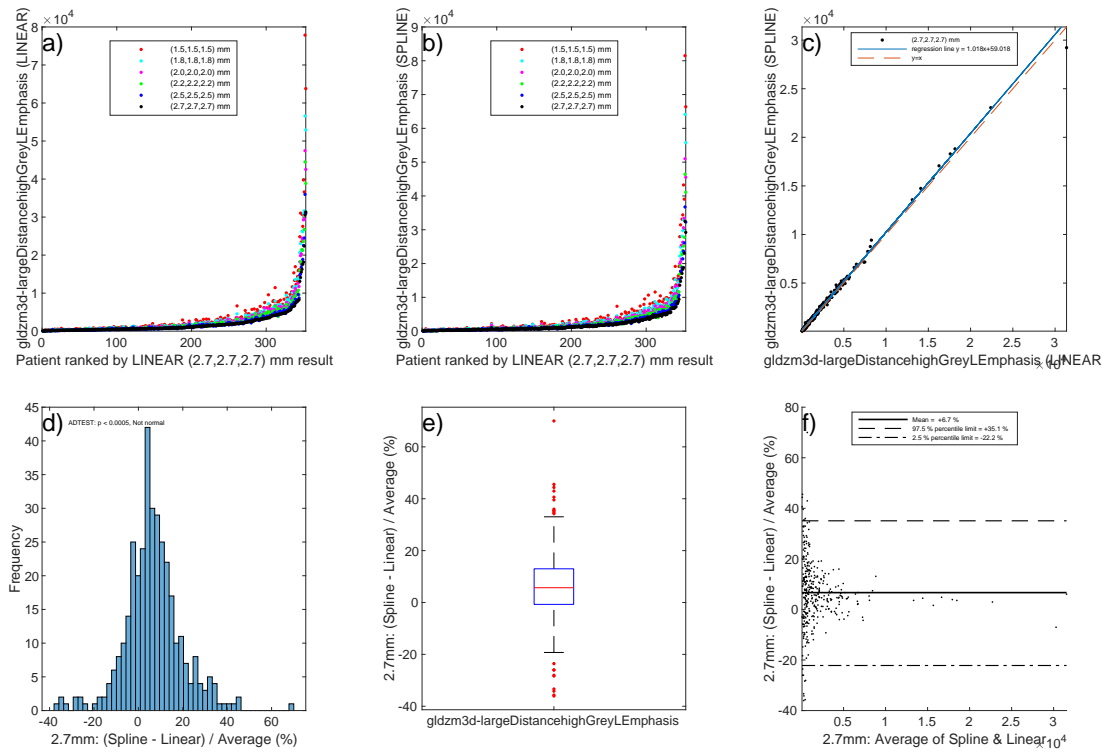

Figure 35: `gldzm3d-largeDistancelargeGreyLEmphasis`



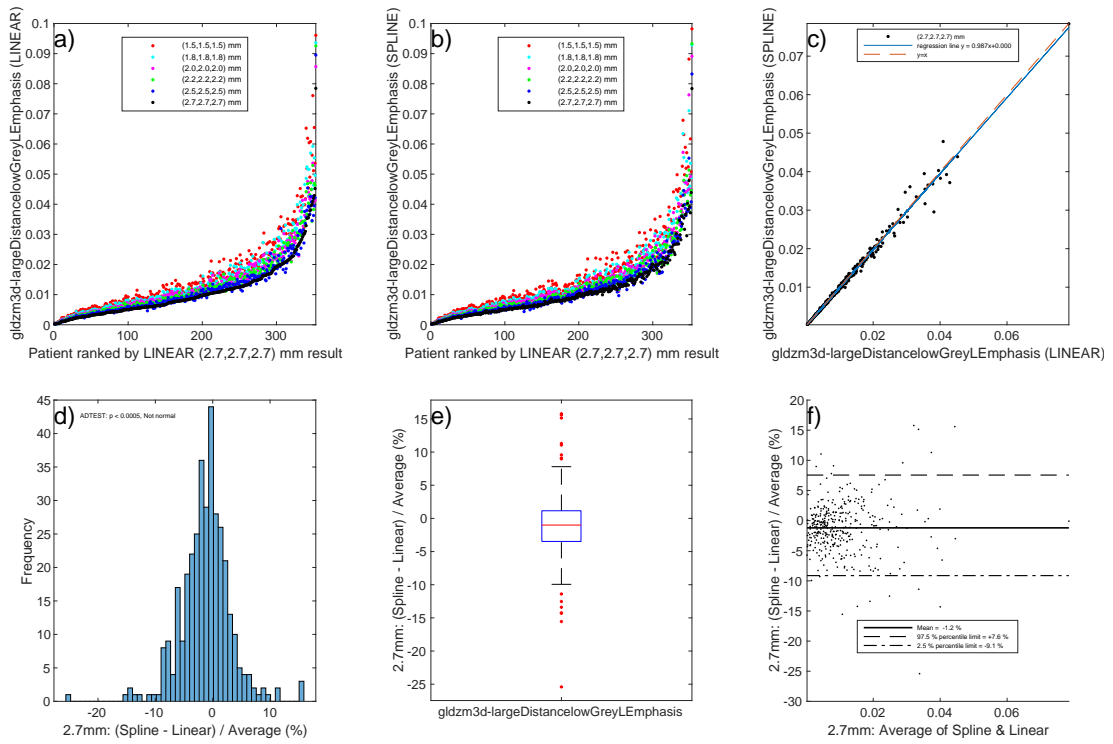

Figure 36: gldzm3d-largeDistancelowGreyLEmphasis

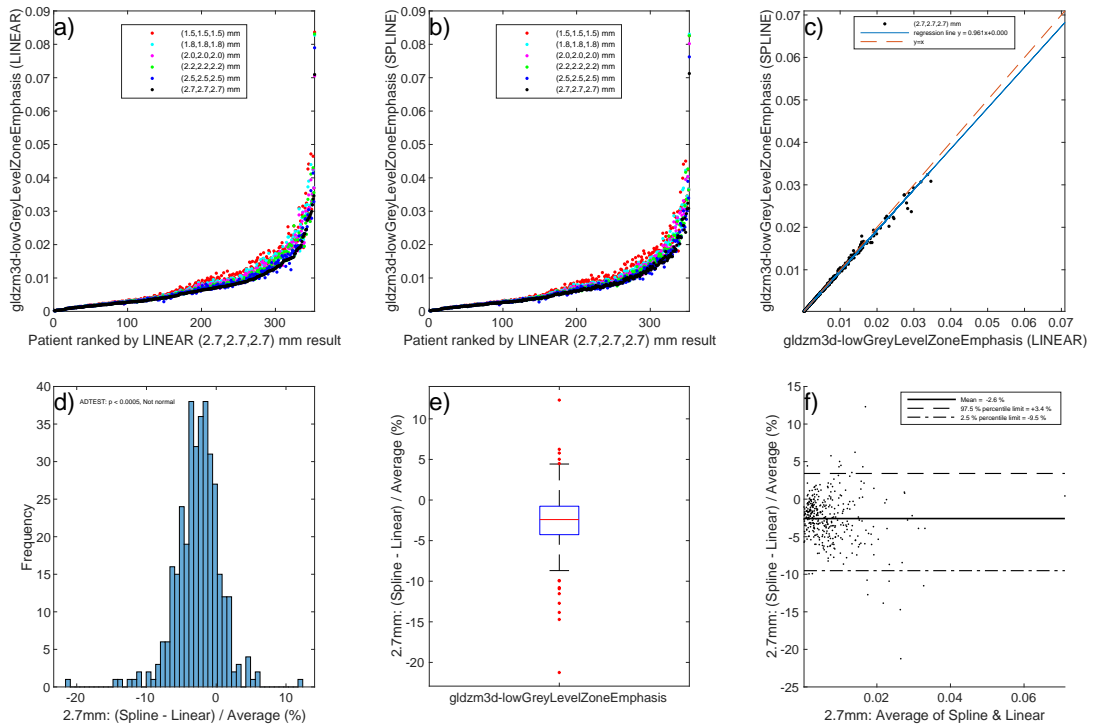

Figure 37: gldzm3d-lowGreyLevelZoneEmphasis

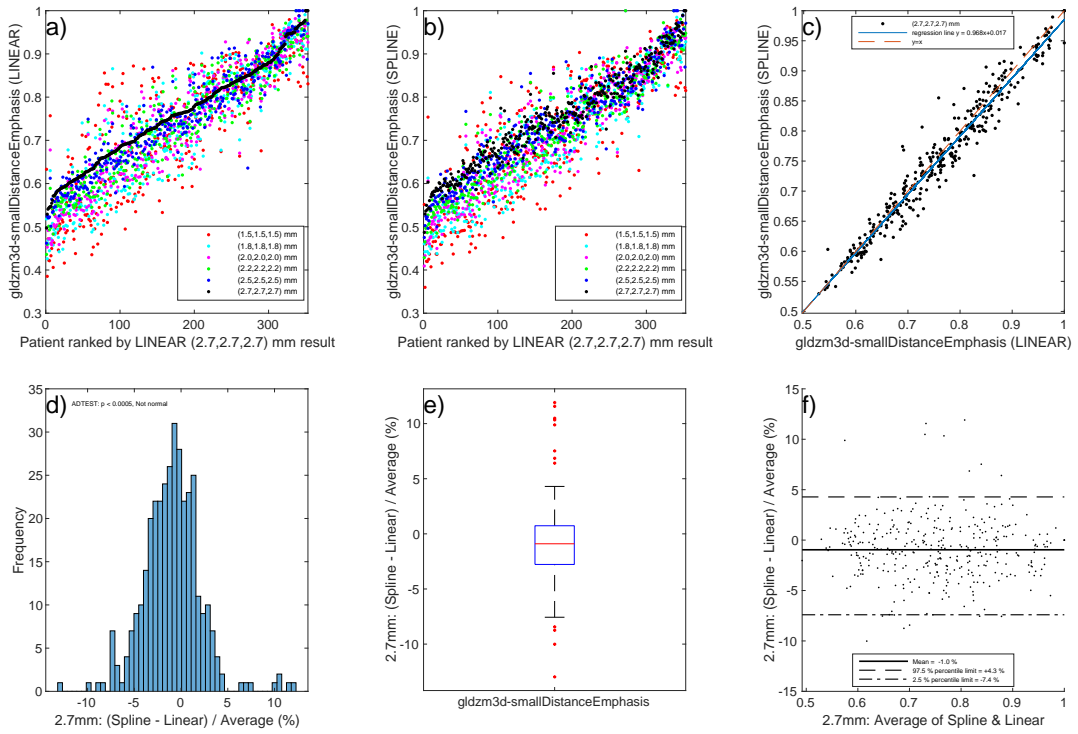

Figure 38: gldzm3d-smallDistanceEmphasis

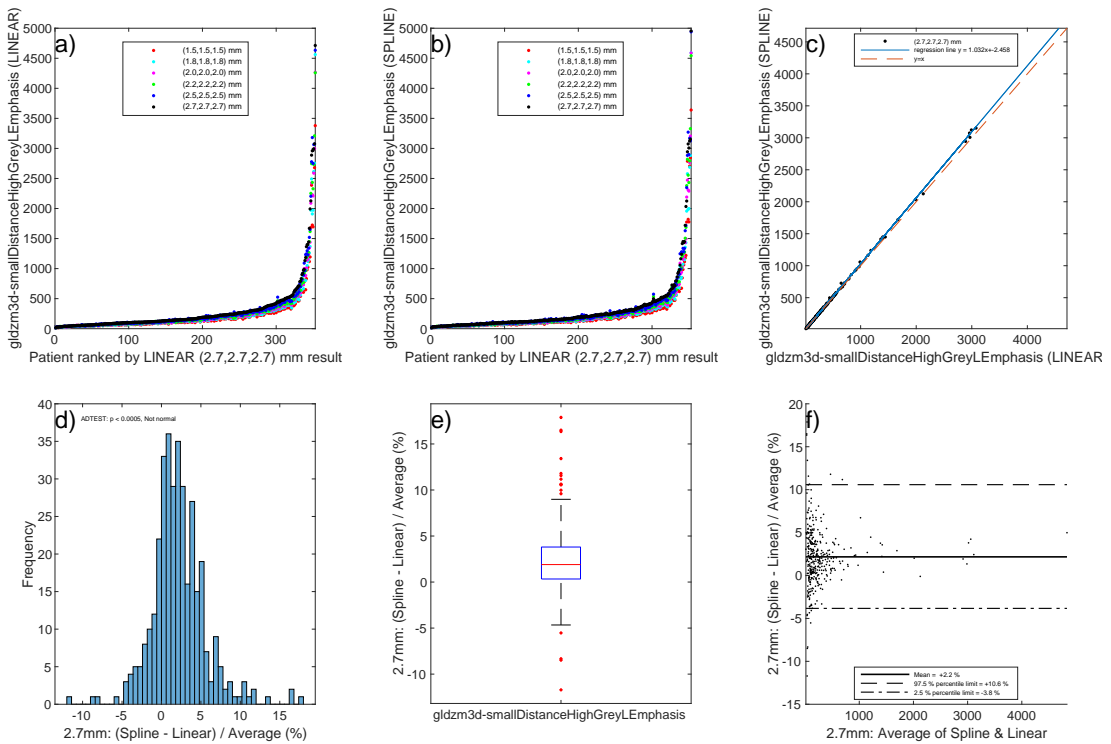

Figure 39: gldzm3d-smallDistanceHighGreyLEmphasis

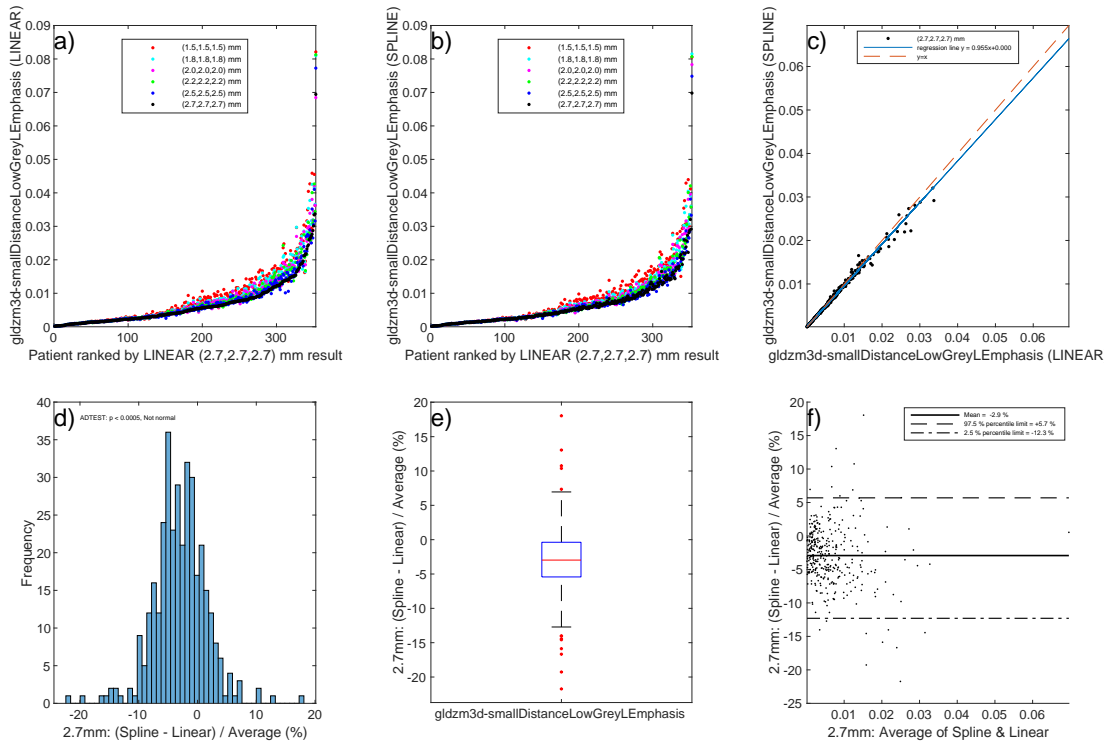

Figure 40: gldzm3d-smallDistanceLowGreyLEmphasis

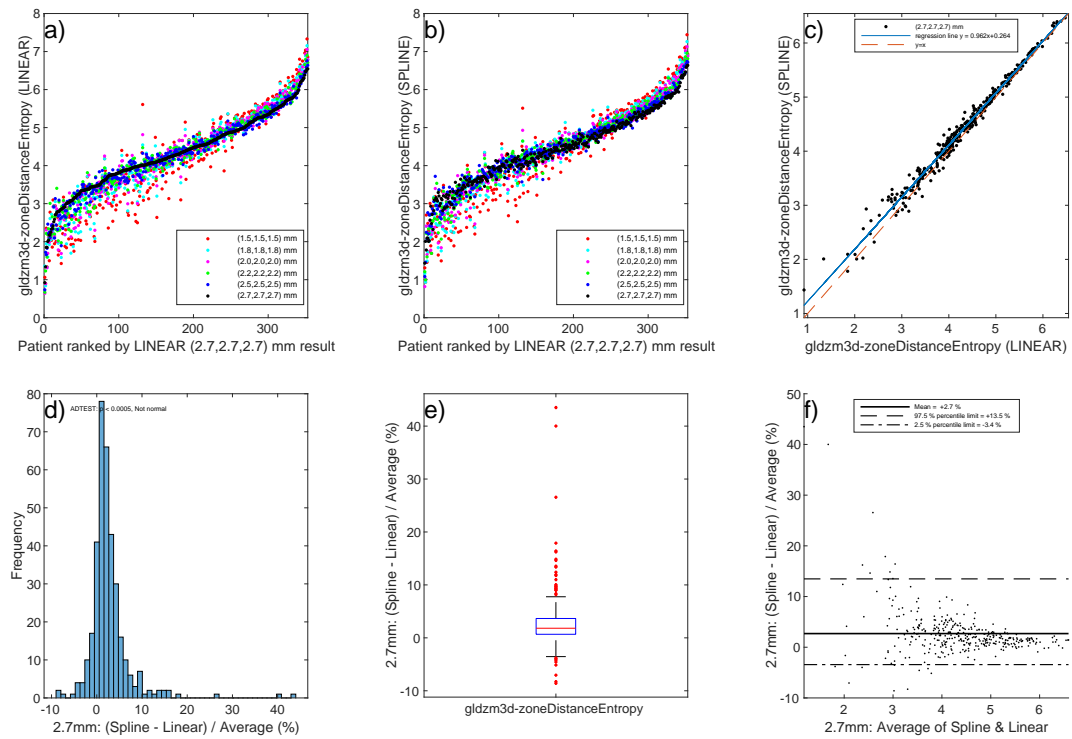

Figure 41: gldzm3d-zoneDistanceEntropy

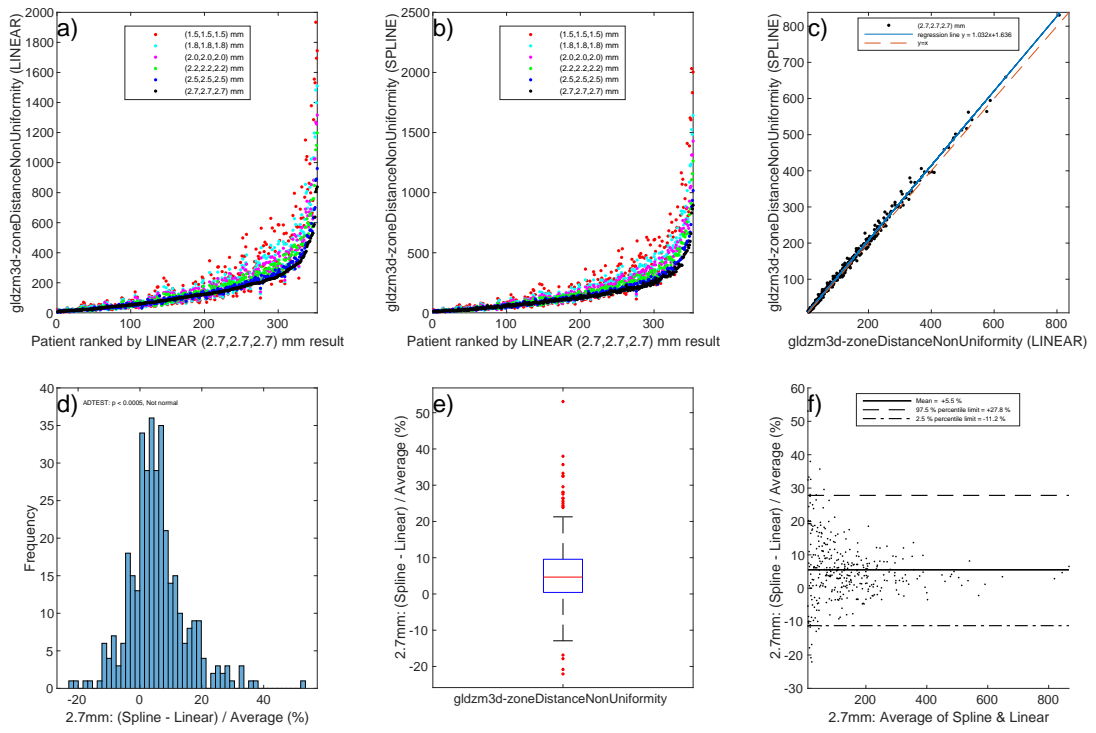

Figure 42: gldzm3d-zoneDistanceNonUniformity

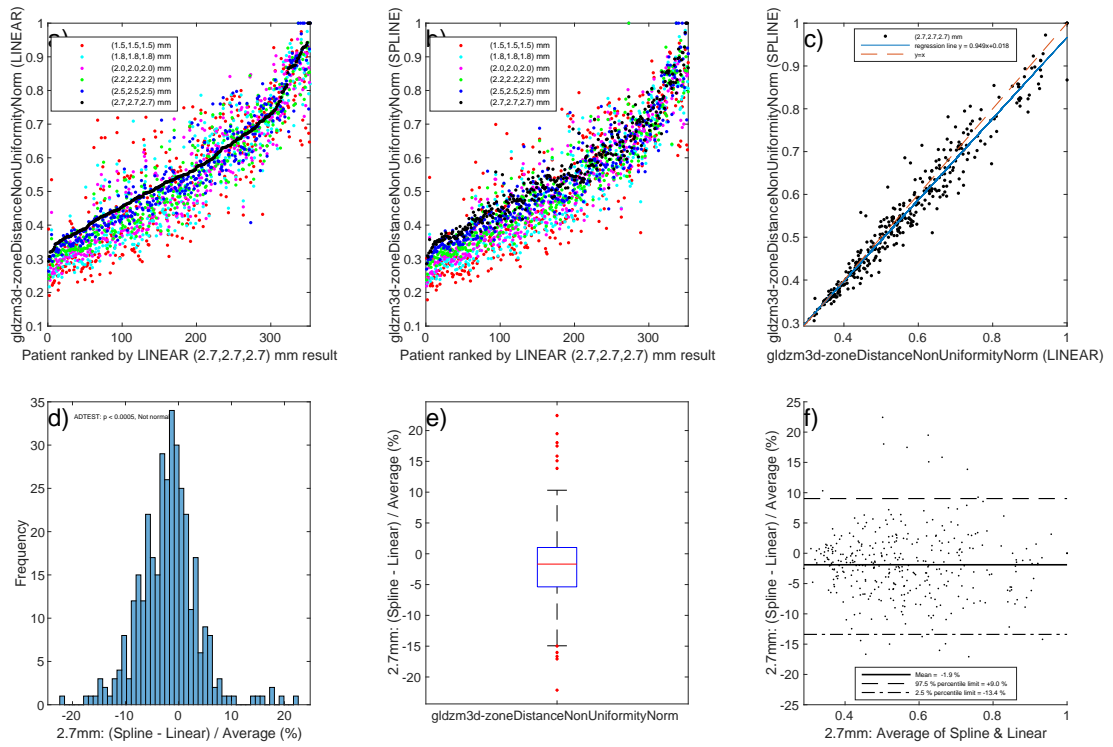

Figure 43: gldzm3d-zoneDistanceNonUniformityNorm

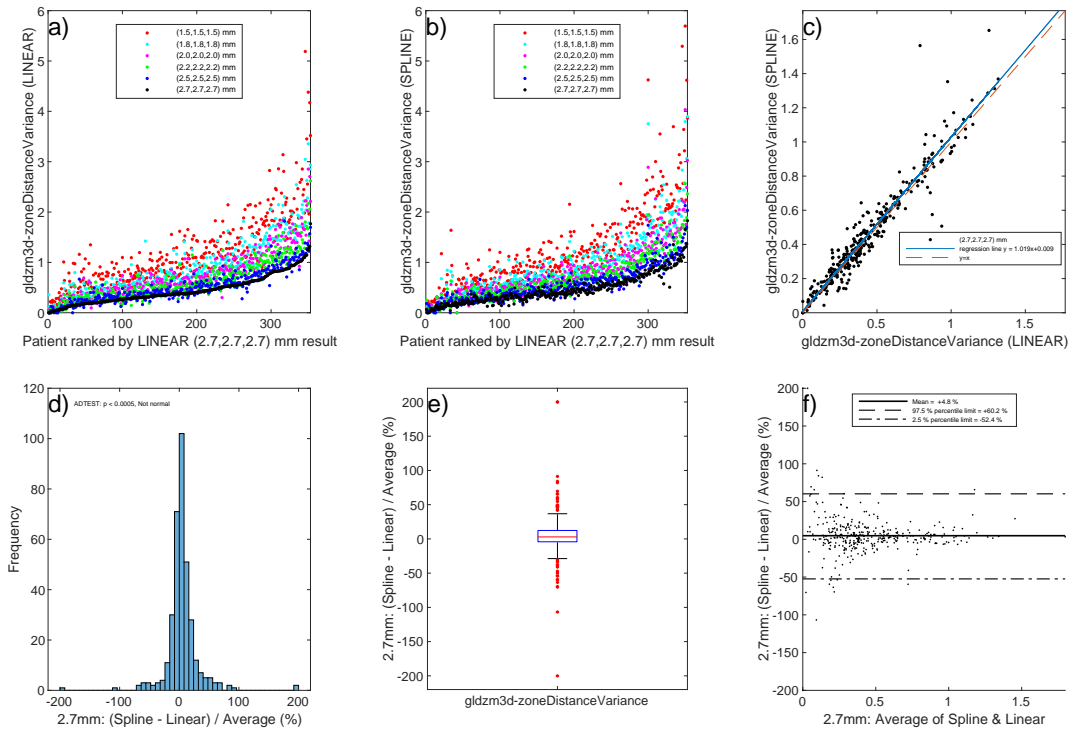

Figure 44: gldzm3d-zoneDistanceVariance

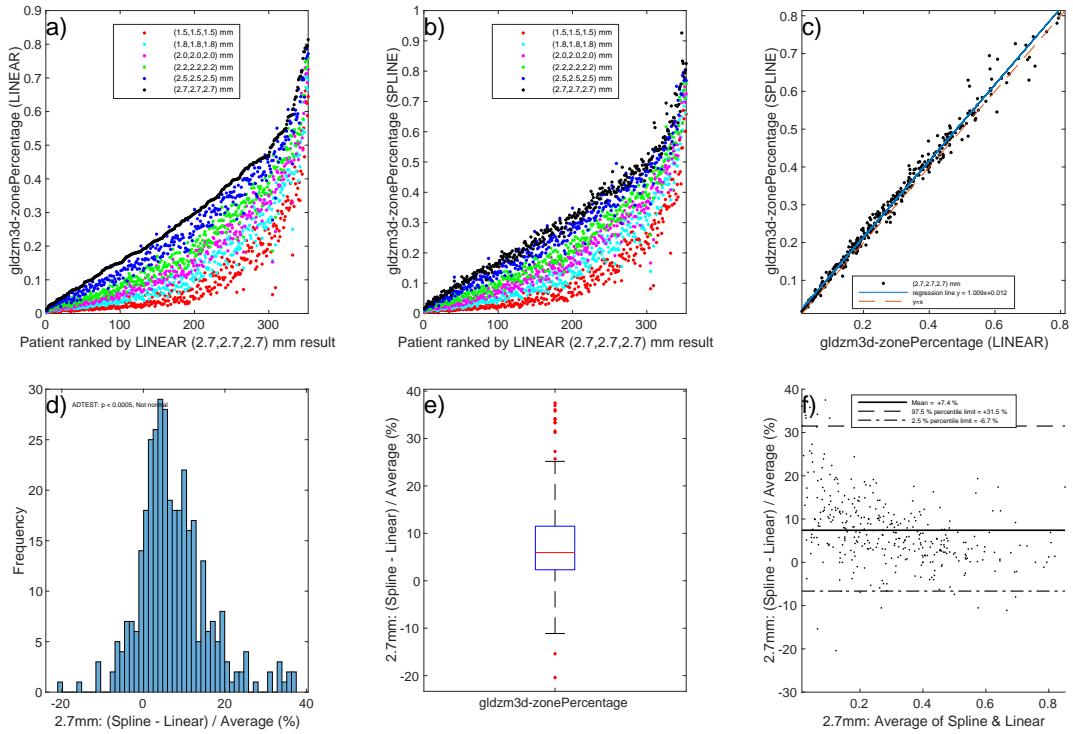

Figure 45: gldzm3d-zonePercentage

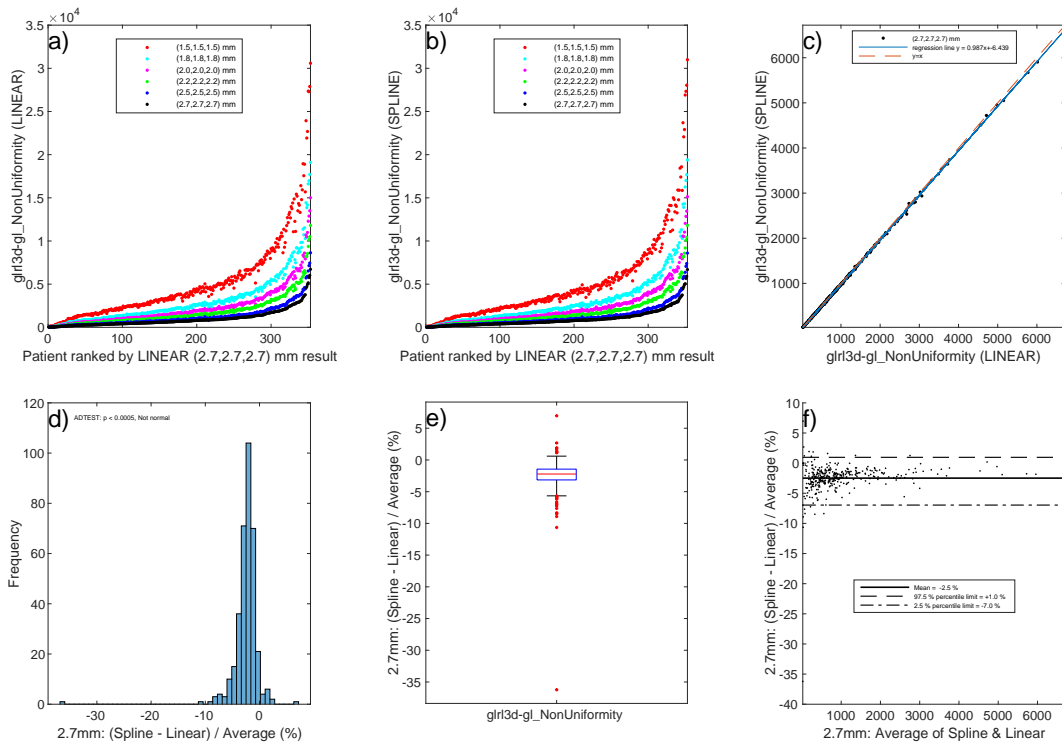

Figure 46: g1r13d-gl-NonUniformity

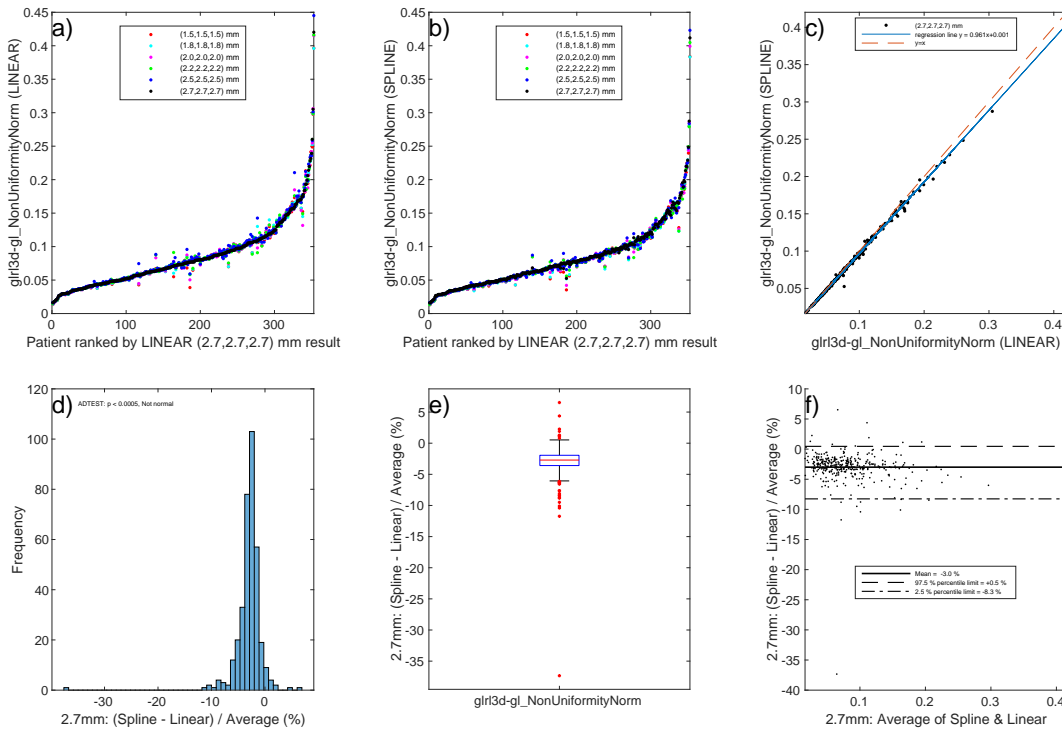

Figure 47: g1r13d-gl-NonUniformityNorm

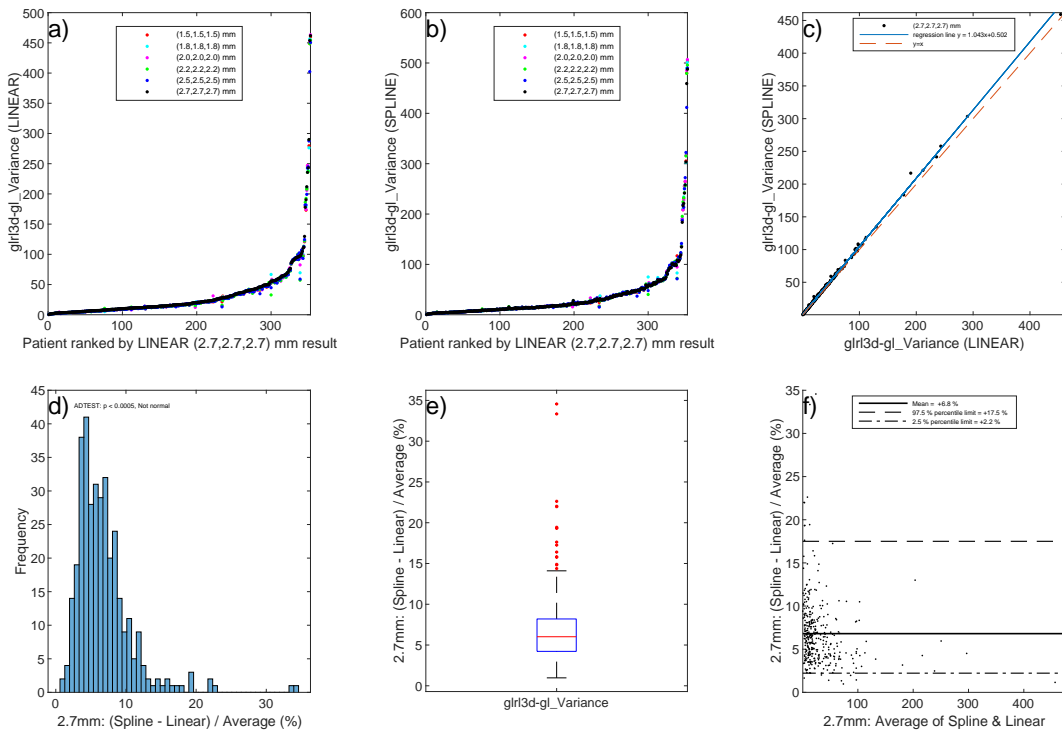

Figure 48: g1rl3d-gl-Variance

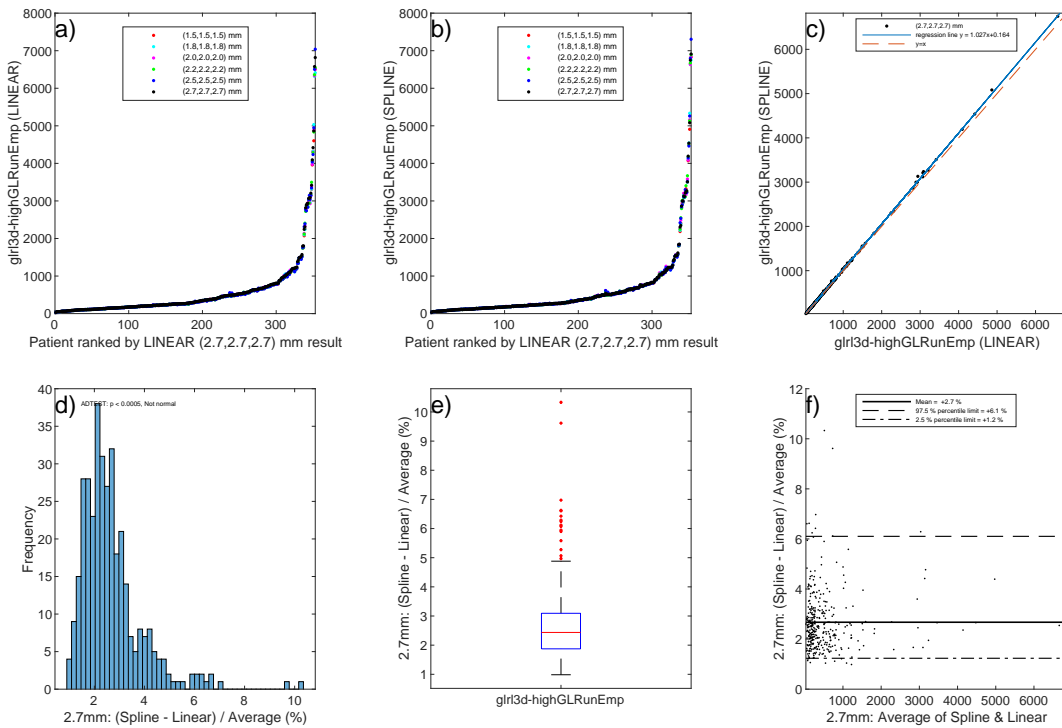

Figure 49: g1rl3d-highGLRunEmp

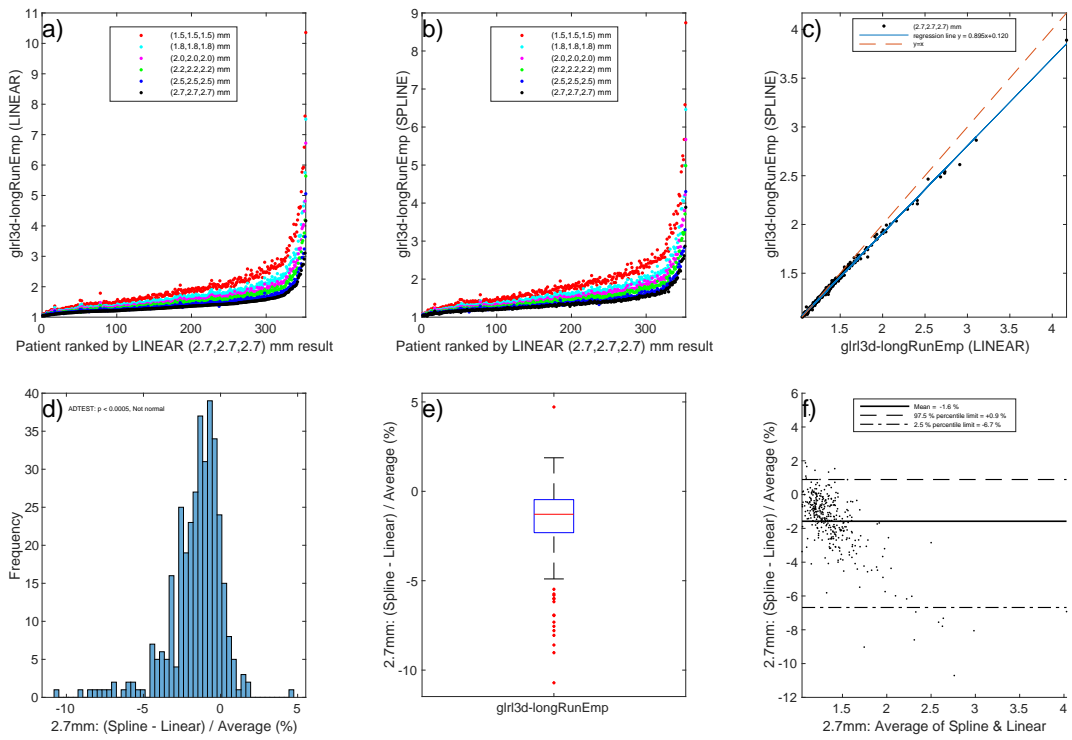

Figure 50: glr13d-longRunEmp

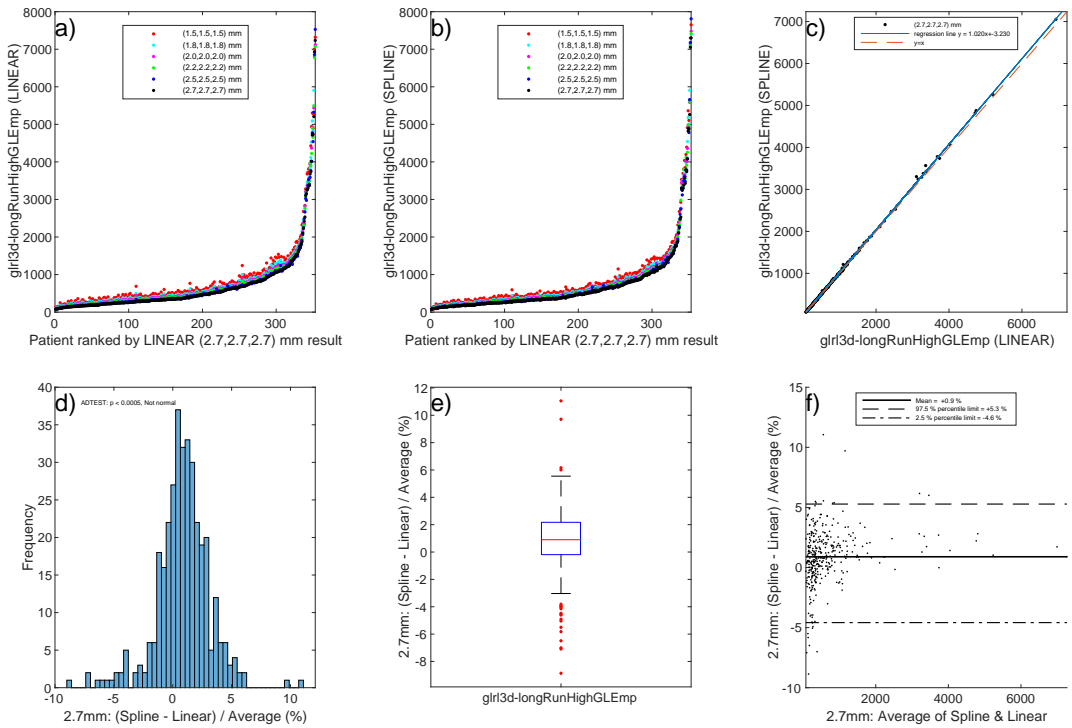

Figure 51: glr13d-longRunHighGLEmp



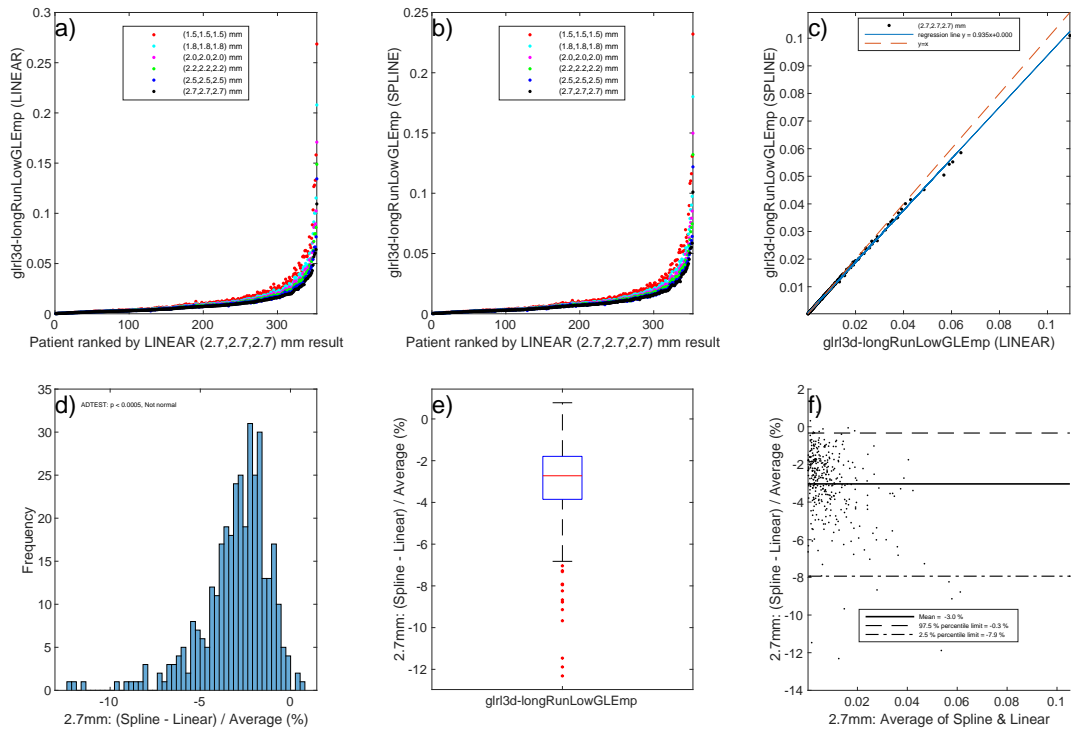

Figure 52: glri3d-longRunLowGLEmp

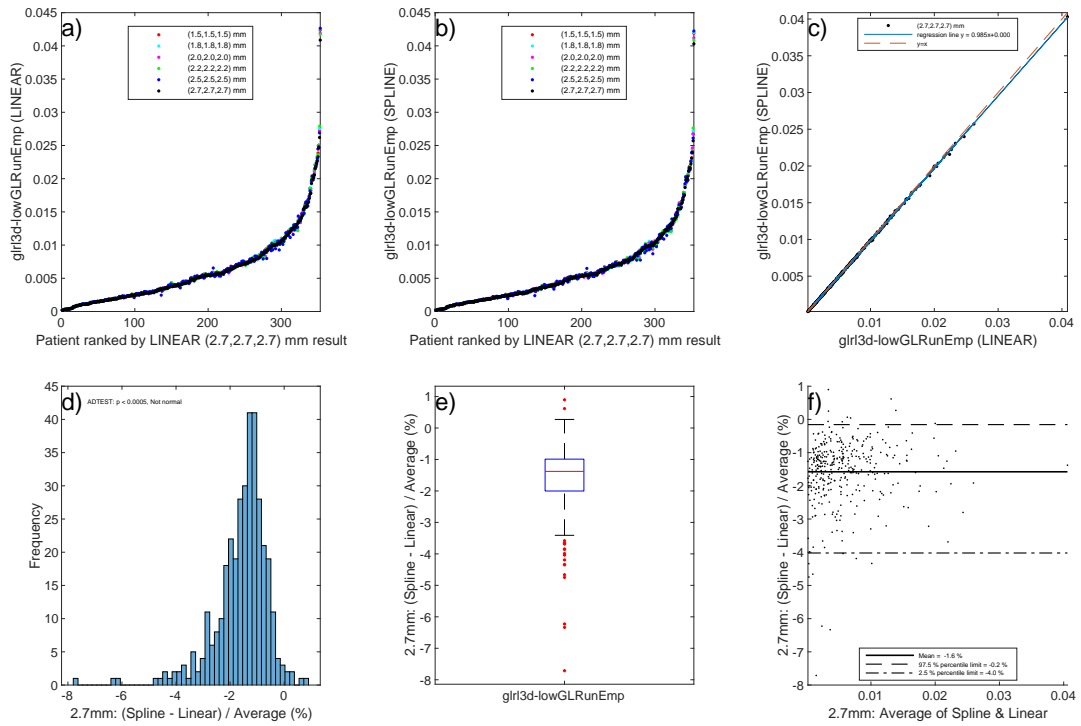

Figure 53: glri3d-lowGLRunEmp

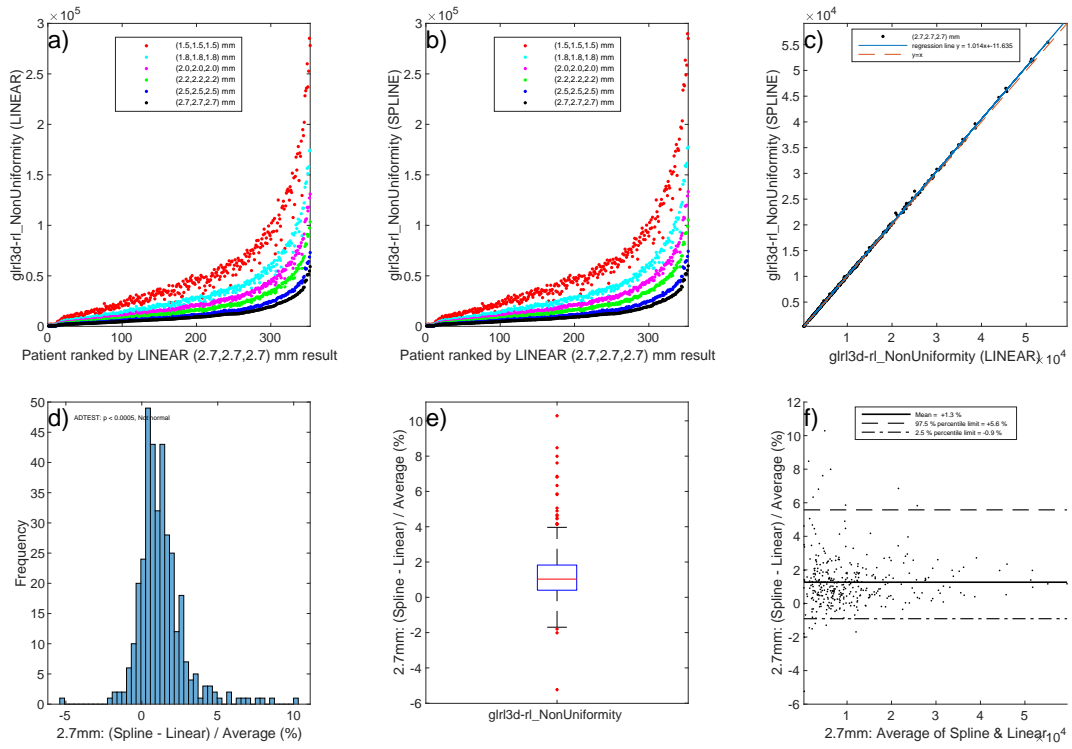

Figure 54: glr13d-rl-NonUniformity

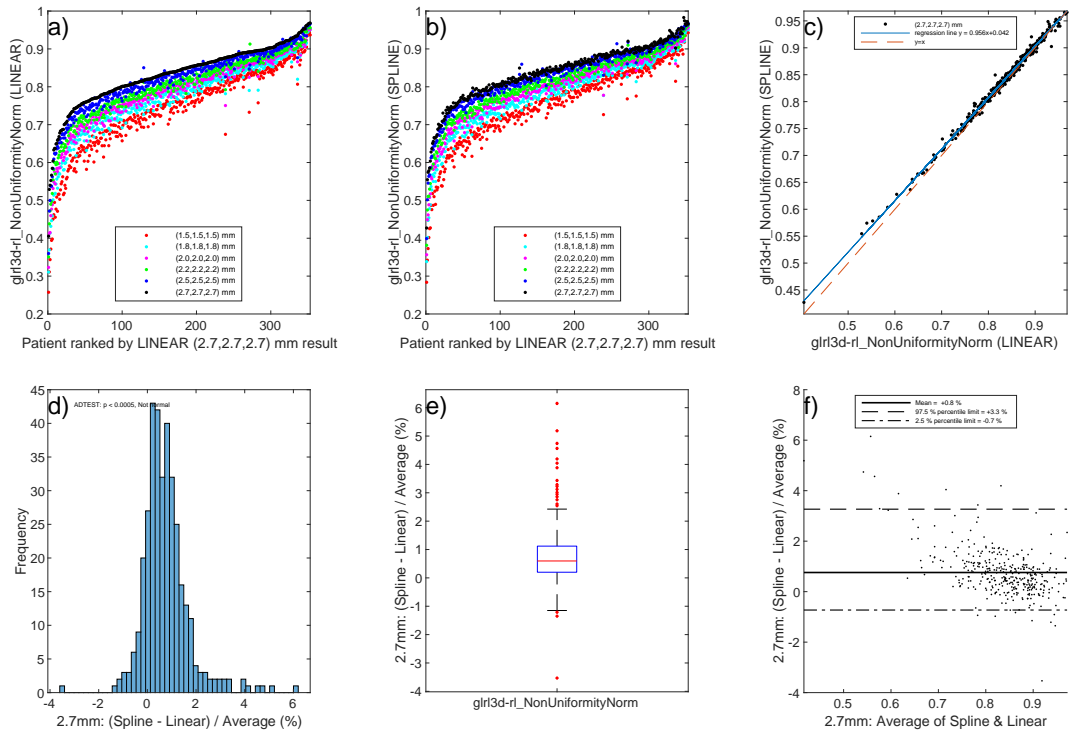

Figure 55: glr13d-rl-NonUniformityNorm

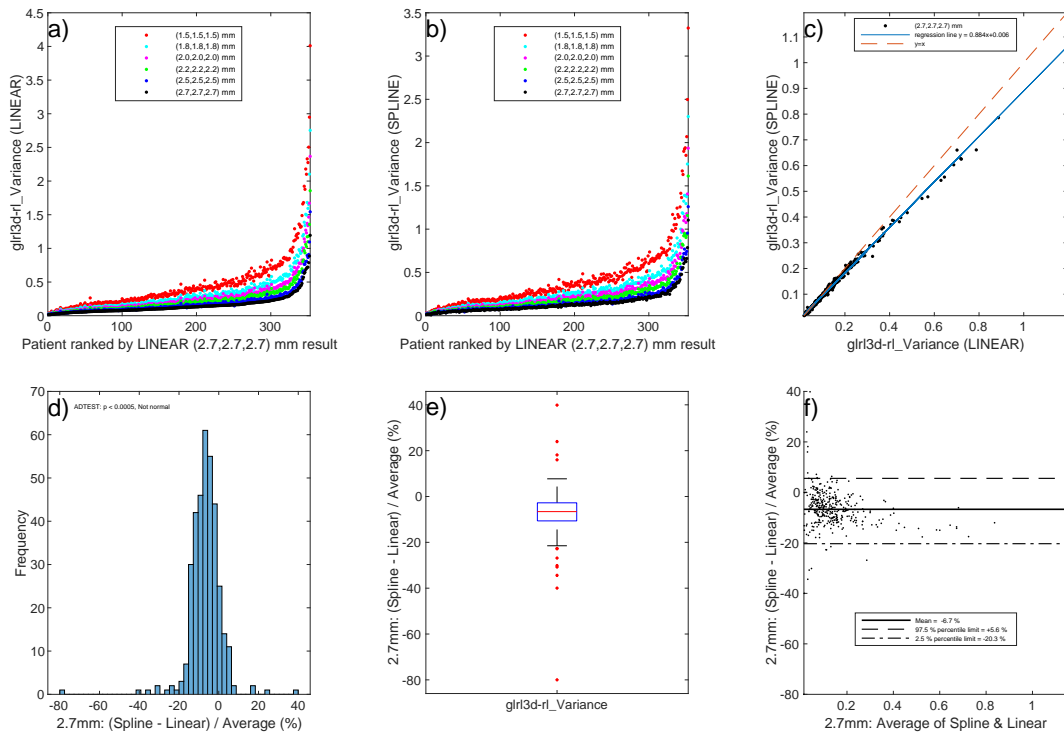

Figure 56:  $glr13d-ri-Variance$

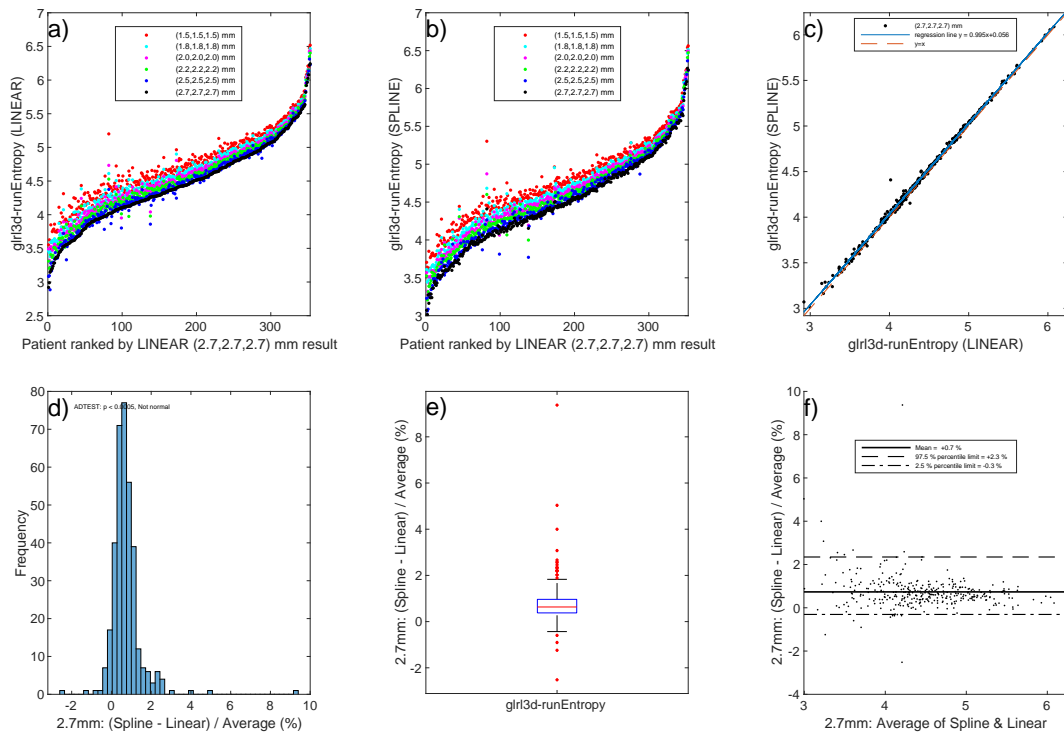

Figure 57:  $glr13d-runEntropy$

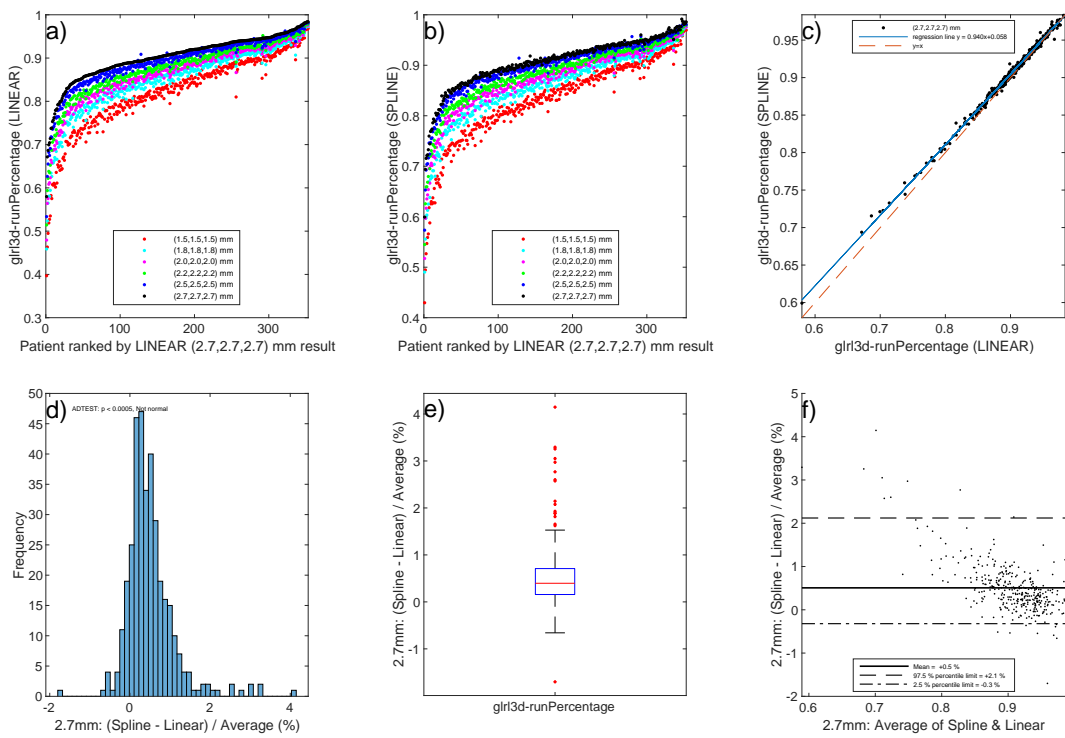

Figure 58: `glrl3d-runPercentage`

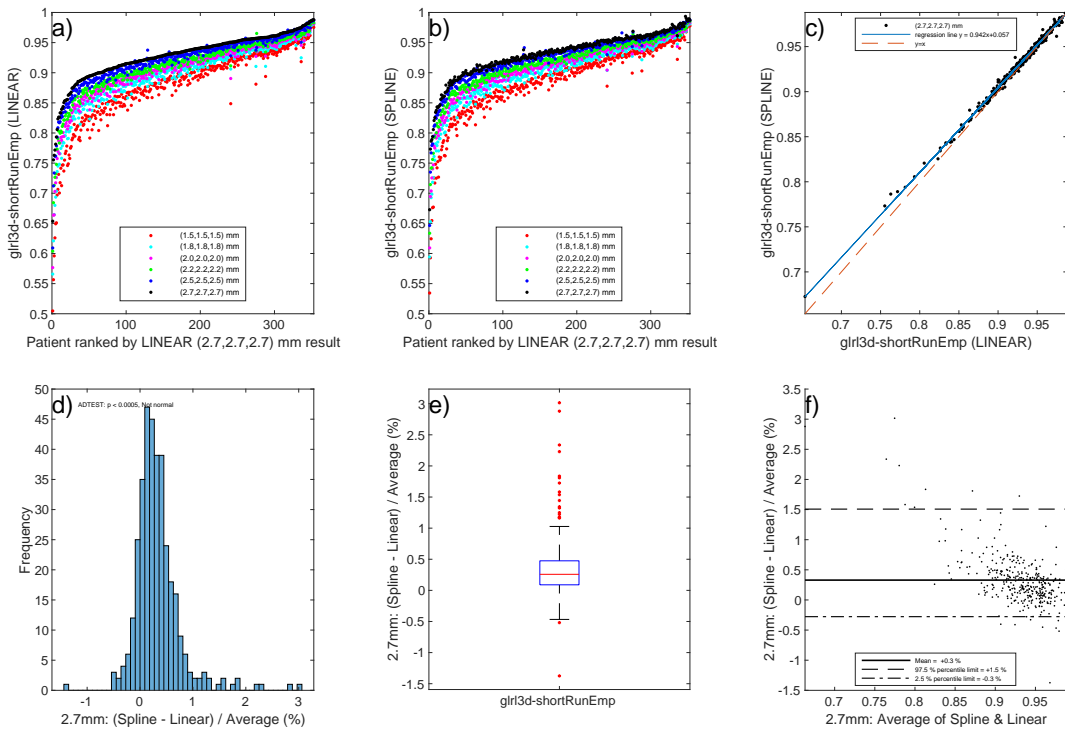

Figure 59: `glrl3d-shortRunEmp`

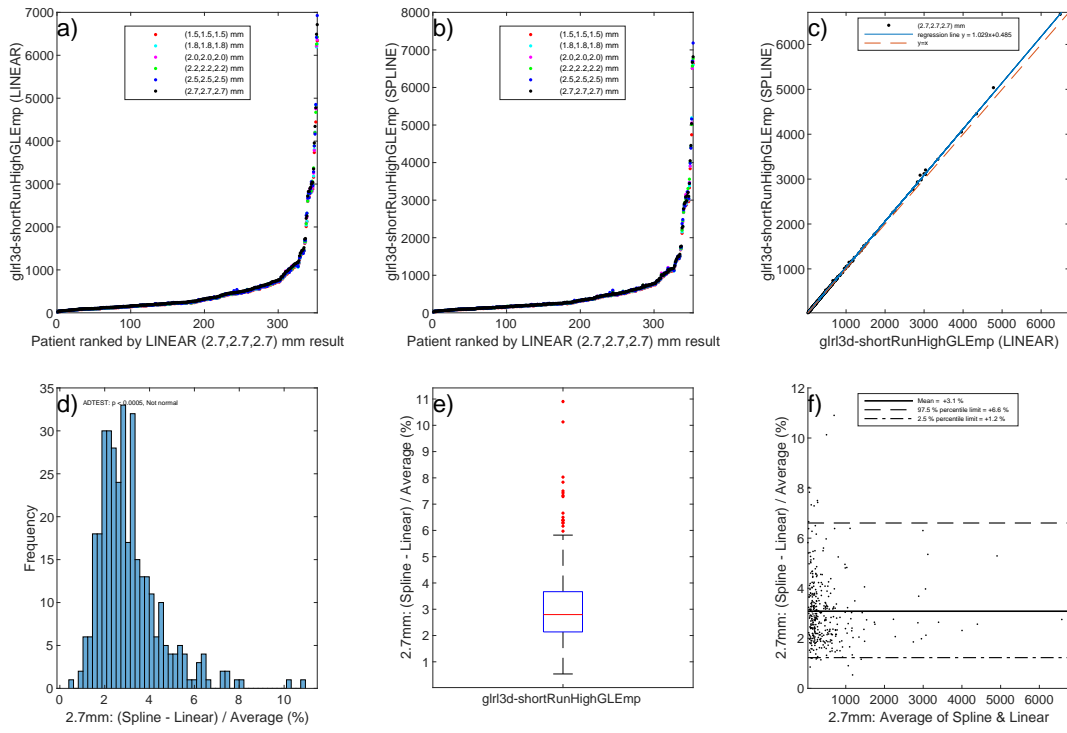

Figure 60: glri3d-shortRunHighGLEmp

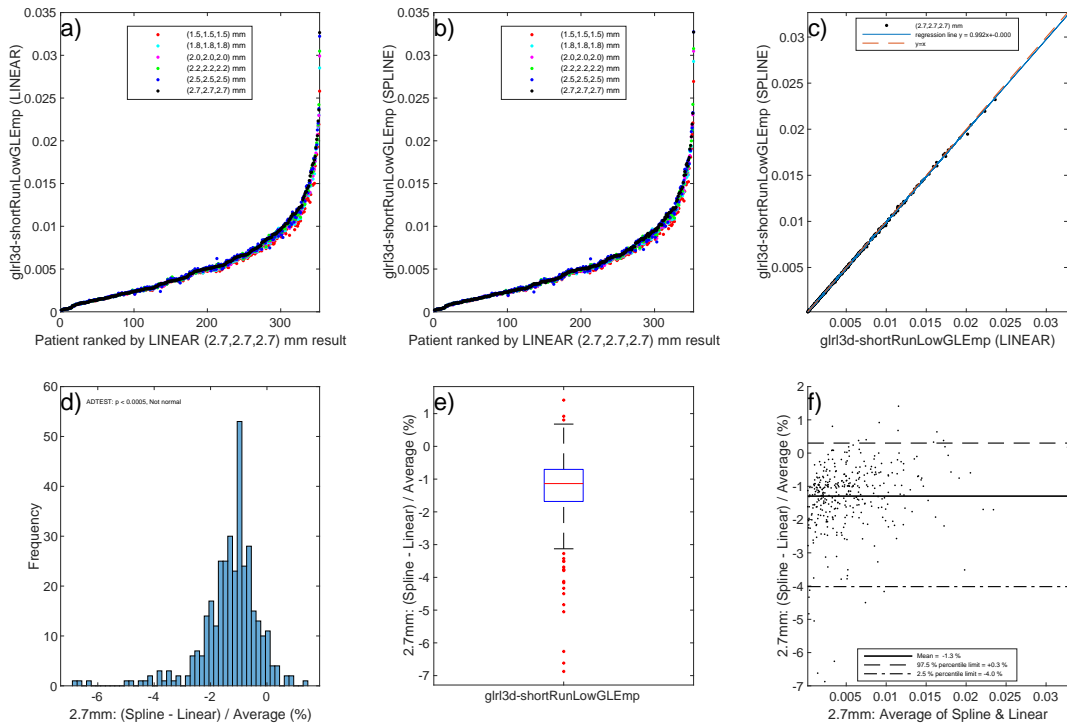

Figure 61: glri3d-shortRunLowGLEmp

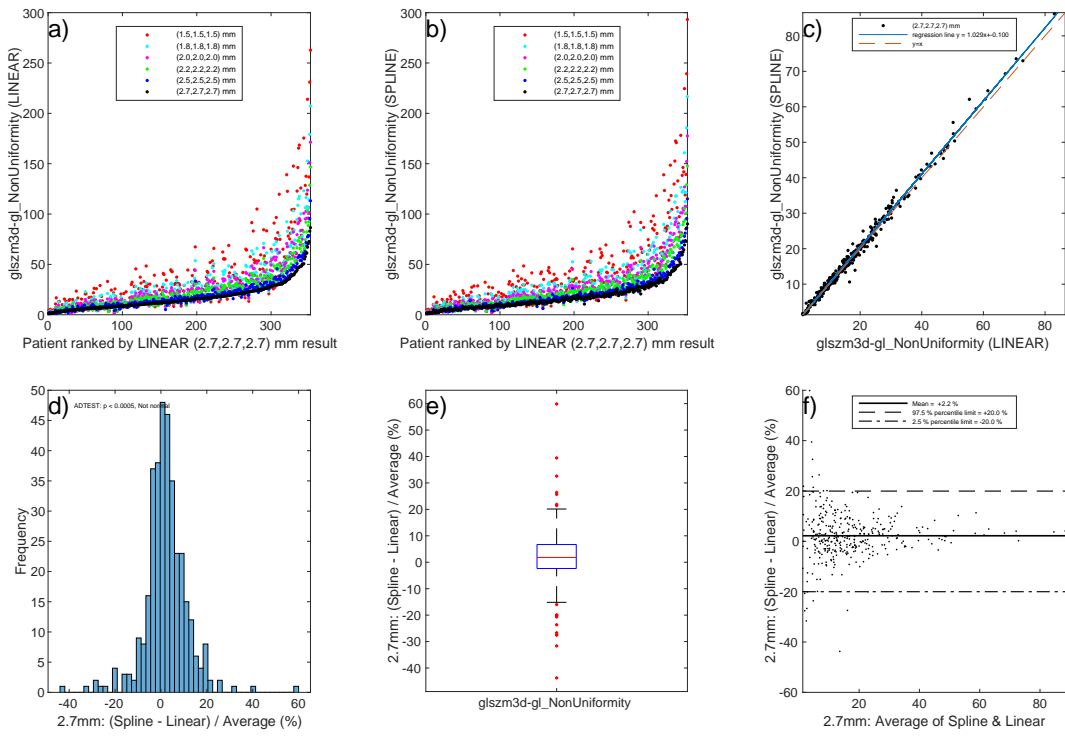

Figure 62: glszm3d-gl-NonUniformity

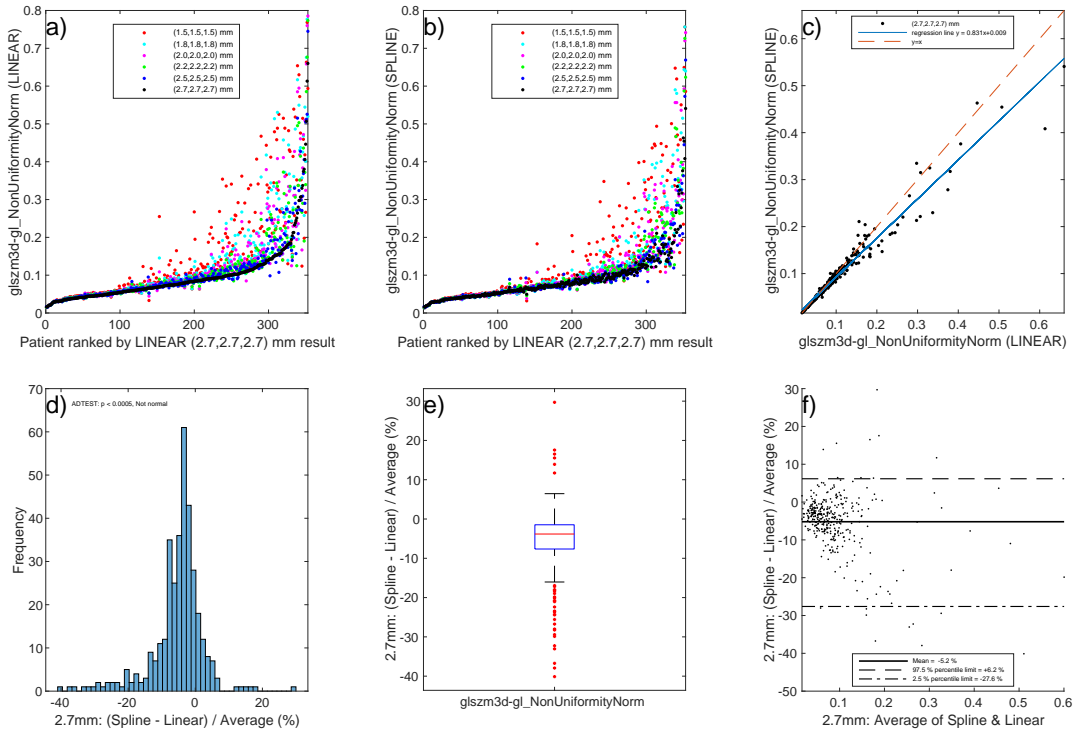

Figure 63: glszm3d-gl-NonUniformityNorm

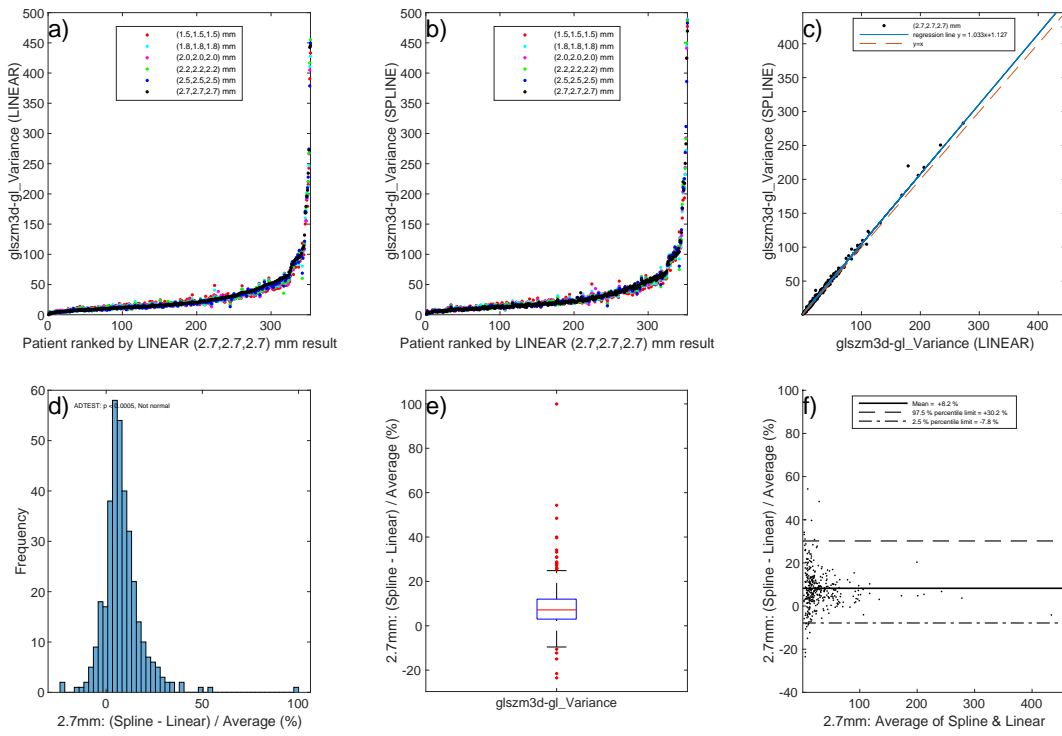

Figure 64: glszm3d-gl-Variance

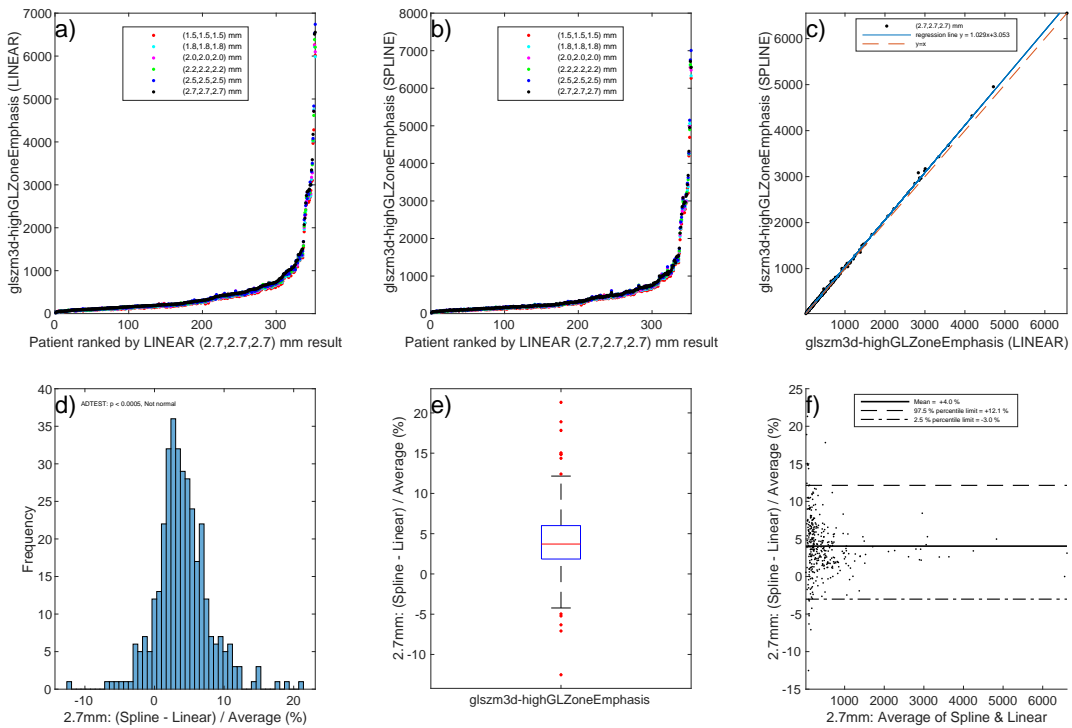

Figure 65: glszm3d-highGLZoneEmphasis

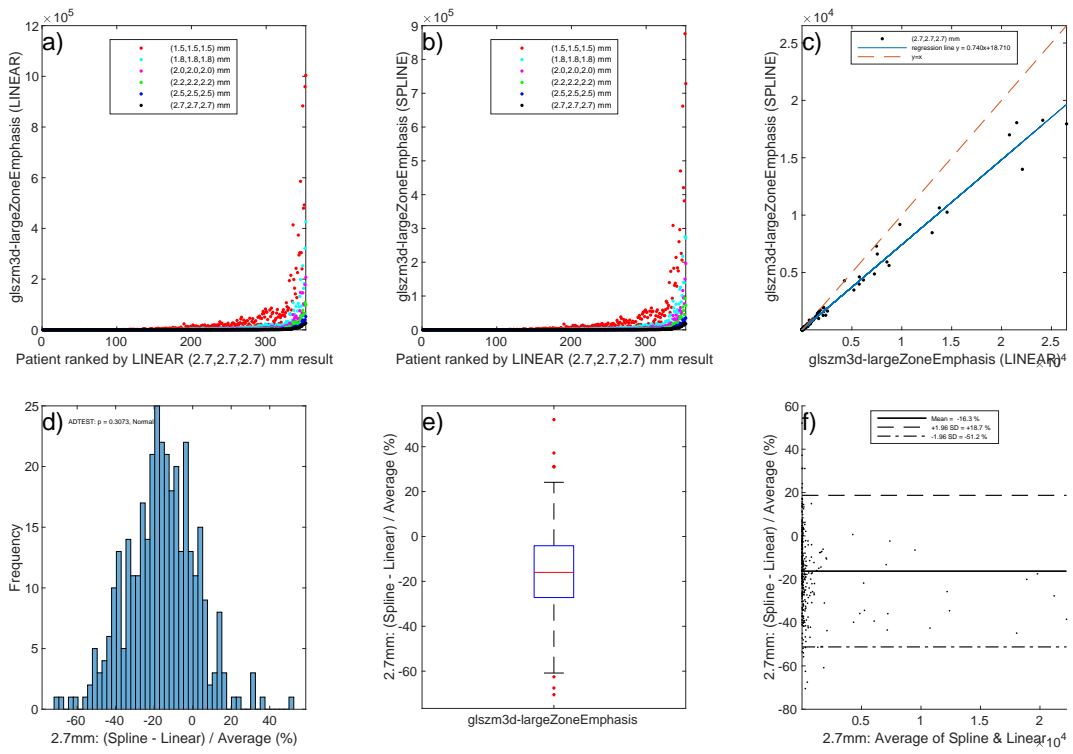

Figure 66: glszm3d-largeZoneEmphasis

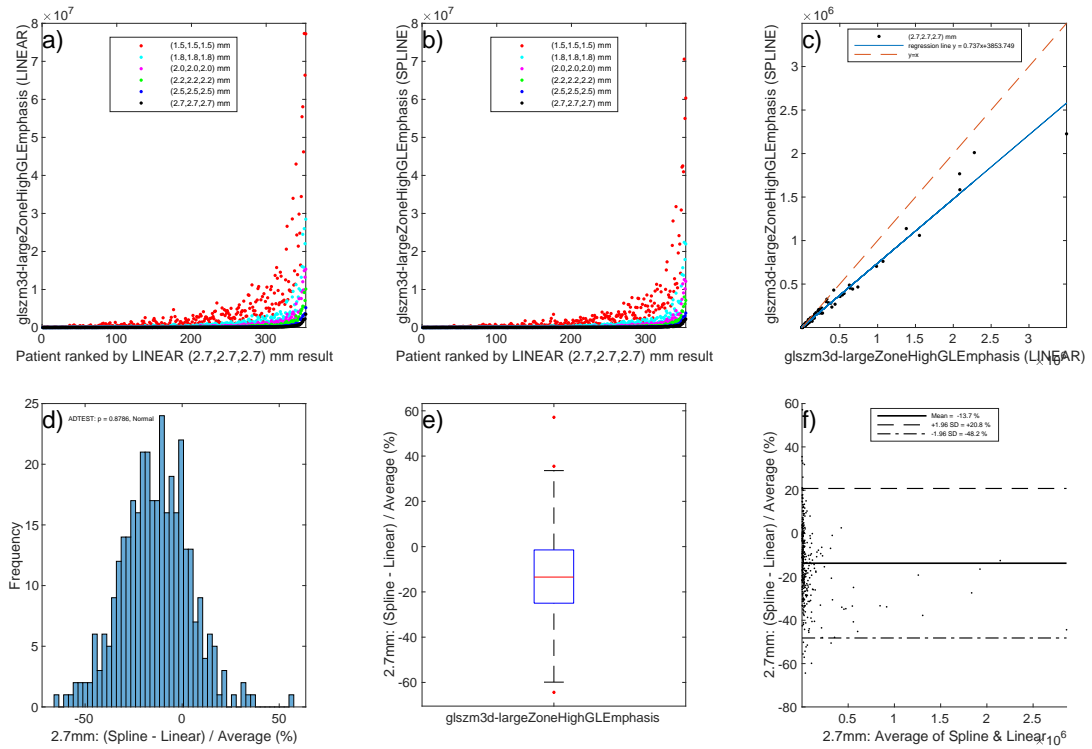

Figure 67: glszm3d-largeZoneHighGLEmphasis



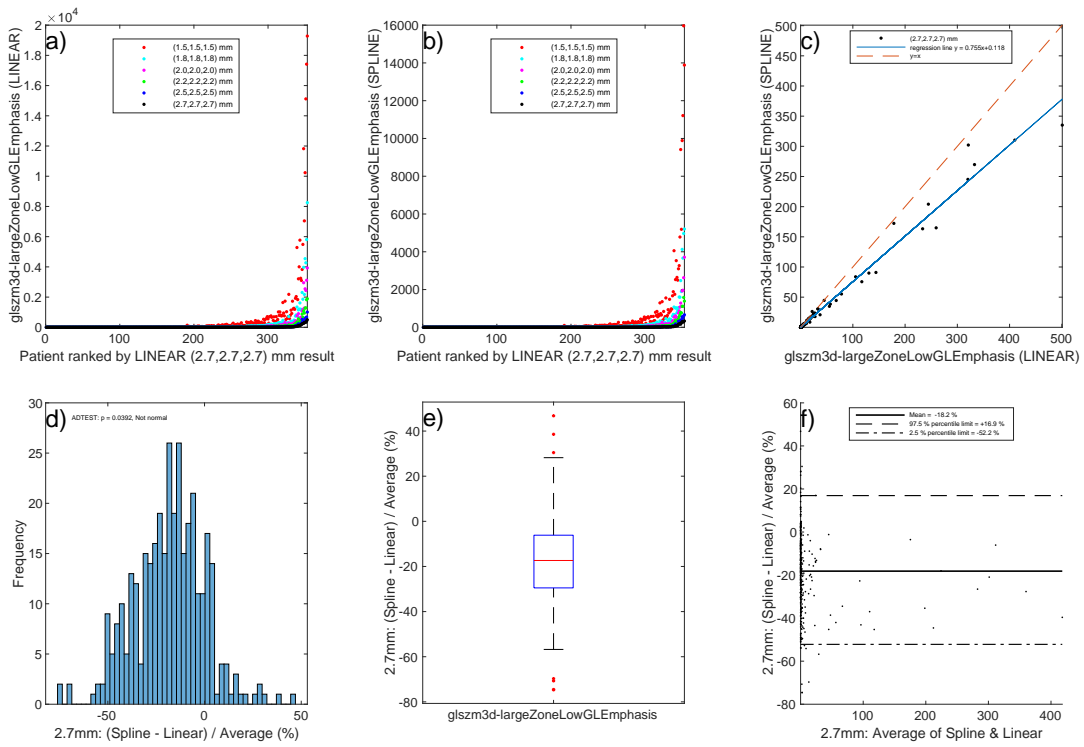

Figure 68: glszm3d-largeZoneLowGLEmphasis

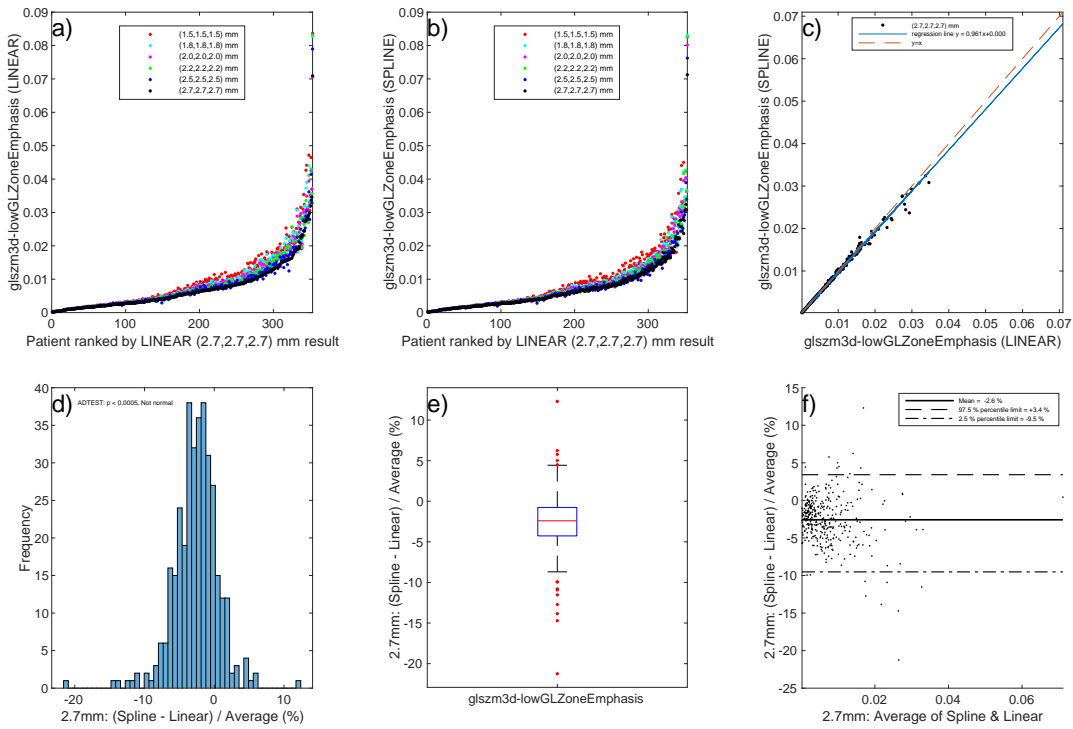

Figure 69: glszm3d-lowGLZoneEmphasis

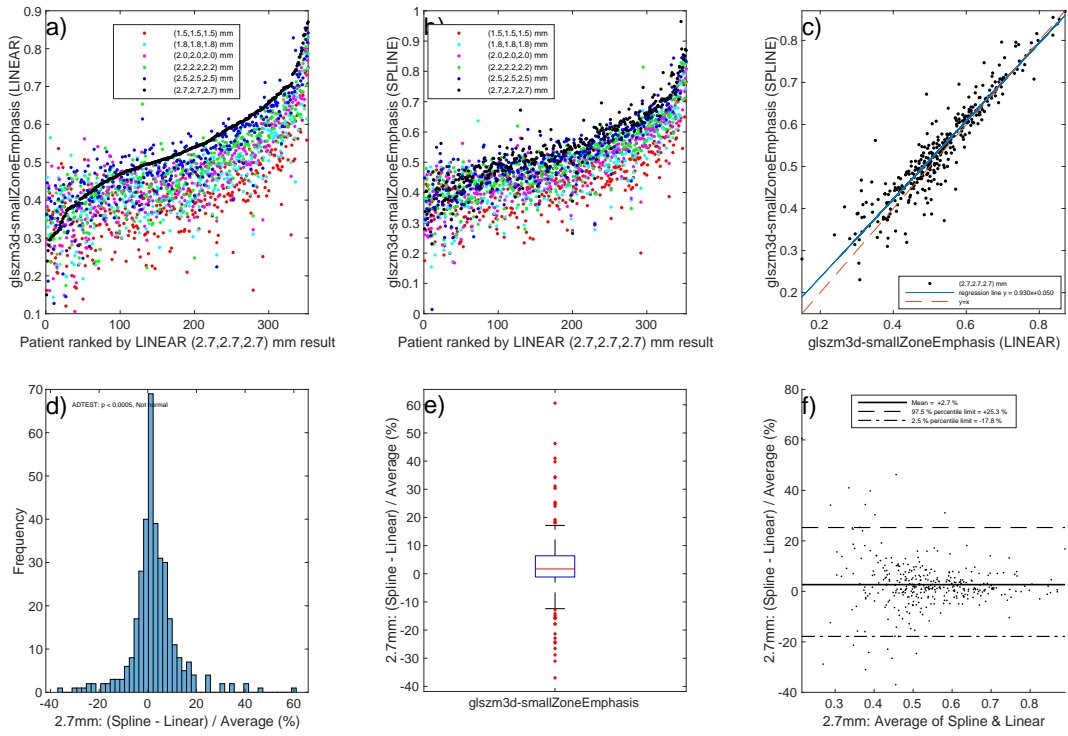

Figure 70: glszm3d-smallZoneEmphasis

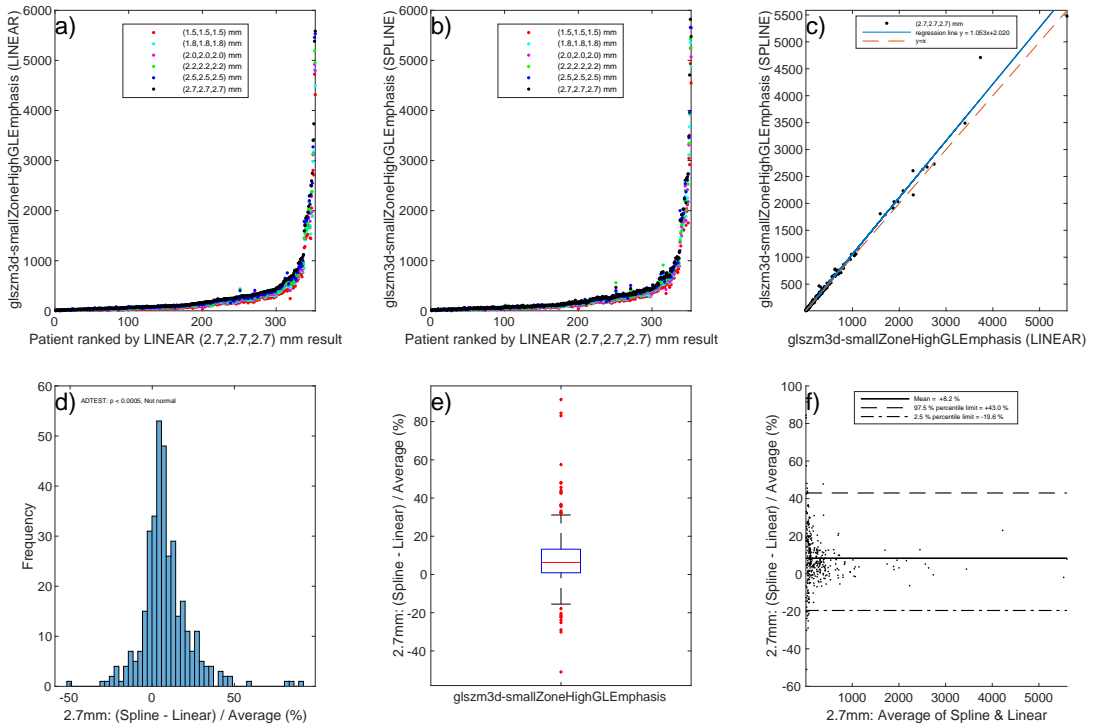

Figure 71: glszm3d-smallZoneHighGLEmphasis

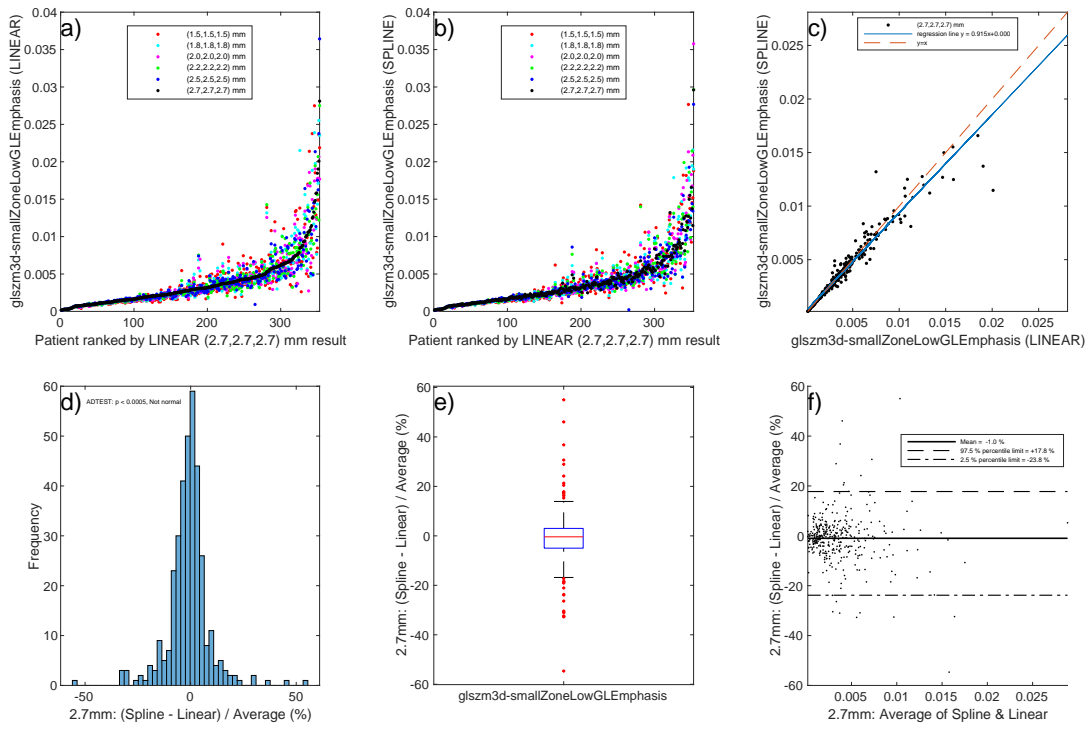

Figure 72: glsm3d-smallZoneLowGLEmphasis

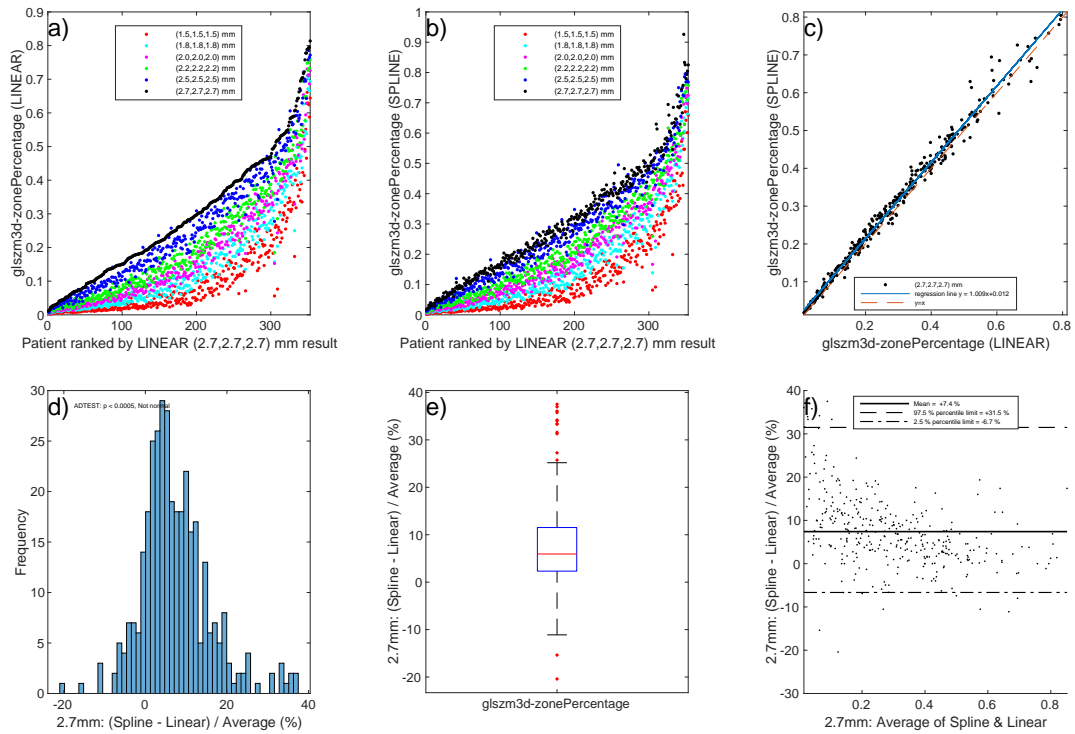

Figure 73: glsm3d-zonePercentage

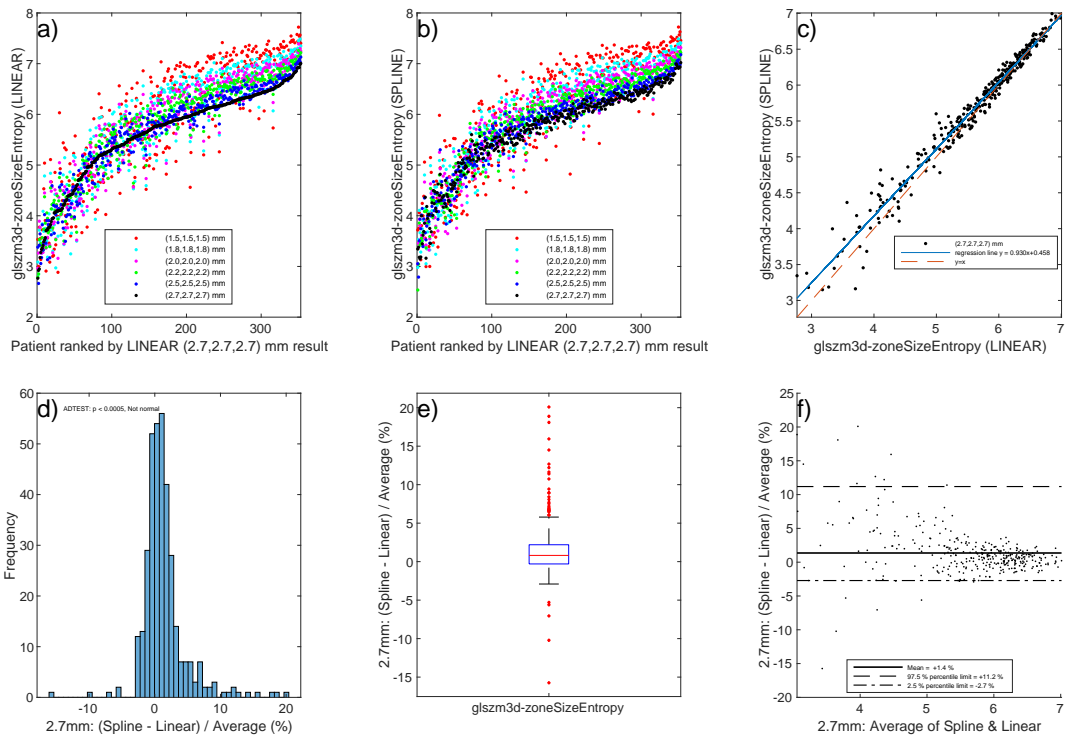

Figure 74: glszm3d-zoneSizeEntropy

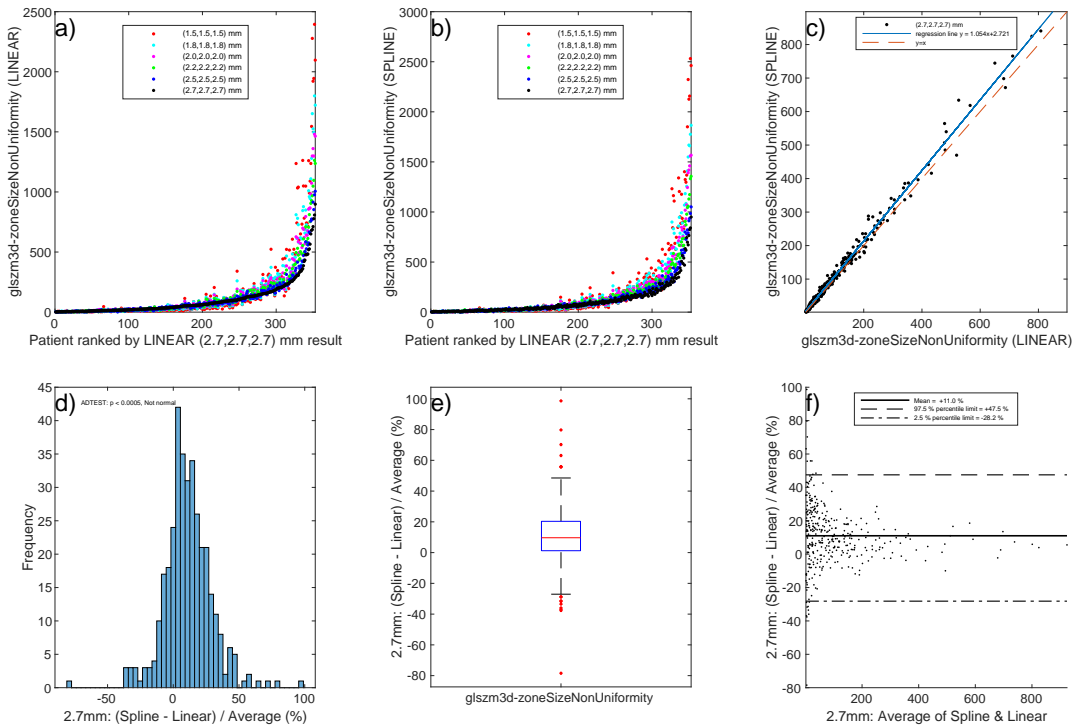

Figure 75: glszm3d-zoneSizeNonUniformity

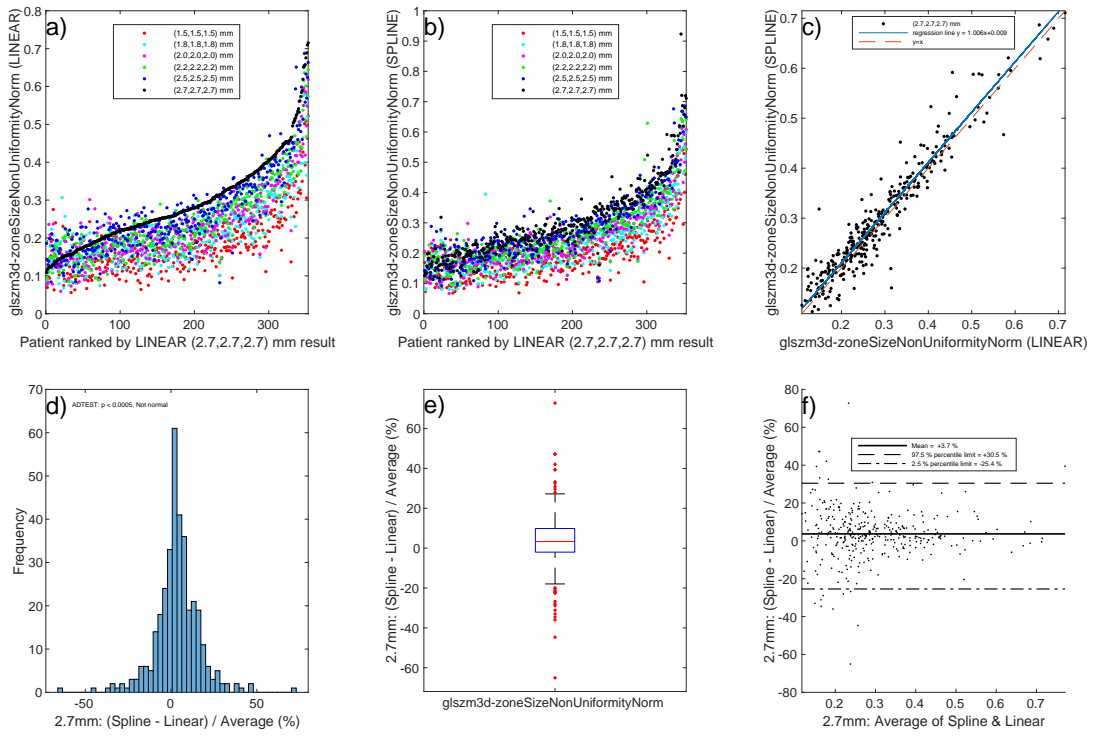

Figure 76: glszm3d-zoneSizeNonUniformityNorm

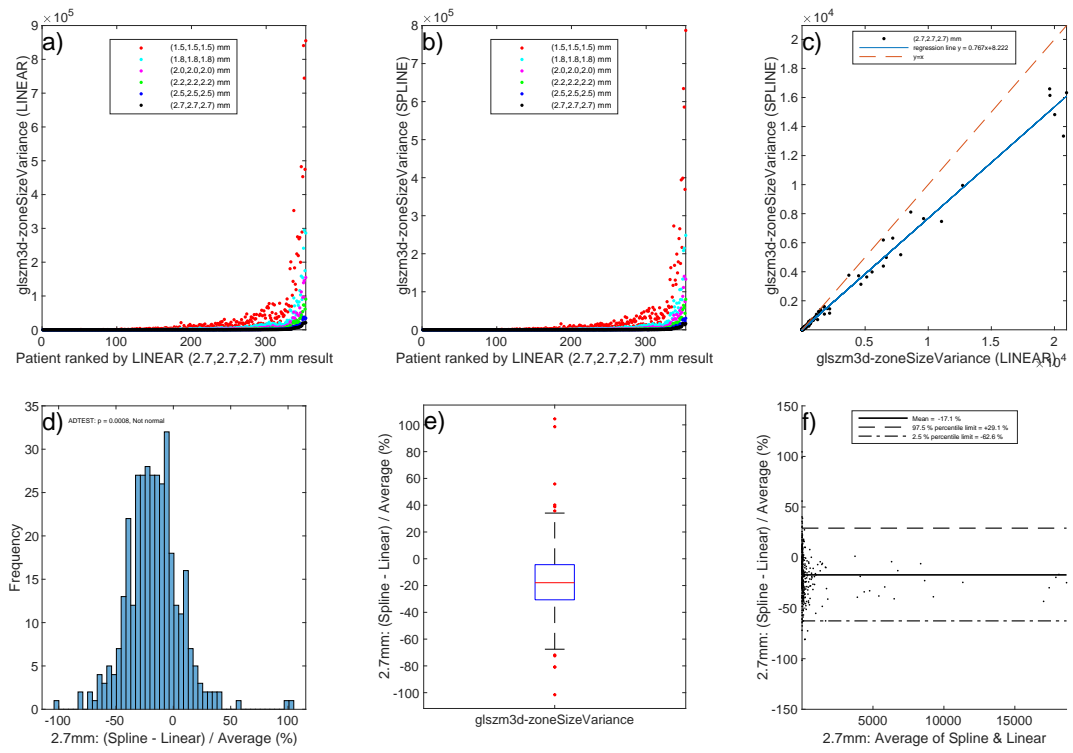

Figure 77: glszm3d-zoneSizeVariance

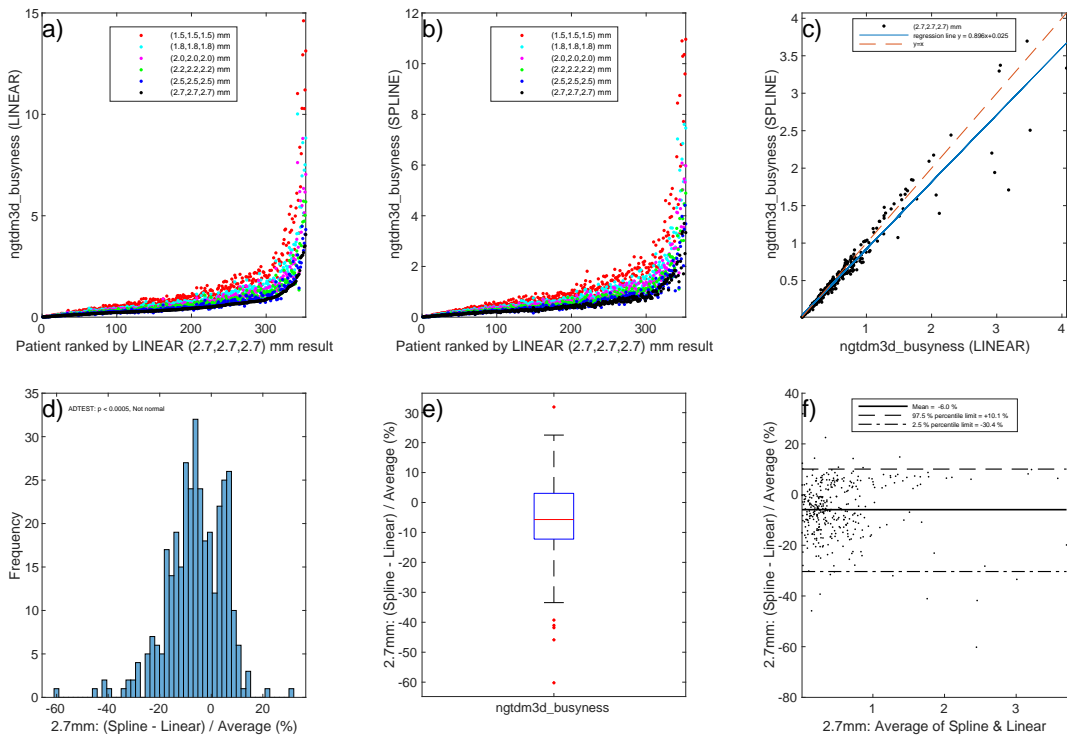

Figure 78: ngtdm3d-busyness

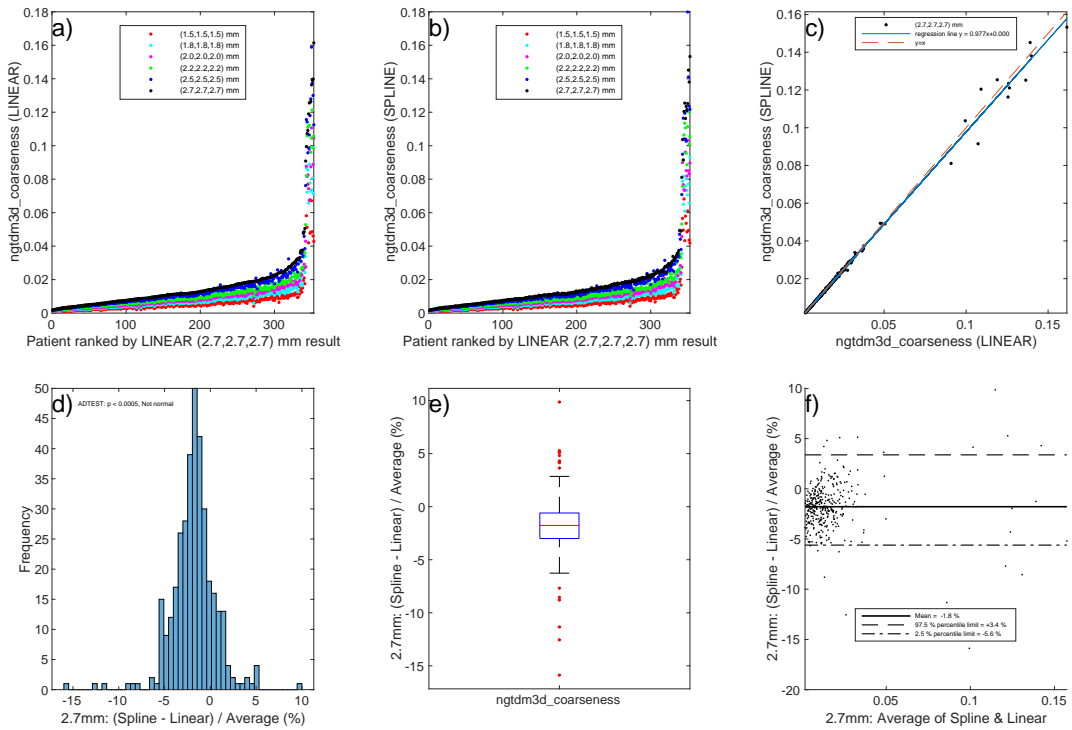

Figure 79: ngtdm3d-coarseness

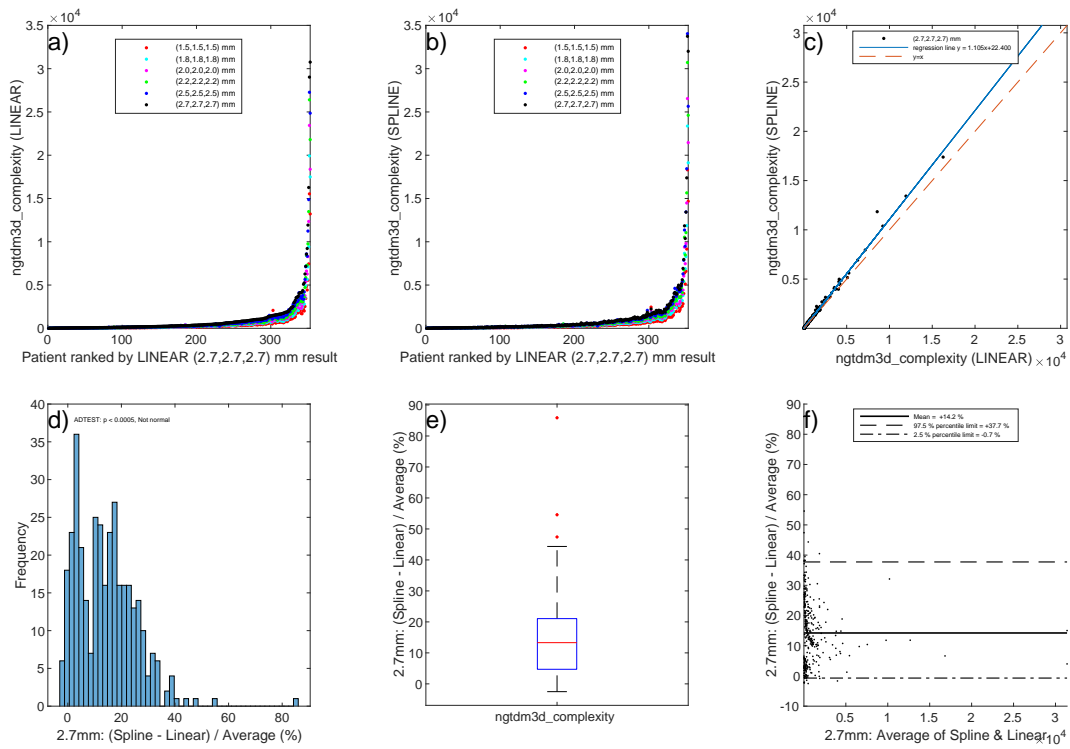

Figure 80: ngtdm3d-complexity

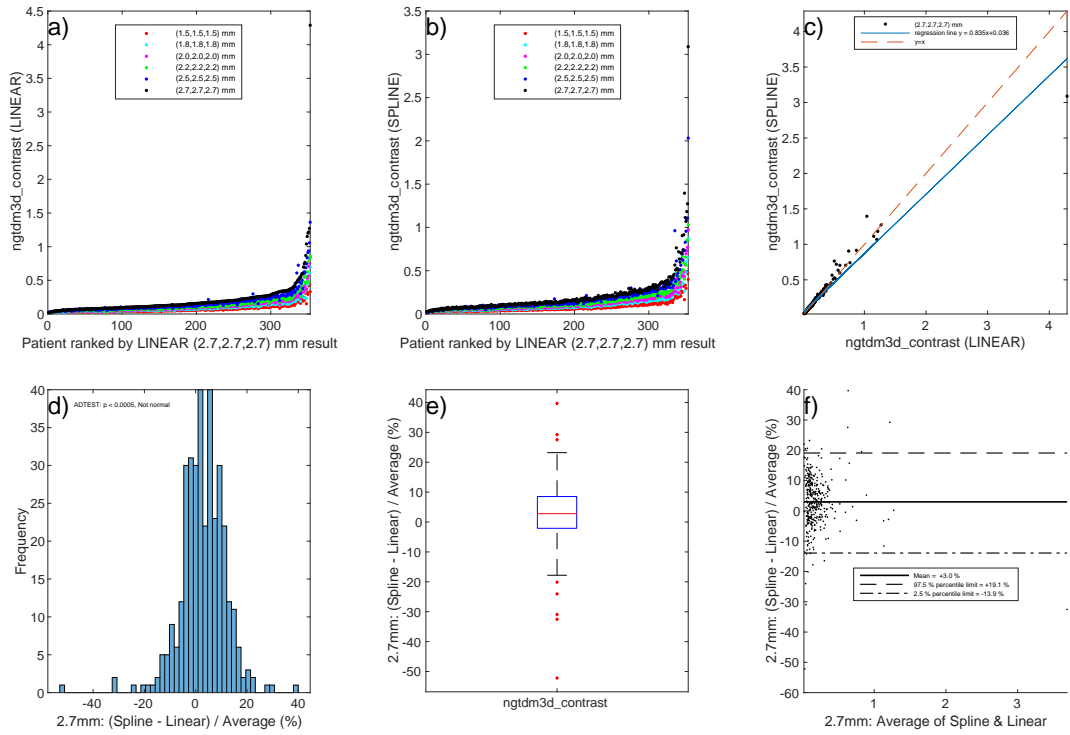

Figure 81: ngtdm3d-contrast

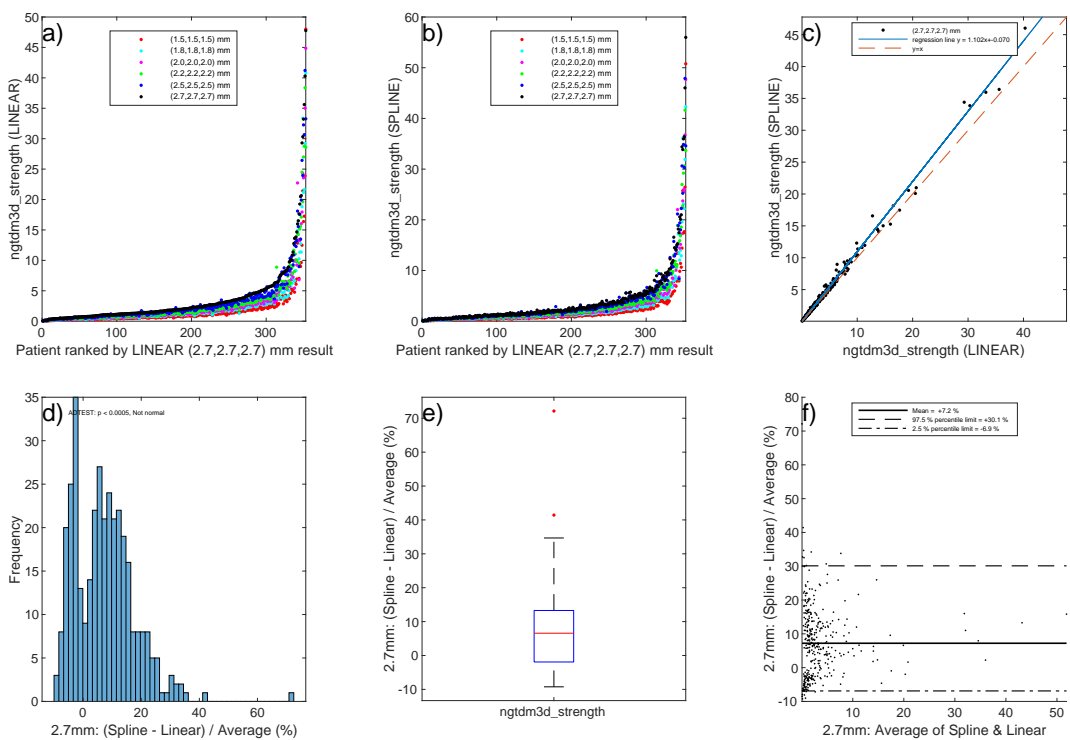

Figure 82: ngtdm3d-strength



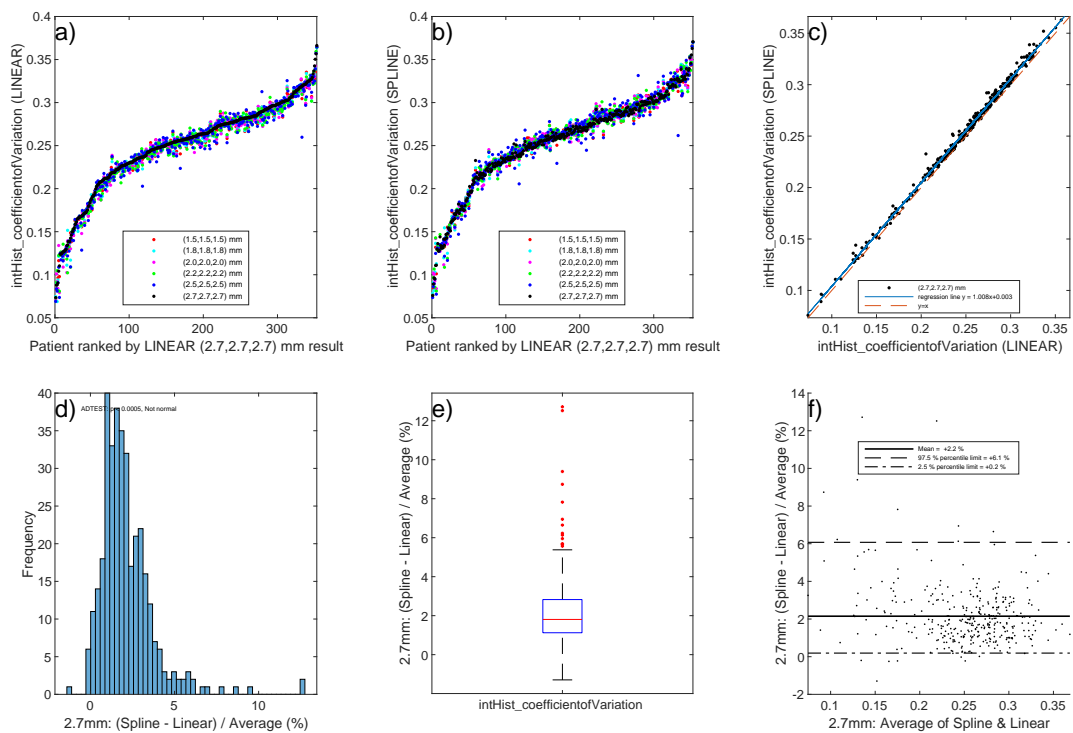

Figure 83: intHist-coefficientofVariation

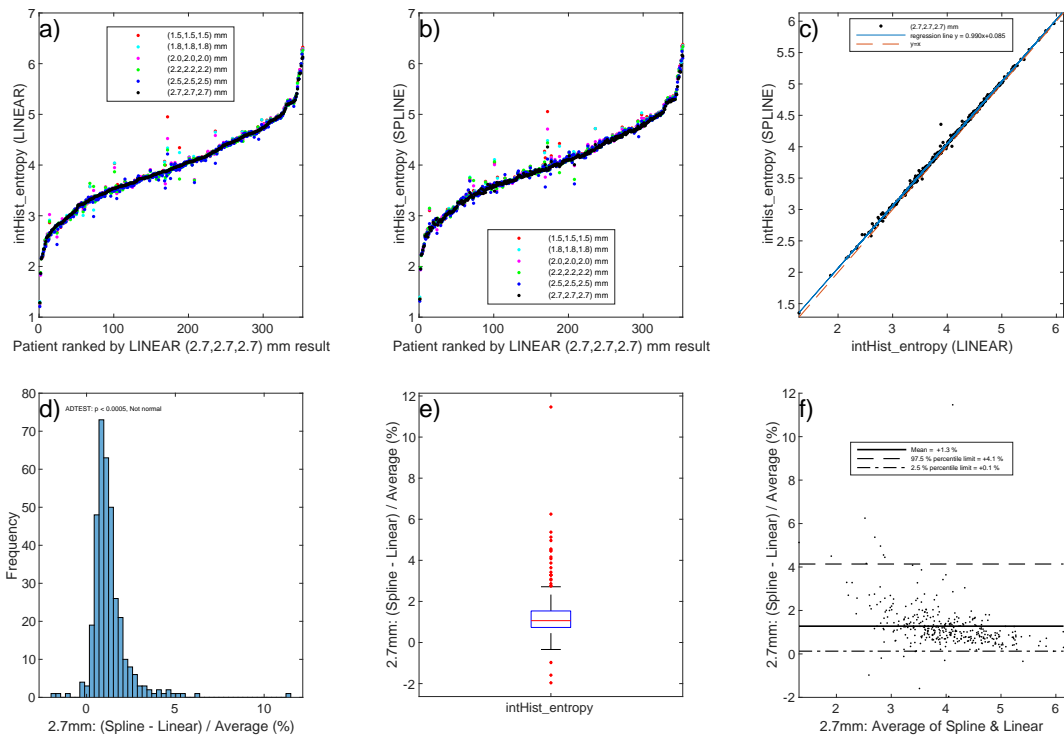

Figure 84: intHist-entropy

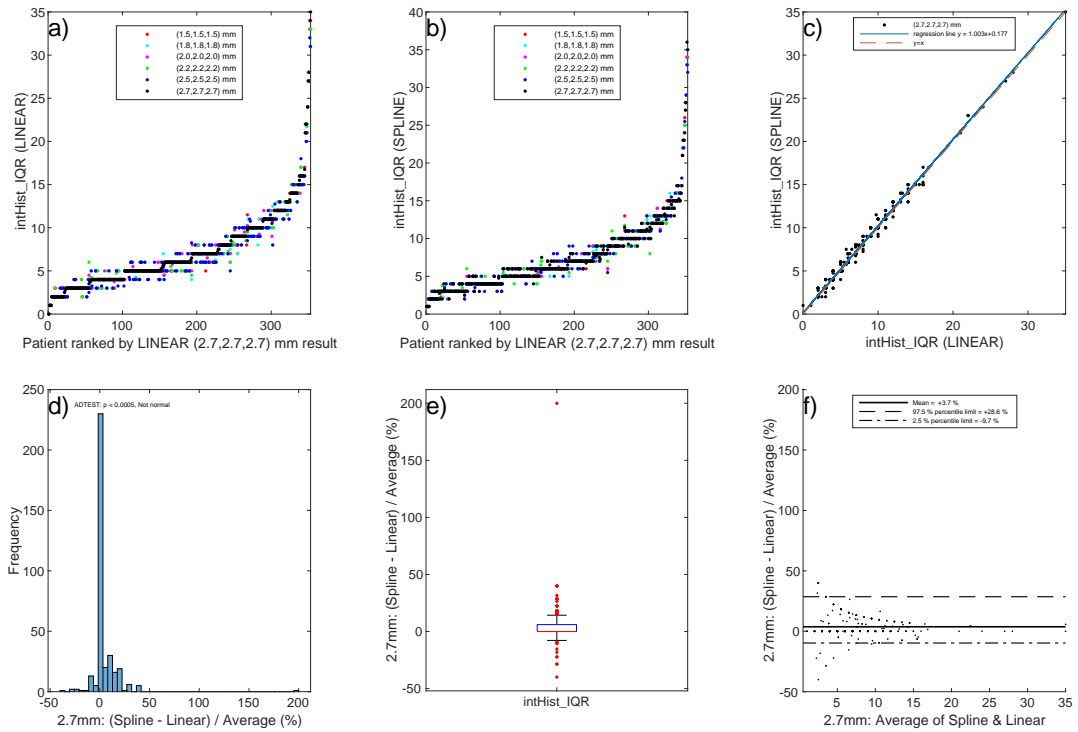

Figure 85: intHist-IQR

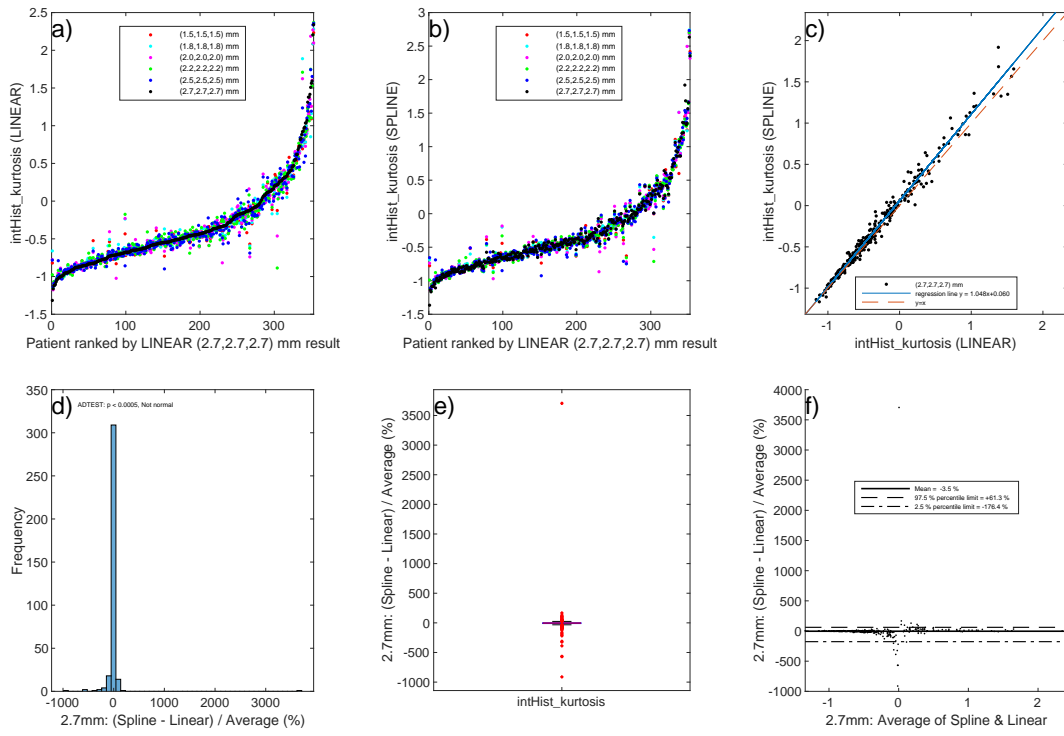

Figure 86: intHist-kurtosis

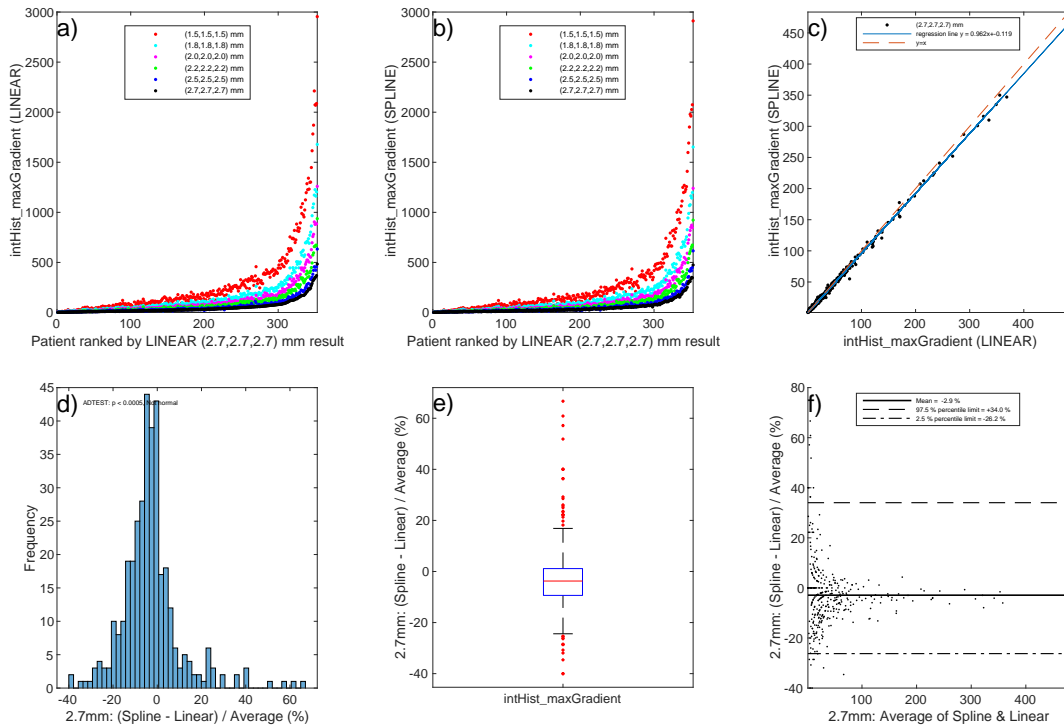

Figure 87: intHist-maxGradient

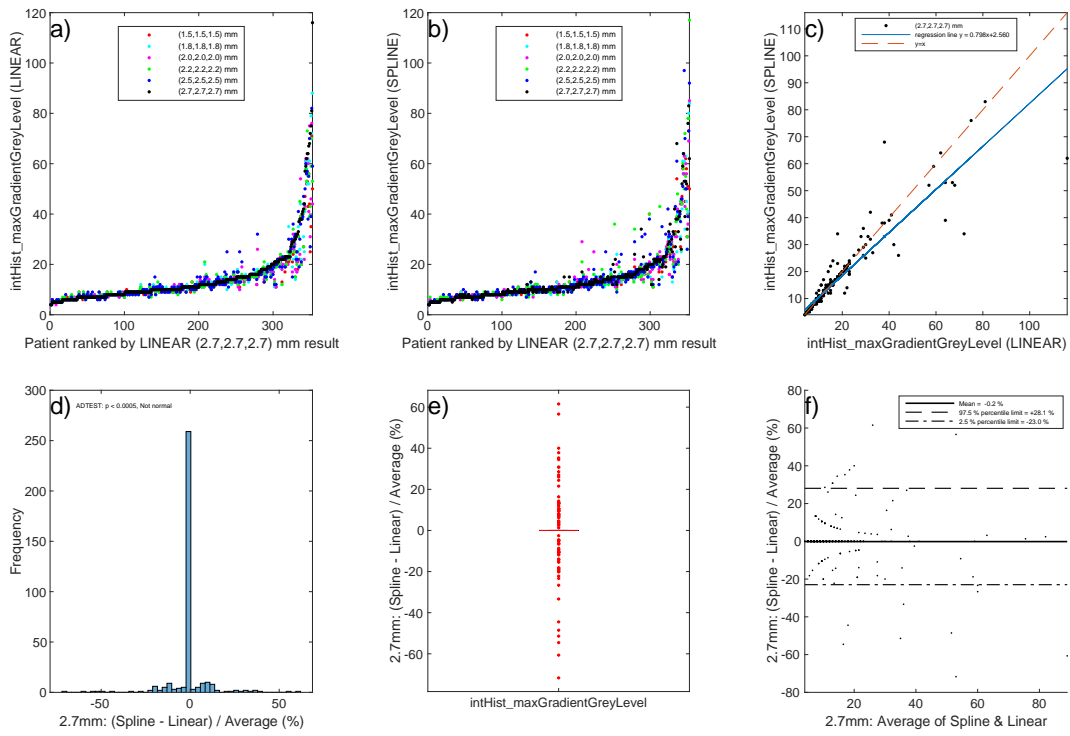

Figure 88: intHist-maxGradientGreyLevel

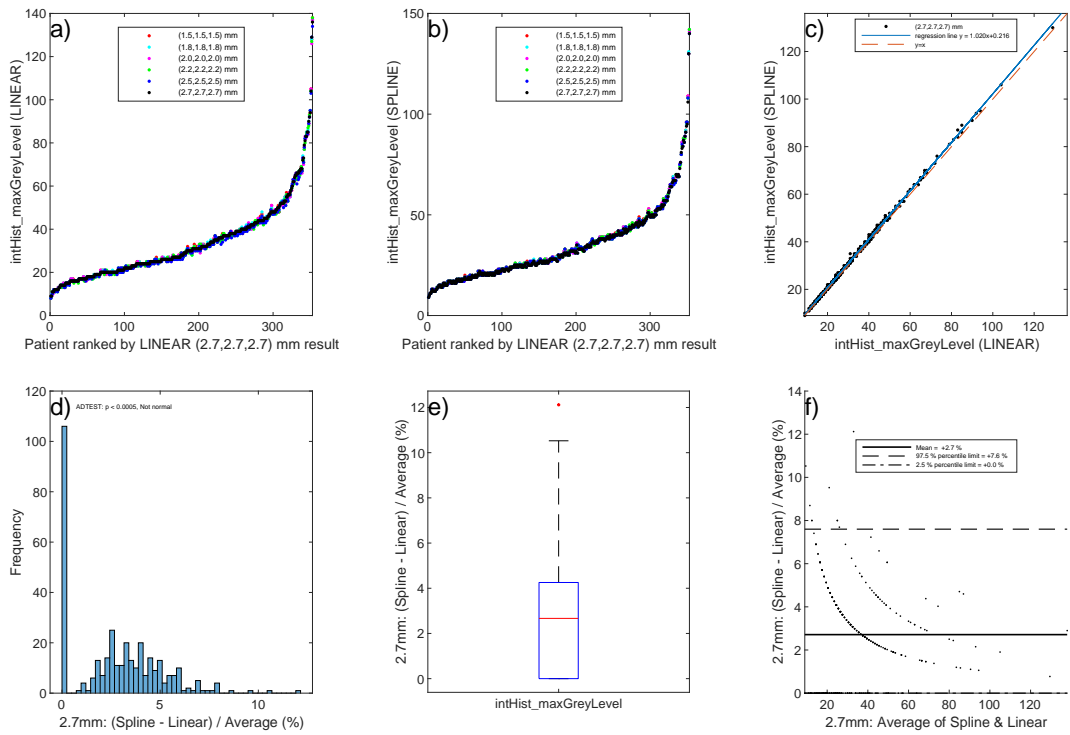

Figure 89: intHist-maxGreyLevel

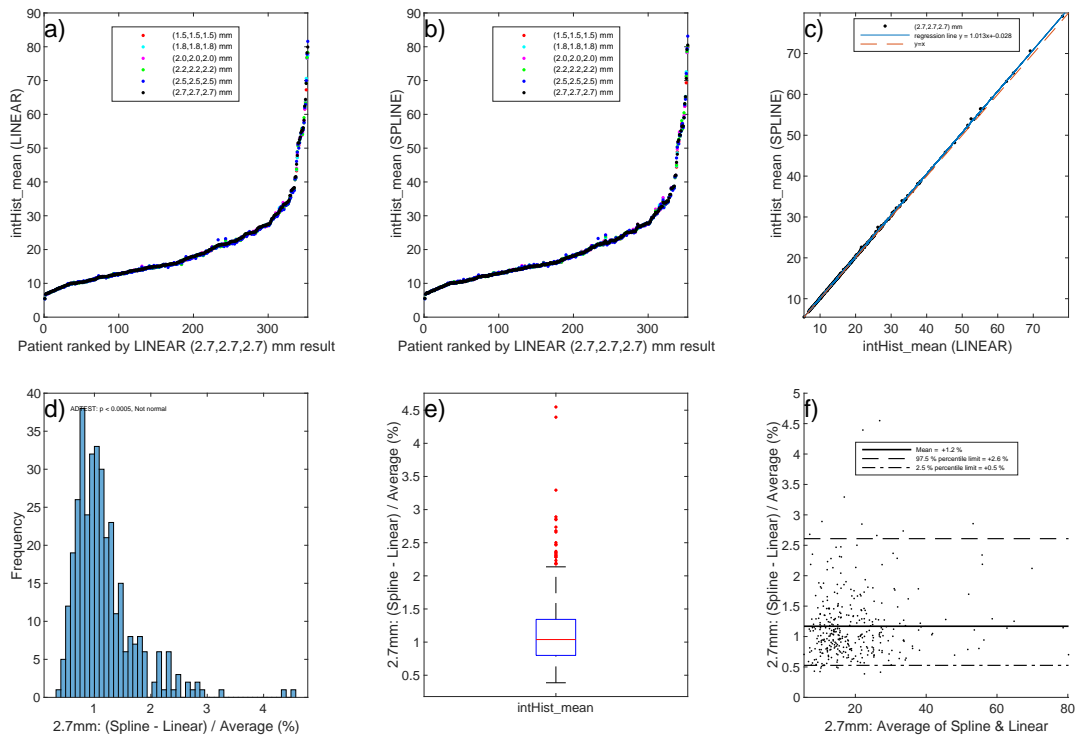

Figure 90: intHist-mean

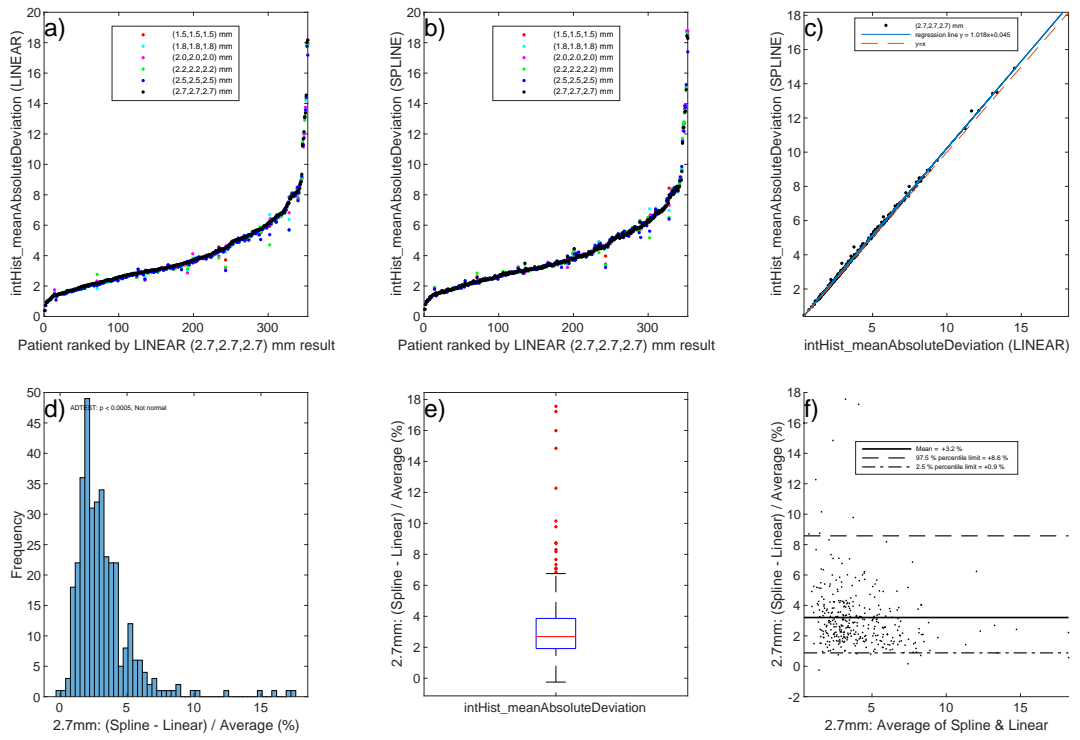

Figure 91: intHist-meanAbsoluteDeviation

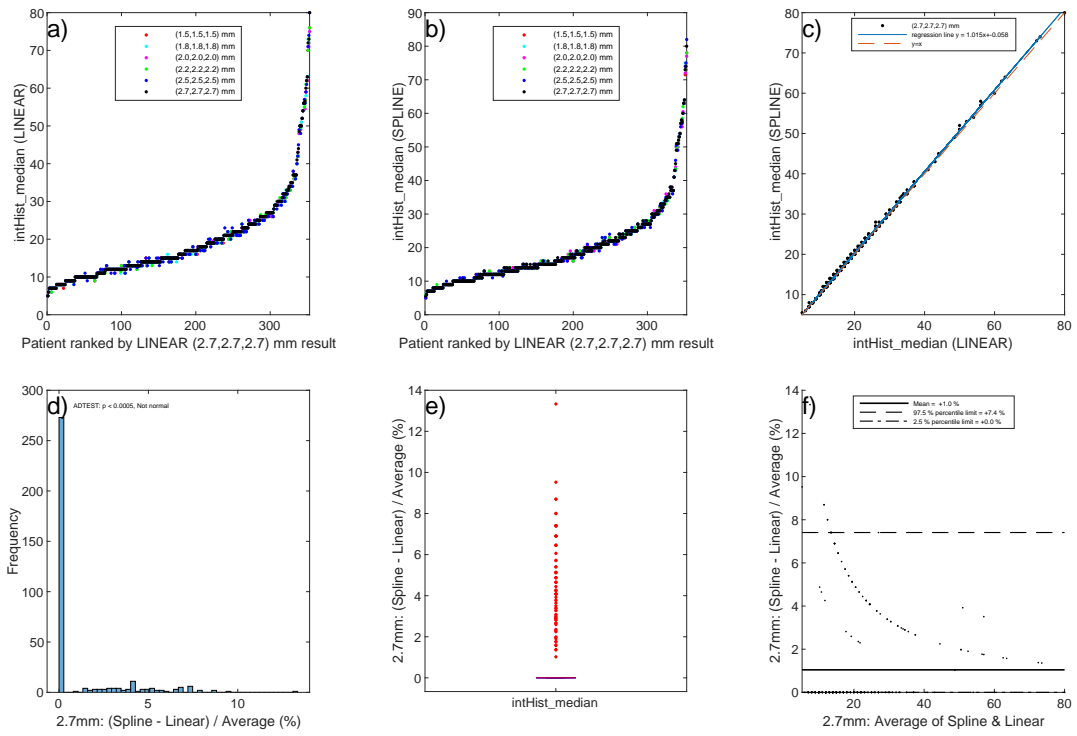

Figure 92: intHist-median

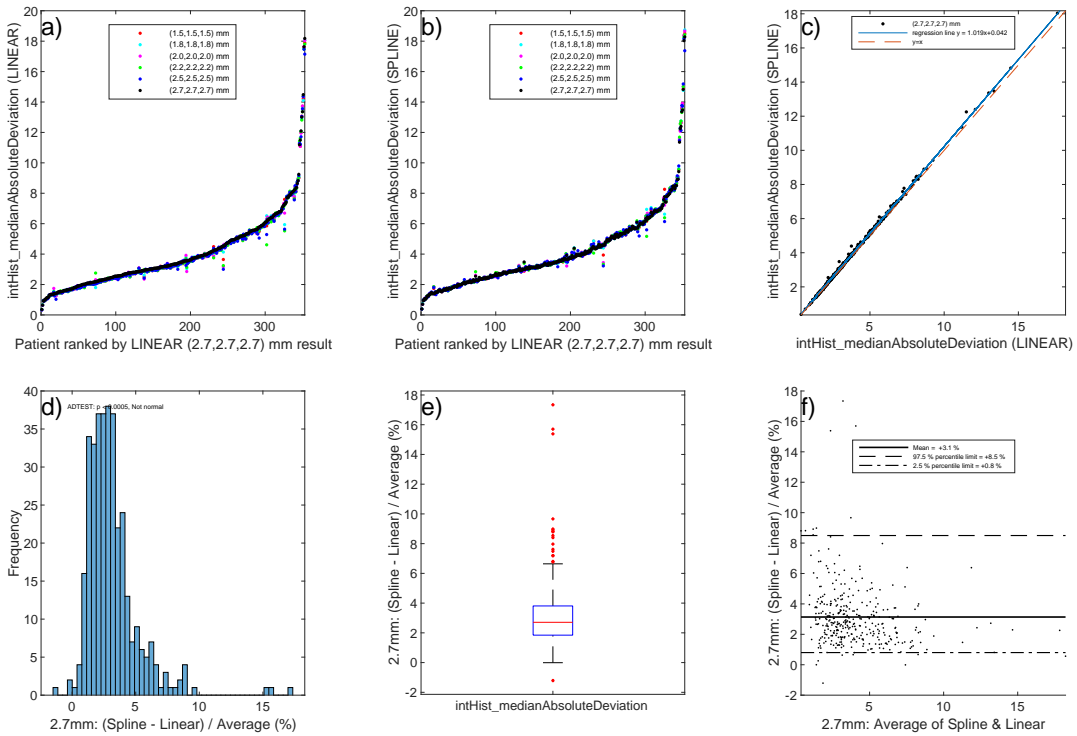

Figure 93: intHist-medianAbsoluteDeviation

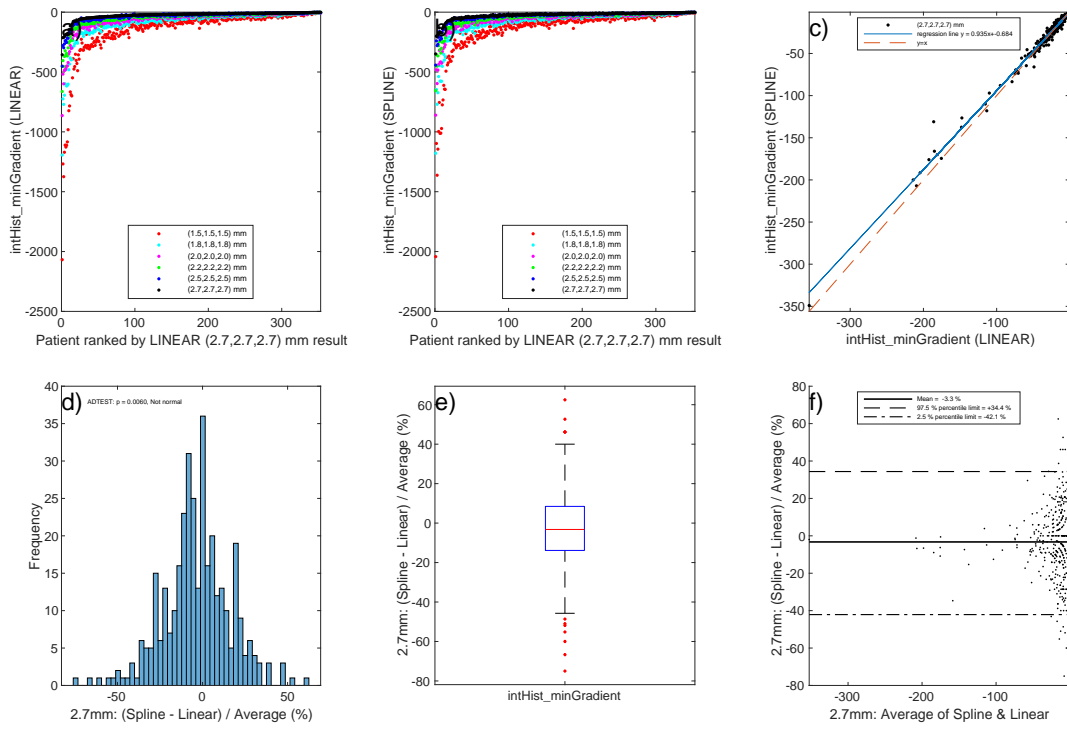

Figure 94: intHist-minGradient

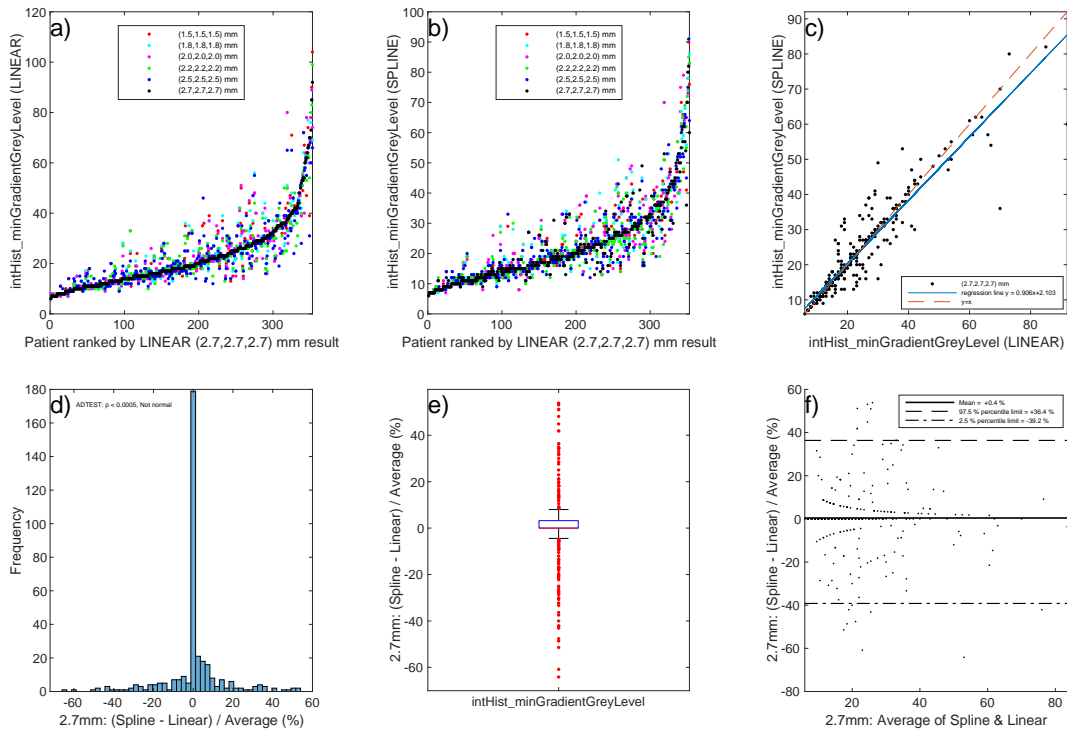

Figure 95: intHist-minGradientGreyLevel

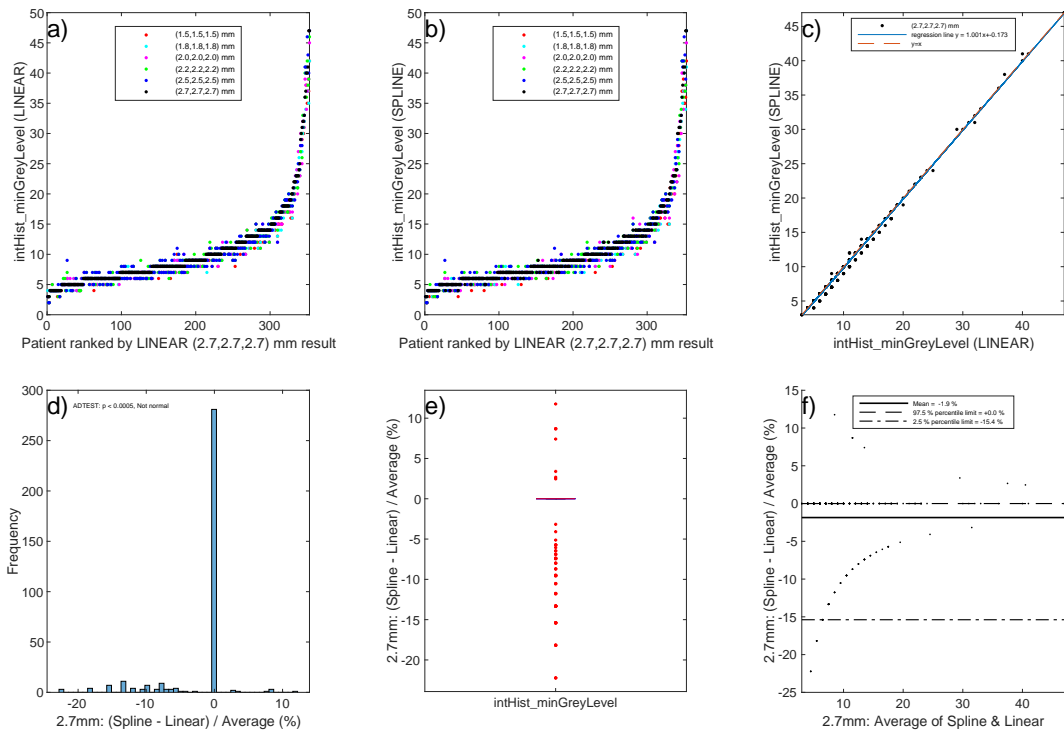

Figure 96: intHist-minGreyLevel

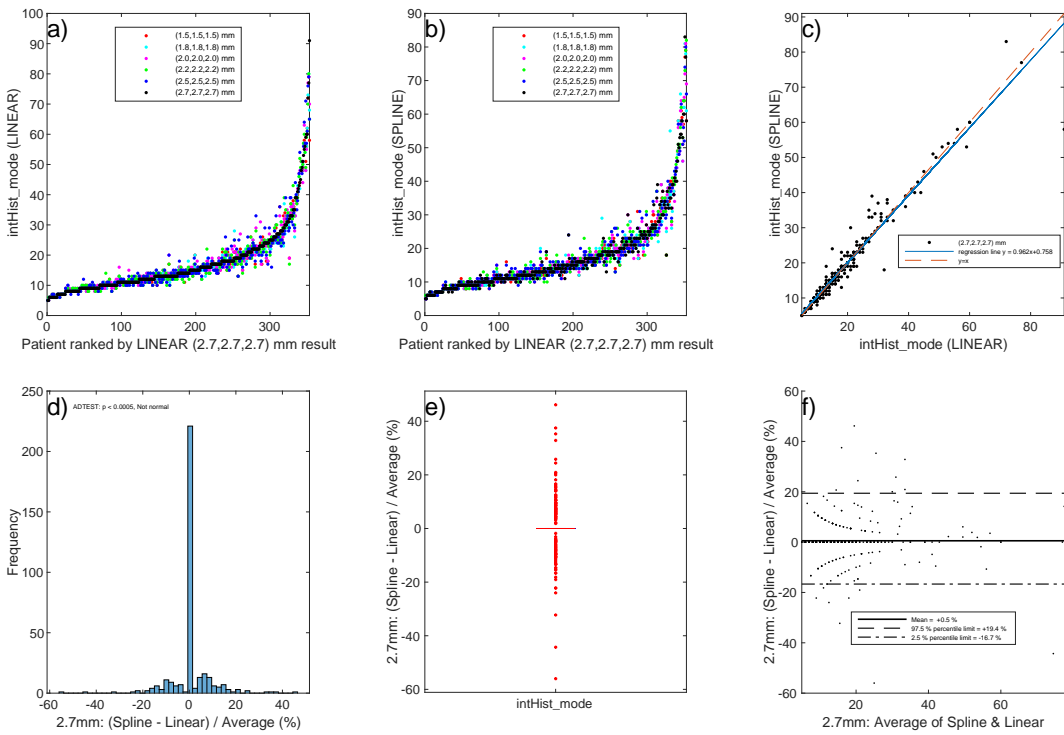

Figure 97: intHist-mode



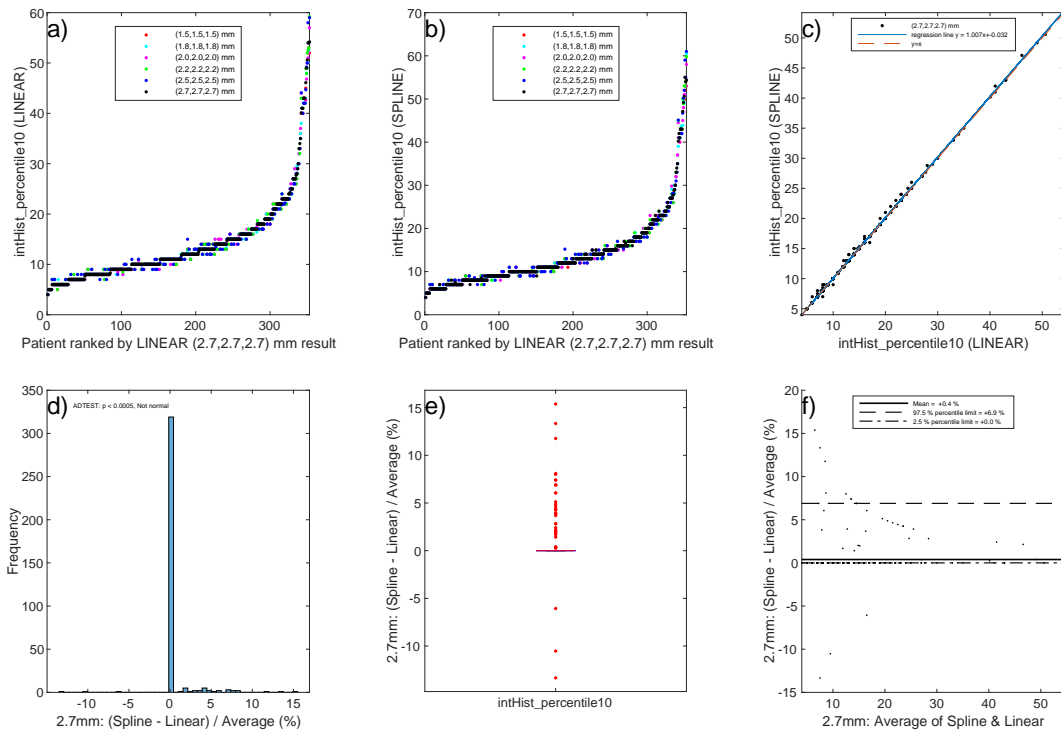

Figure 98: intHist-percentile10

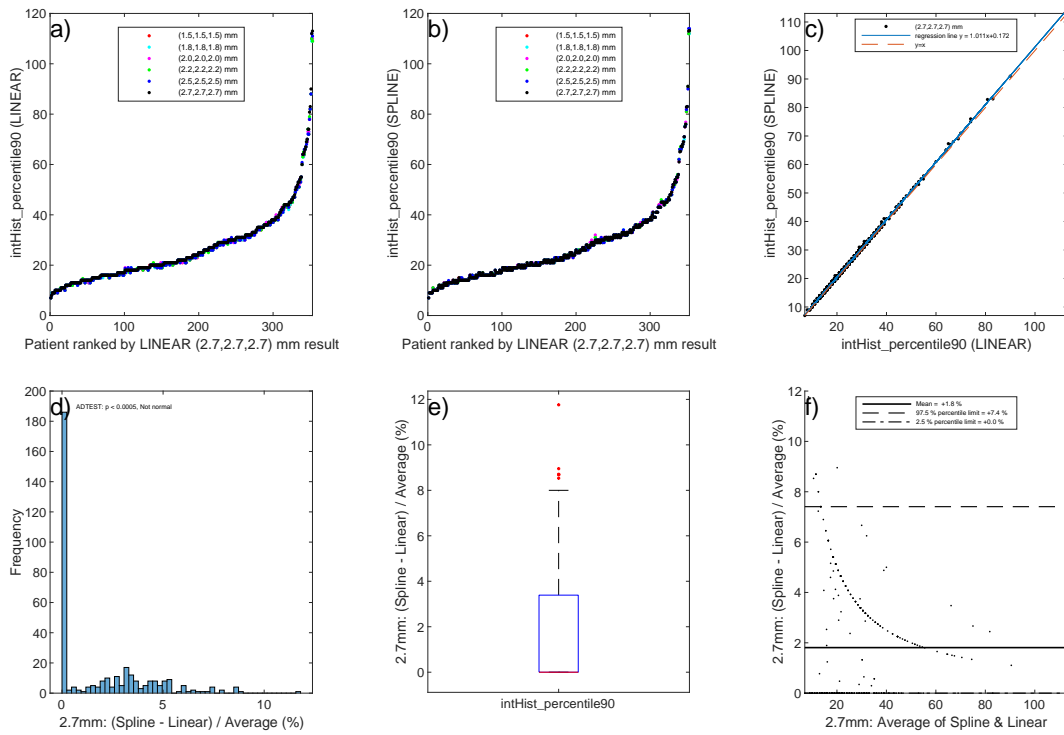

Figure 99: intHist-percentile90

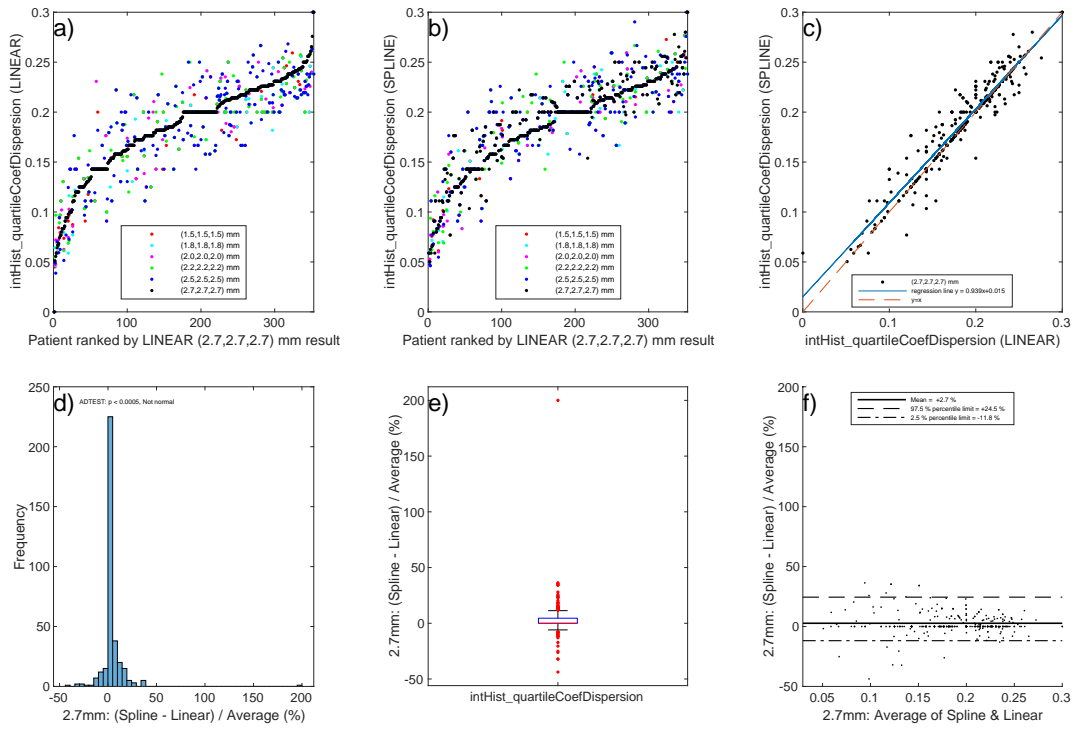

Figure 100: intHist-quartileCoefDispersion

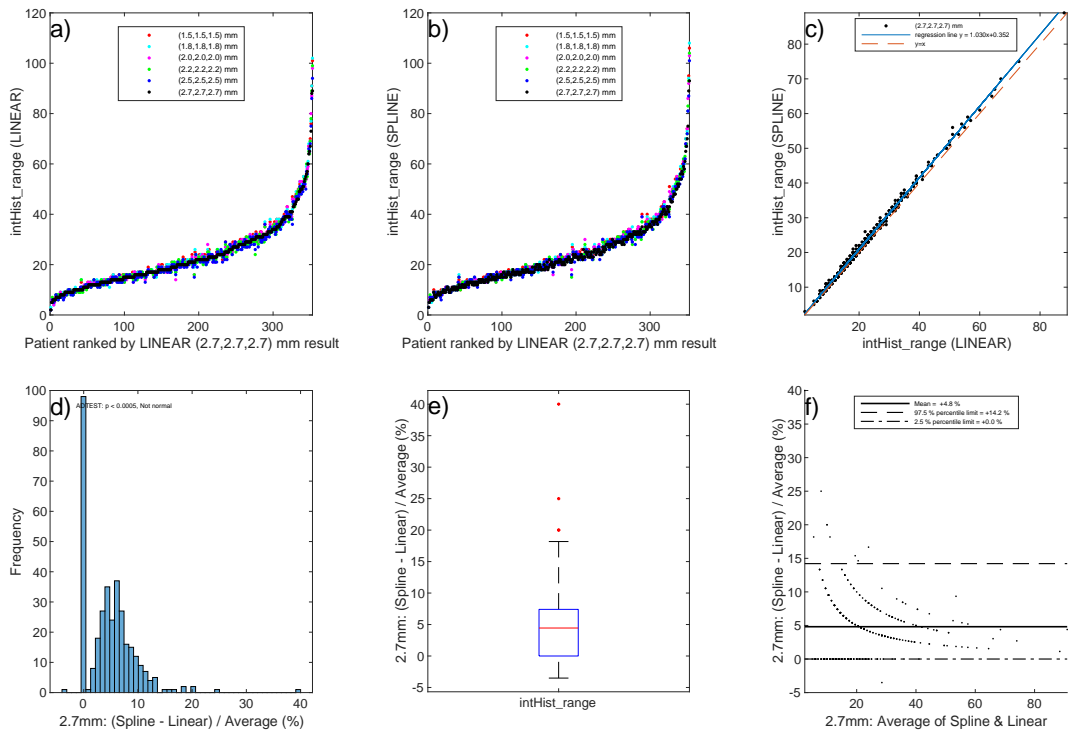

Figure 101: intHist-range

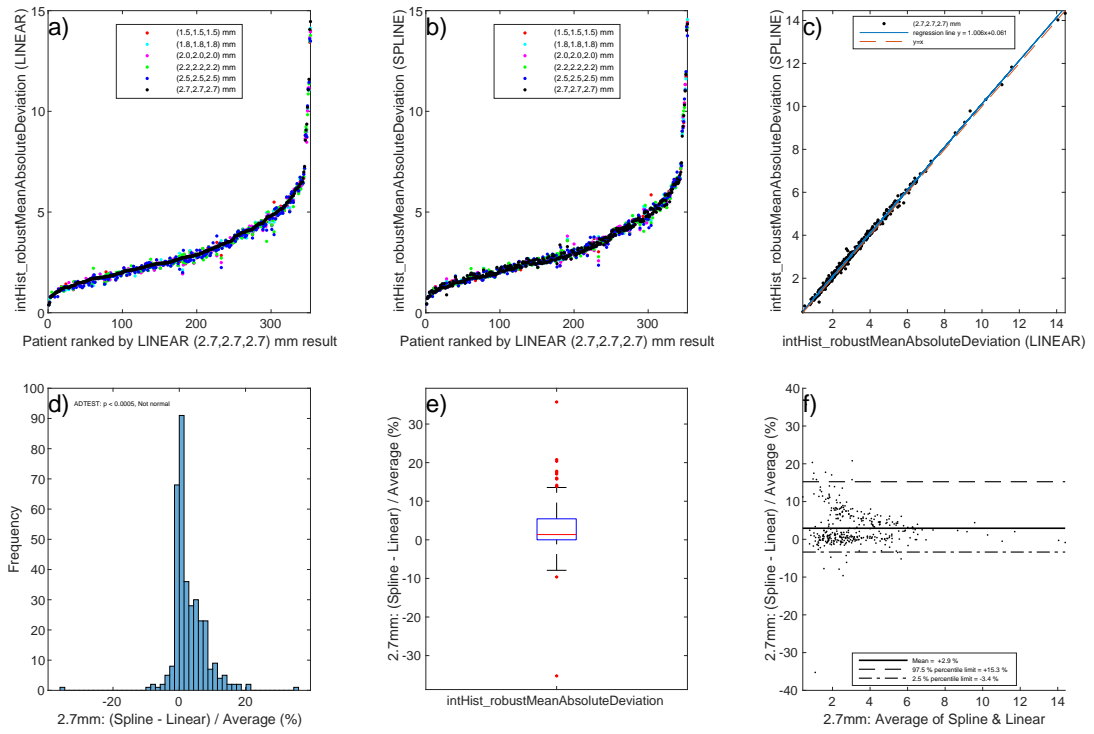

Figure 102: intHist-robustMeanAbsoluteDeviation

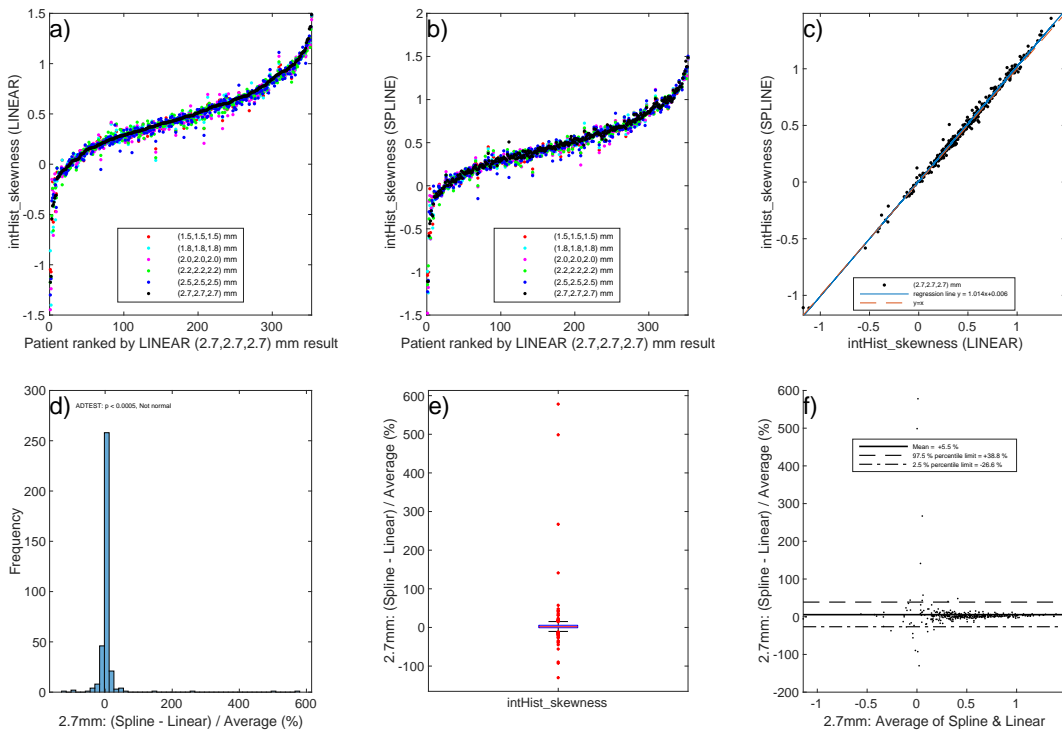

Figure 103: intHist-skewness

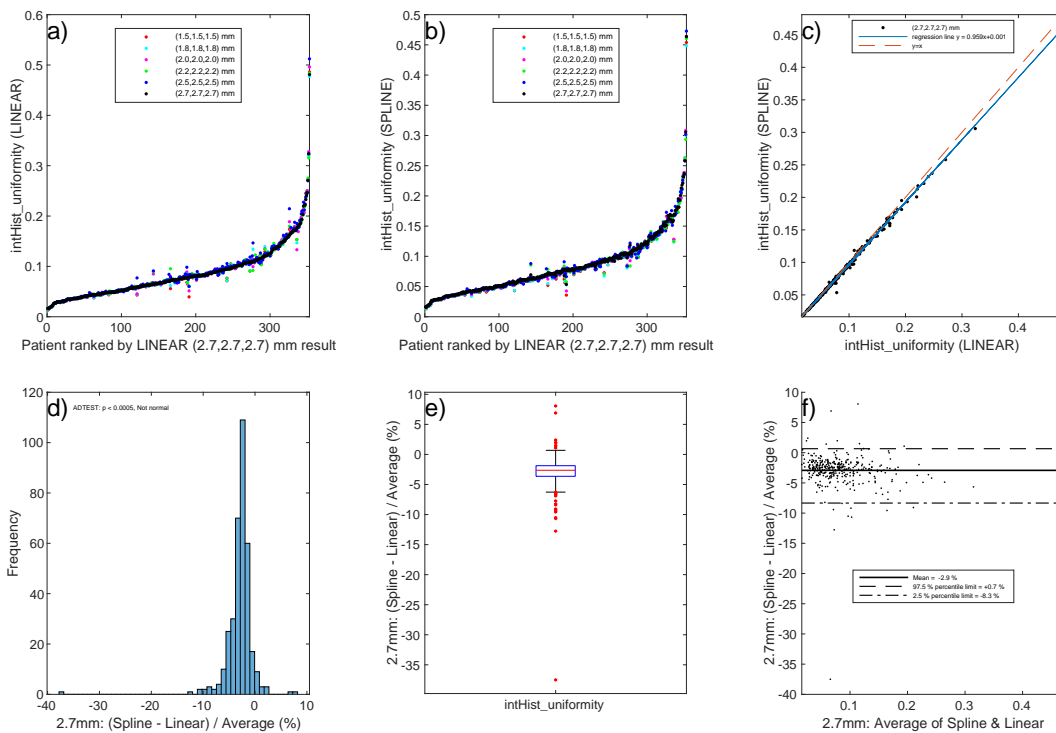

Figure 104: intHist-uniformity

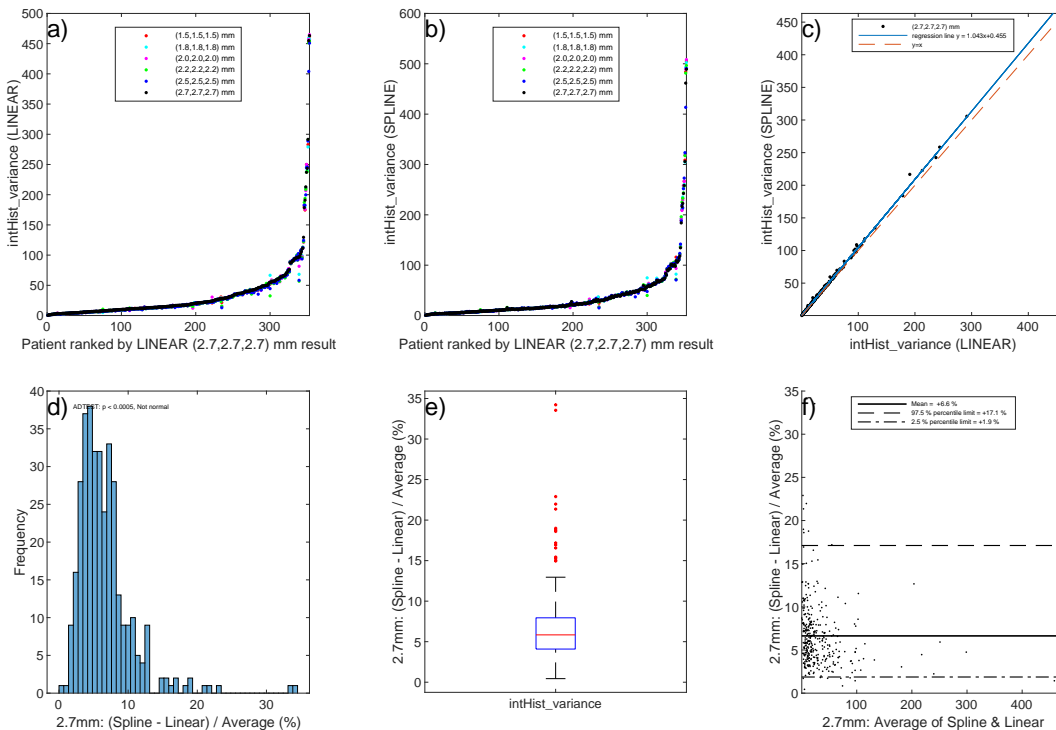

Figure 105: intHist-variance

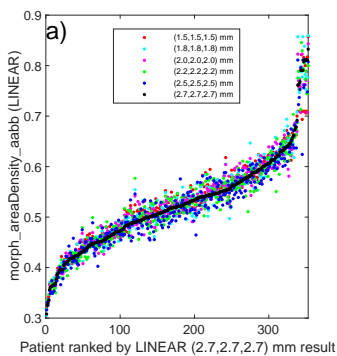

morph\_areaDensity\_aabb feature values only depend on mask and not the scan values.  
Masks are always interpolated linearly.

Figure 106: morph-areaDensity-aabb

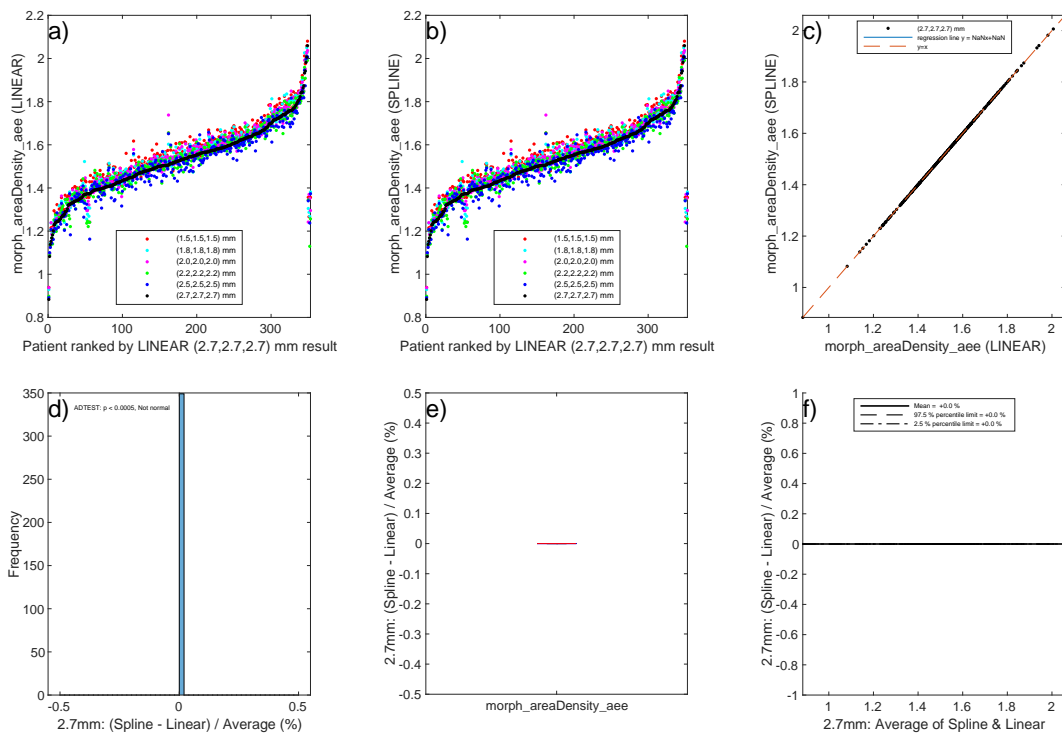

Figure 107: morph-areaDensity-aee

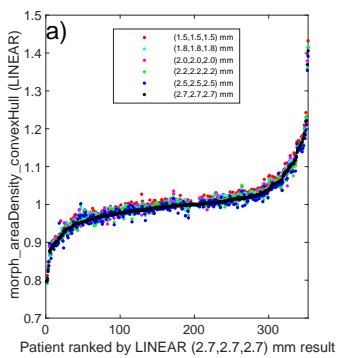

morph\_areaDensity\_convexHull feature values only depend on mask and not the scan values.

Masks are always interpolated linearly.

Figure 108: morph-areaDensity-convexHull

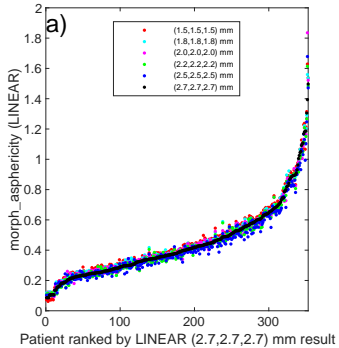

morph\_asphericity feature values only depend on mask and not the scan values.

Masks are always interpolated linearly.

Figure 109: morph-asphericity

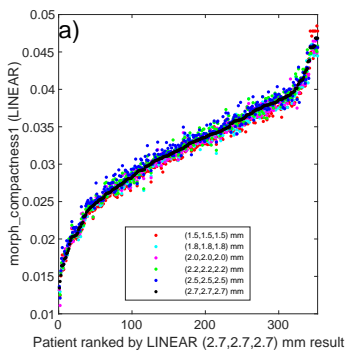

morph\_compactness1 feature values only depend on mask and not the scan values.

Masks are always interpolated linearly.

Figure 110: morph-compactness1

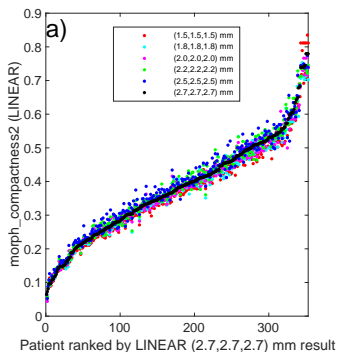

morph\_compactness2 feature values only depend on mask and not the scan values.

Masks are always interpolated linearly.

Figure 111: morph-compactness2

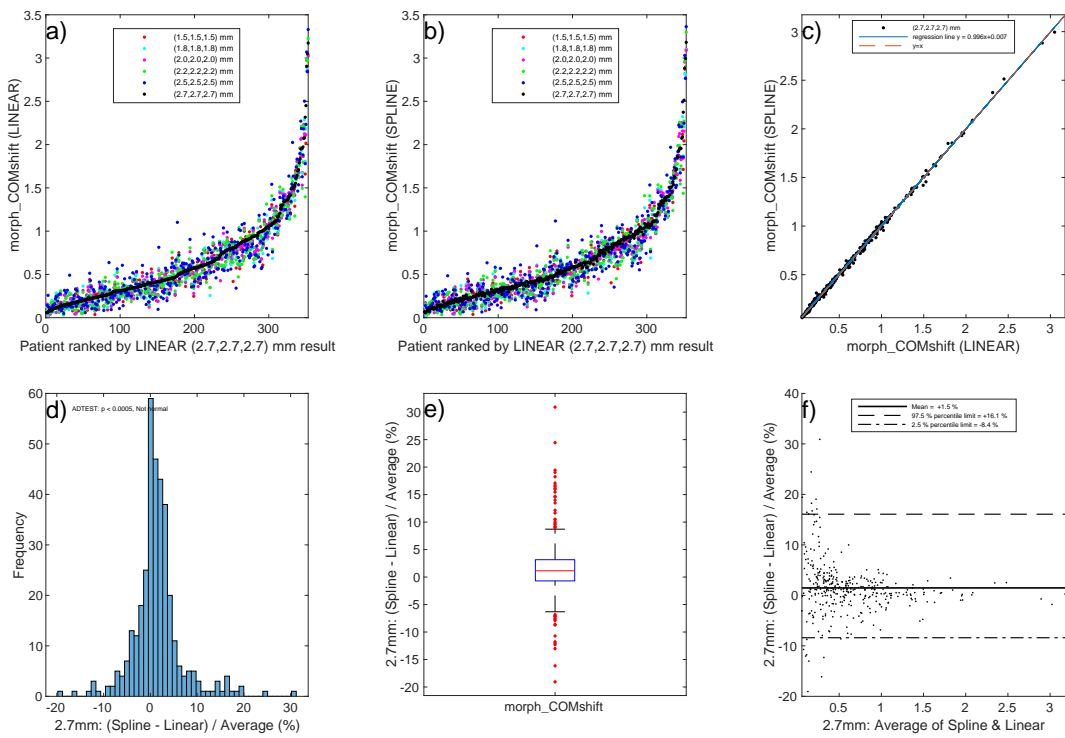

Figure 112: morph-COMshift

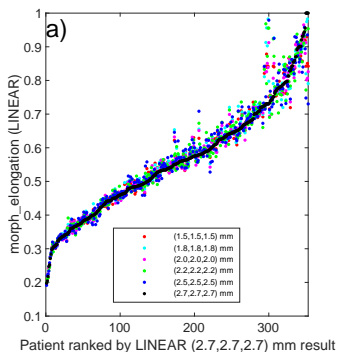

morph\_elongation feature values only depend on mask and not the scan values.

Masks are always interpolated linearly.

Figure 113: morph-elongation



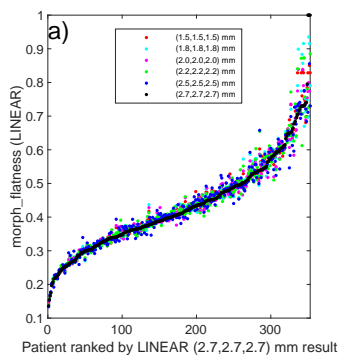

morph\_flatness feature values only depend on mask and not the scan values.

Masks are always interpolated linearly.

Figure 114: morph-flatness

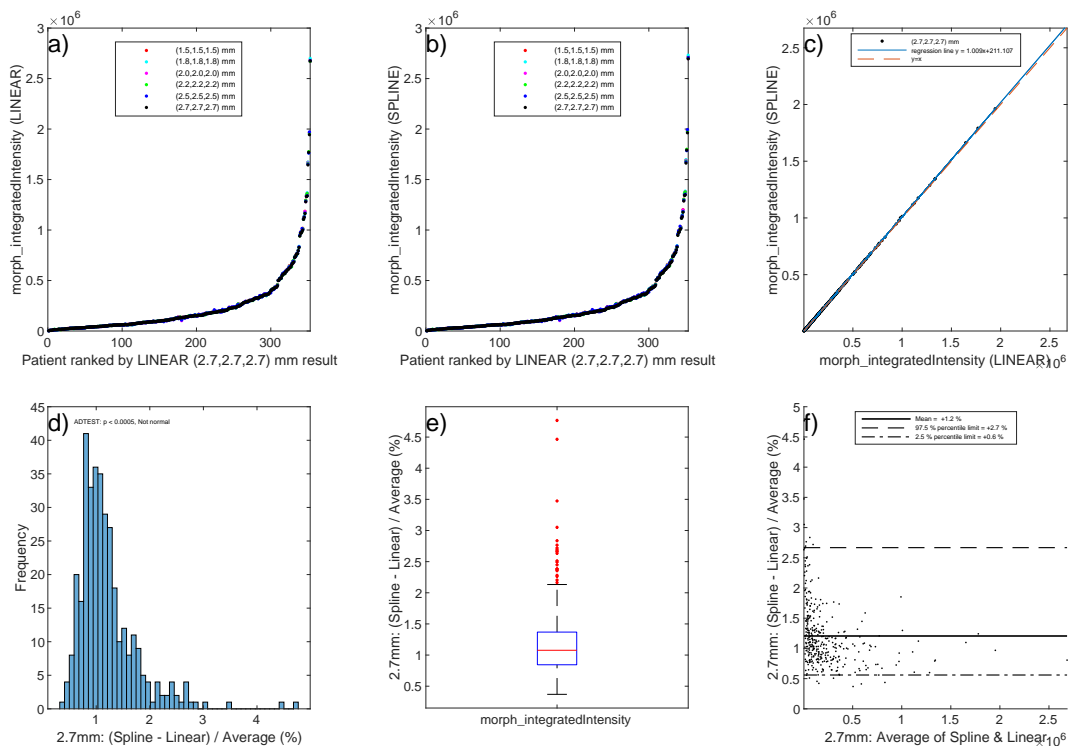

Figure 115: morph-integratedIntensity

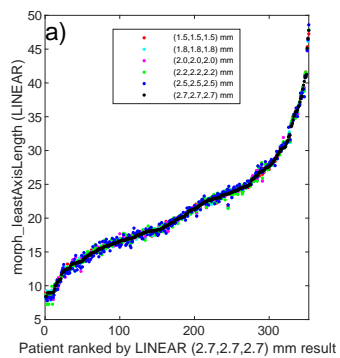

morph\_leastAxisLength feature values only depend on mask and not the scan values.

Masks are always interpolated linearly.

Figure 116: morph-leastAxisLength

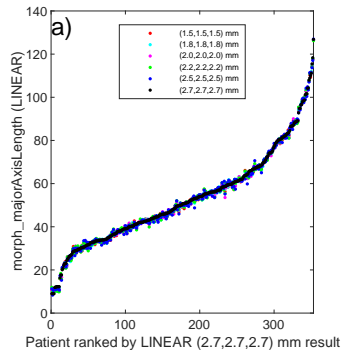

morph\_majorAxisLength feature values only depend on mask and not the scan values.

Masks are always interpolated linearly.

Figure 117: morph-majorAxisLength

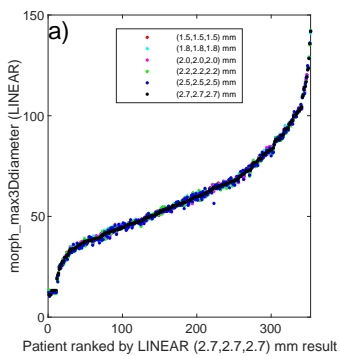

morph\_max3Ddiameter feature values only depend on mask and not the scan values.

Masks are always interpolated linearly.

Figure 118: morph-max3Ddiameter

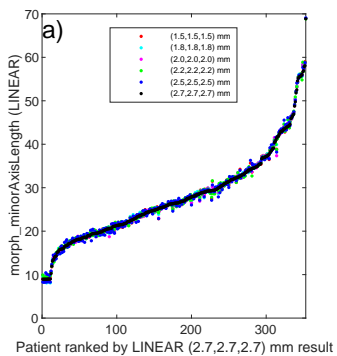

morph\_minorAxisLength feature values only depend on mask and not the scan values.

Masks are always interpolated linearly.

Figure 119: morph-minorAxisLength

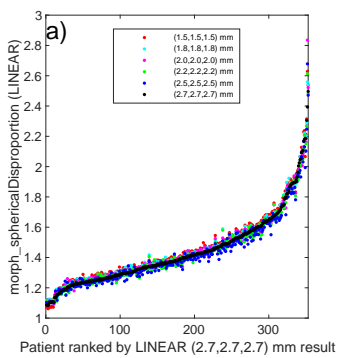

morph\_sphericalDisproportion feature values only depend on mask and not the scan values.

Masks are always interpolated linearly.

Figure 120: morph-sphericalDisproportion

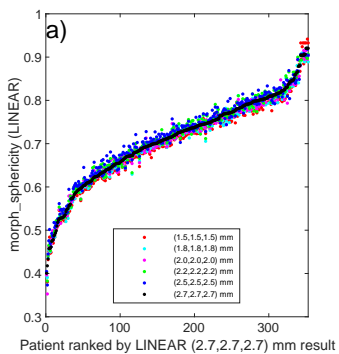

morph\_sphericity feature values only depend on mask and not the scan values.

Masks are always interpolated linearly.

Figure 121: morph-sphericity

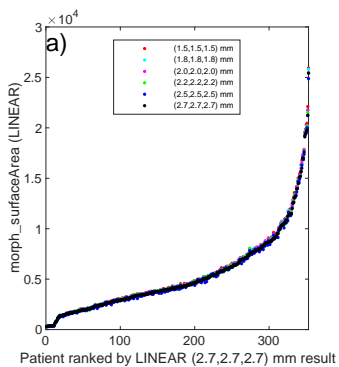

morph\_surfaceArea feature values only depend on mask and not the scan values.

Masks are always interpolated linearly.

Figure 122: morph-surfaceArea

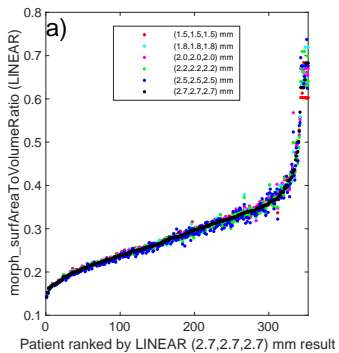

morph\_surfAreaToVolumeRatio feature values only depend on mask and not the scan values.

Masks are always interpolated linearly.

Figure 123: morph-surfAreaToVolumeRatio

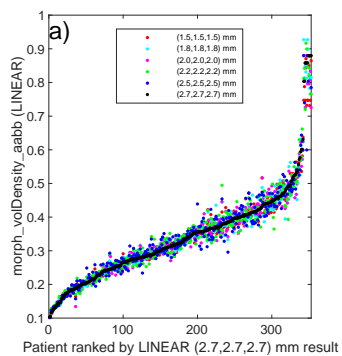

morph\_volDensity\_aabb feature values only depend on mask and not the scan values.

Masks are always interpolated linearly.

Figure 124: morph-volDensity-aabb

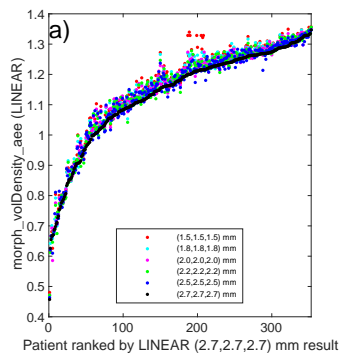

morph\_volDensity\_aee feature values only depend on mask and not the scan values.

Masks are always interpolated linearly.

Figure 125: morph-volDensity-aee

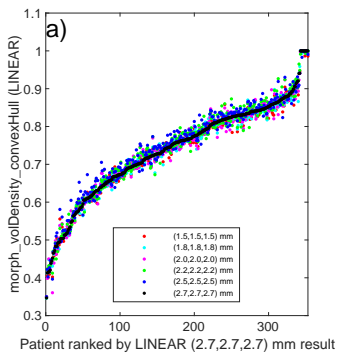

morph\_volDensity\_convexHull feature values only depend on mask and not the scan values.

Masks are always interpolated linearly.

Figure 126: morph-volDensity-convexHull

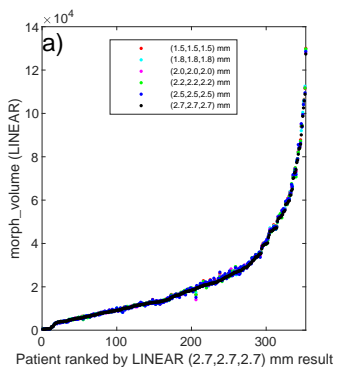

morph\_volume feature values only depend on mask and not the scan values.

Masks are always interpolated linearly.

Figure 127: morph-volume

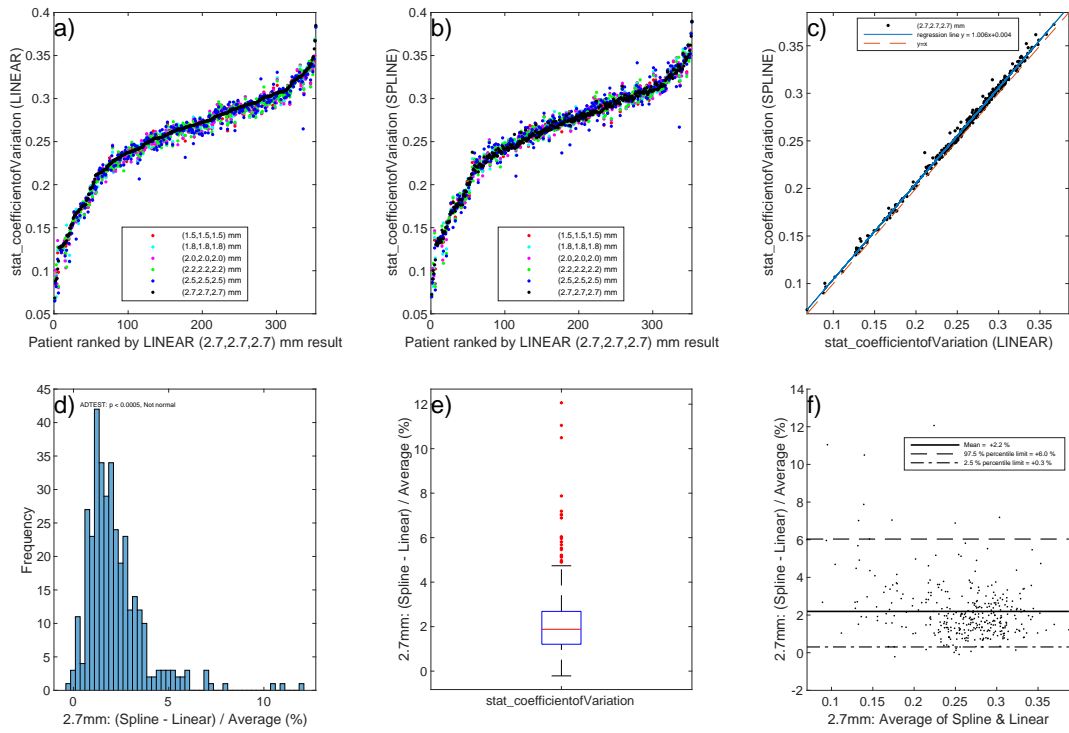

Figure 128: stat-coefficientofVariation

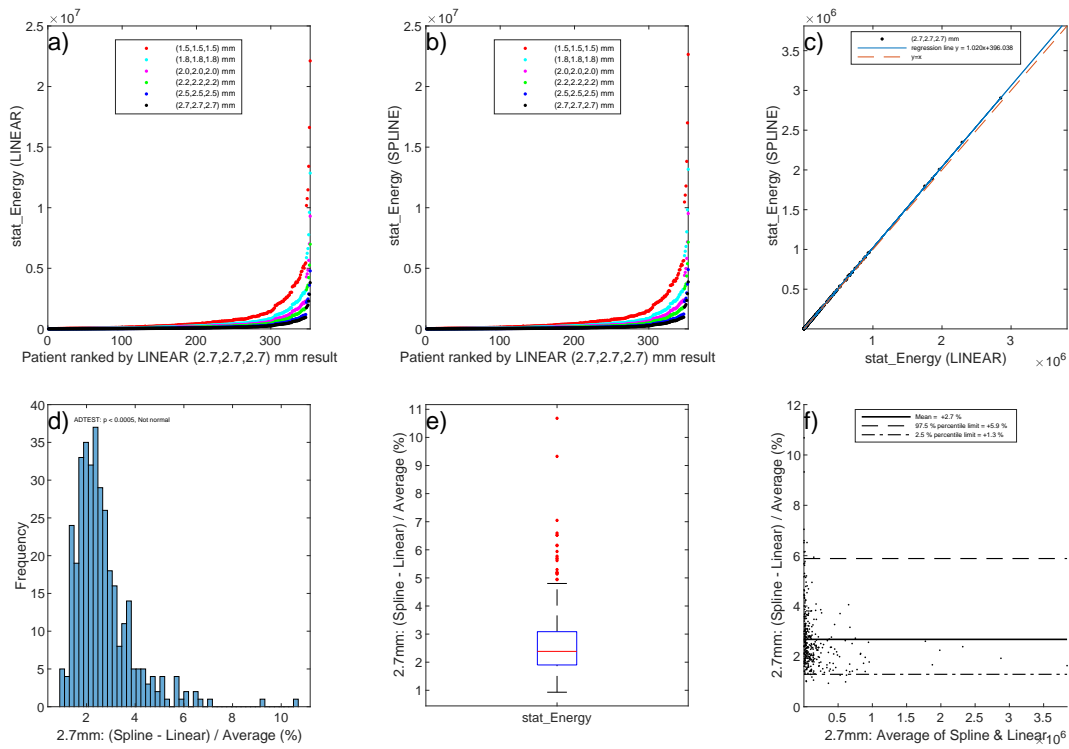

Figure 129: stat-Energy



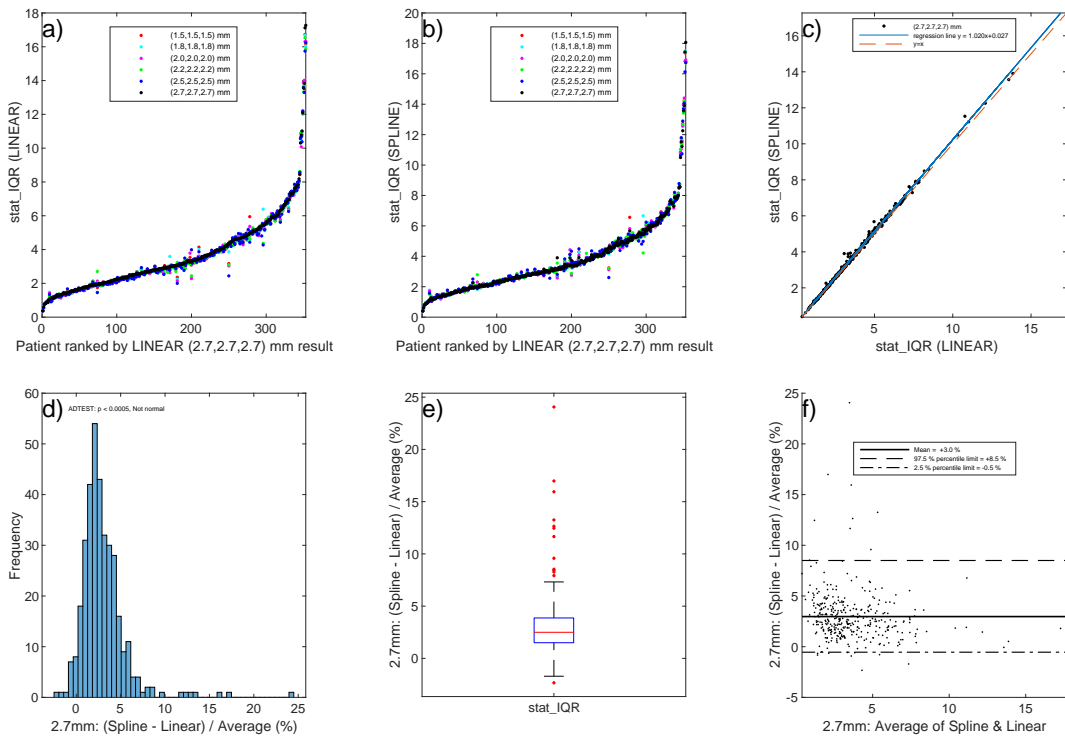

Figure 130: stat-IQR

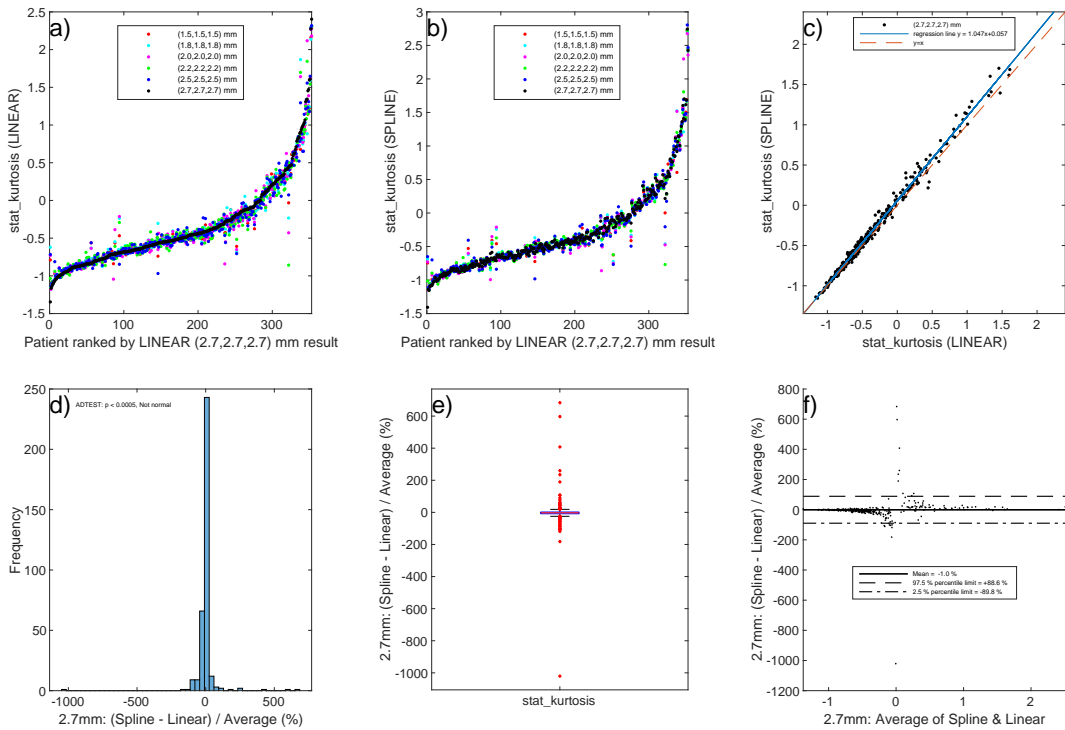

Figure 131: stat-kurtosis

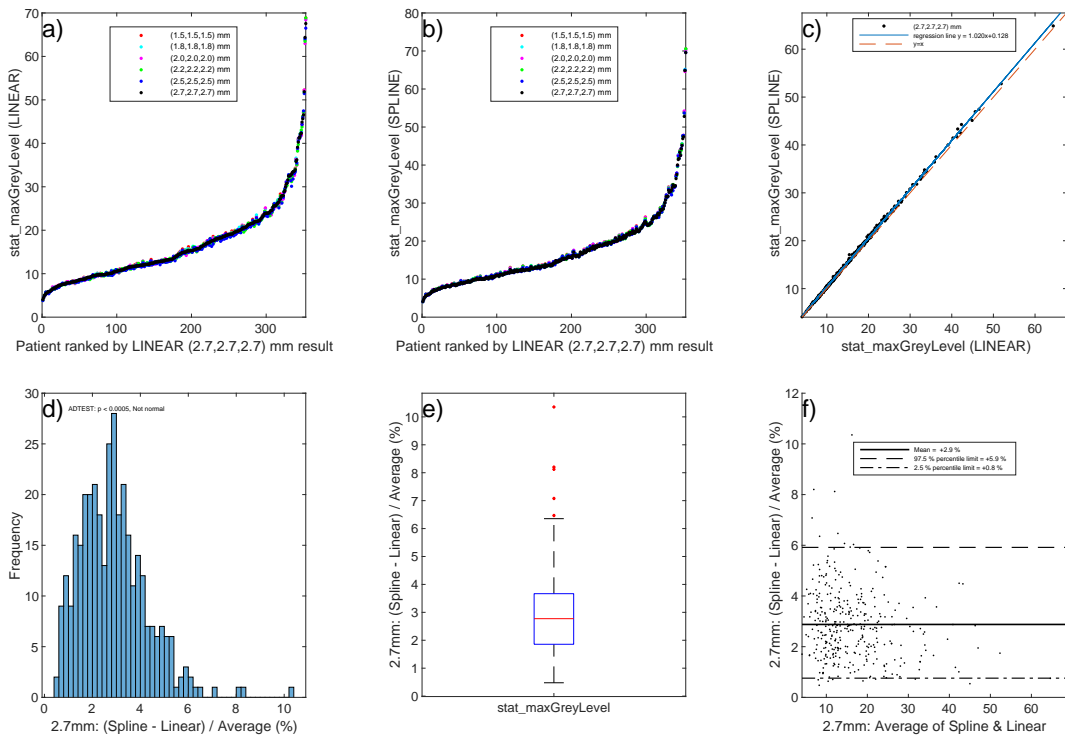

Figure 132: stat-maxGreyLevel

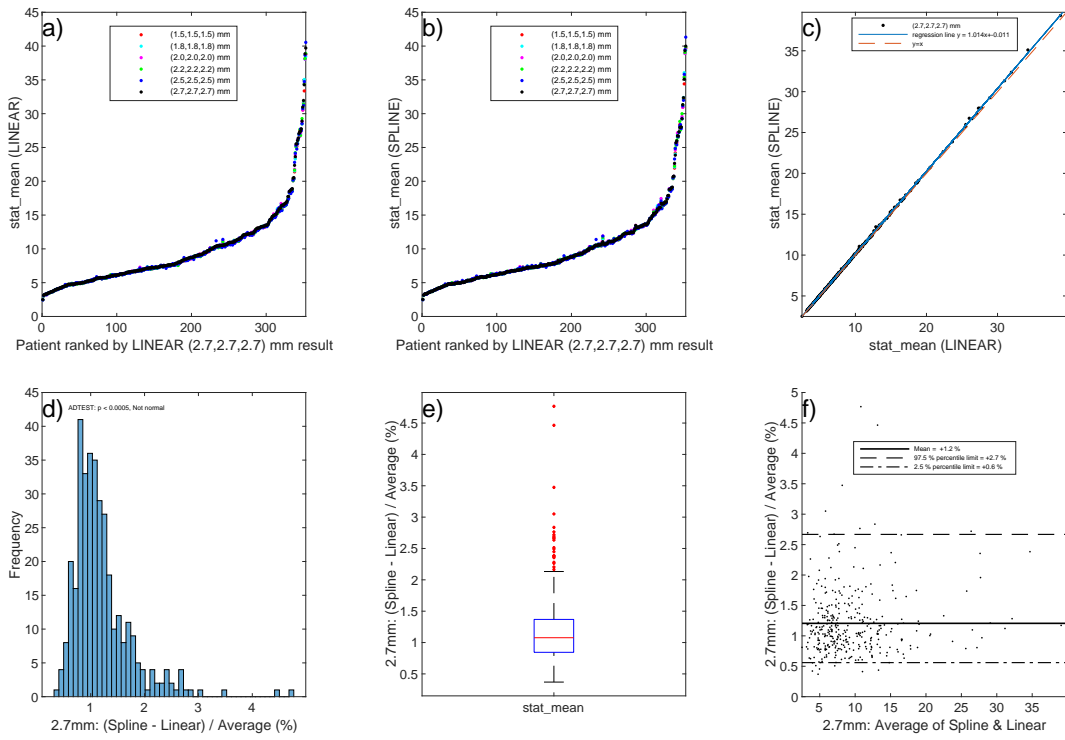

Figure 133: stat-mean

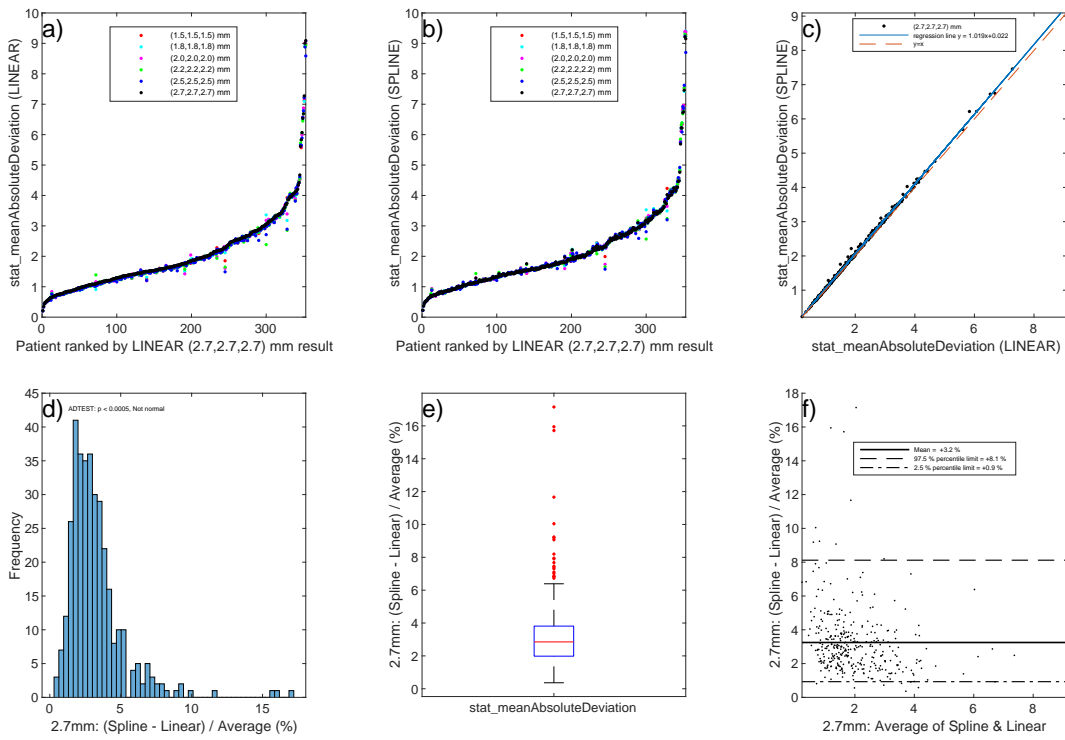

Figure 134: stat-meanAbsoluteDeviation

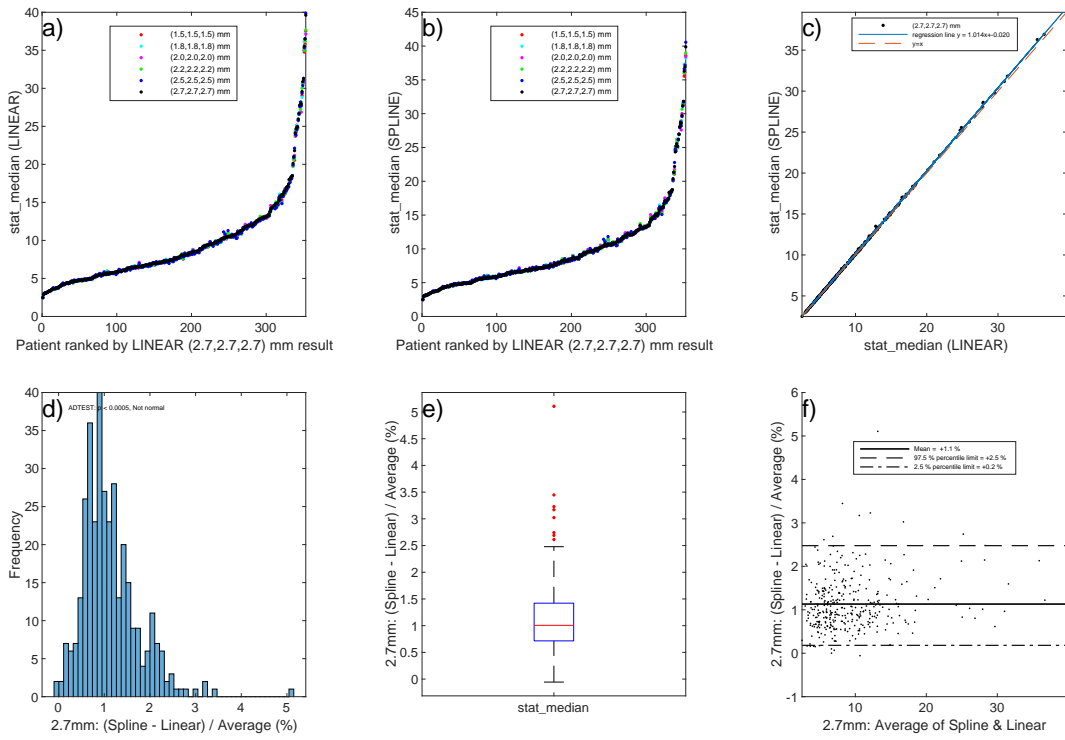

Figure 135: stat-median

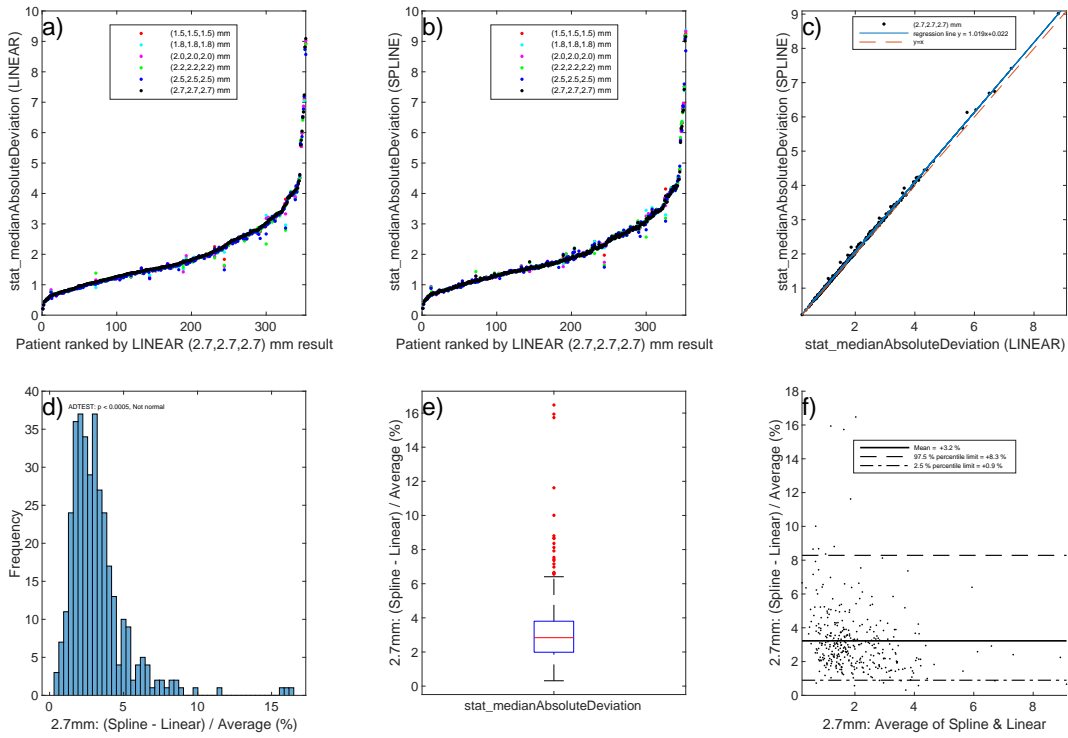

Figure 136: stat-medianAbsoluteDeviation

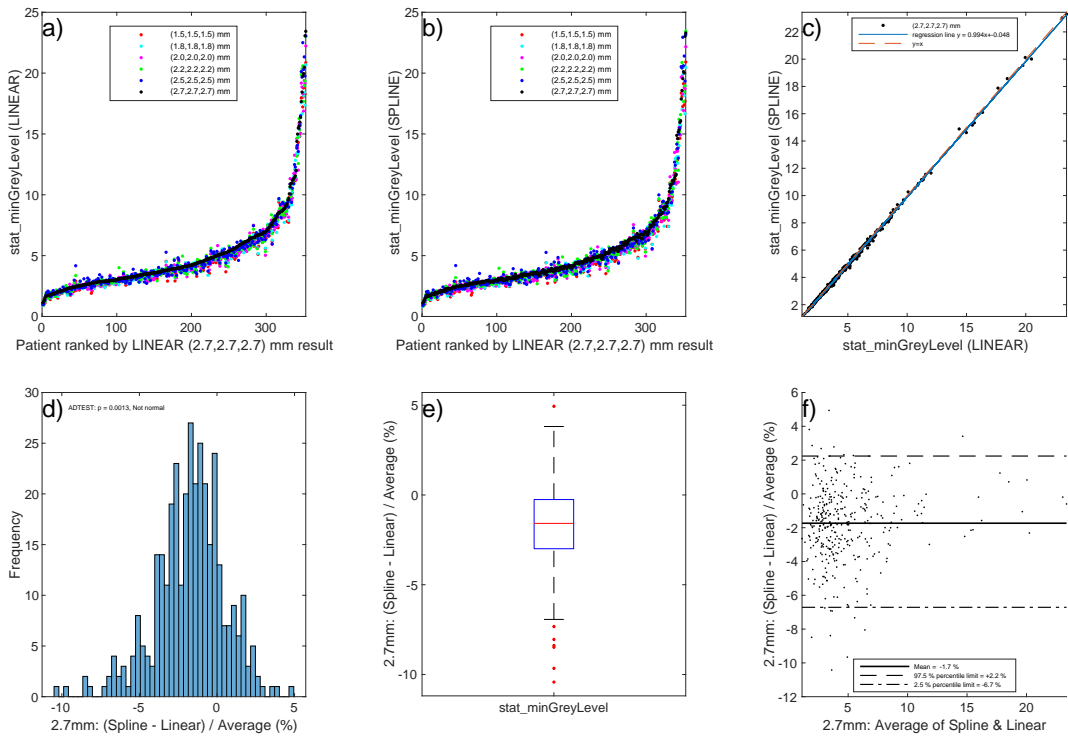

Figure 137: stat-minGreyLevel

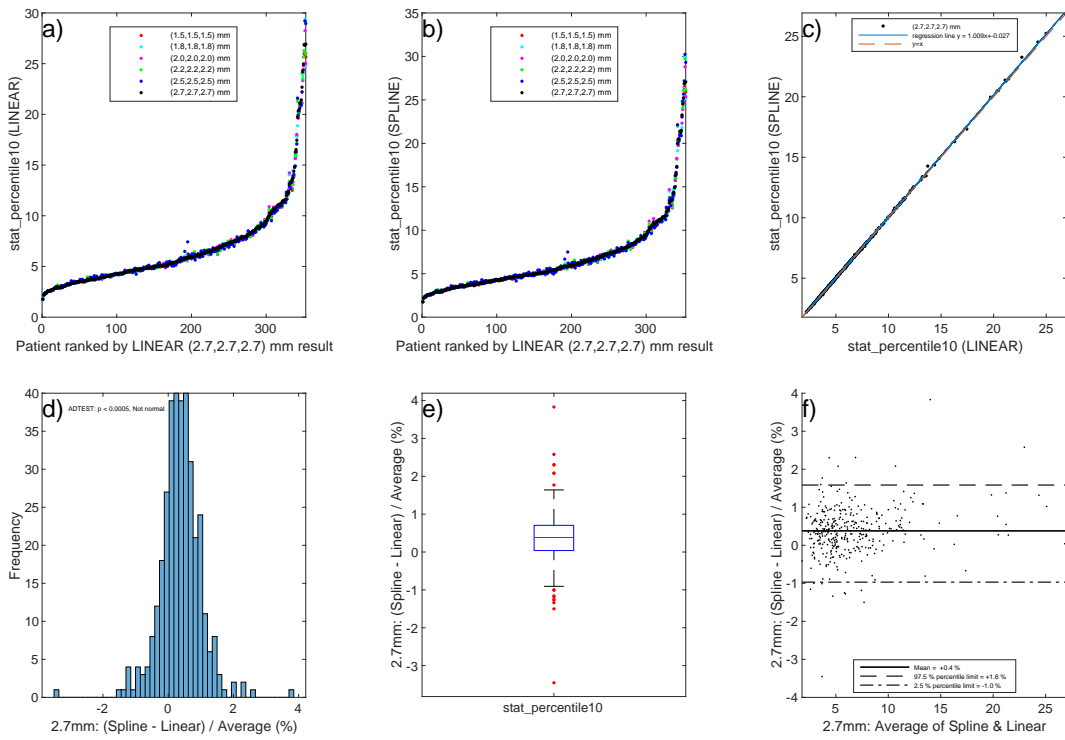

Figure 138: stat-percentile10

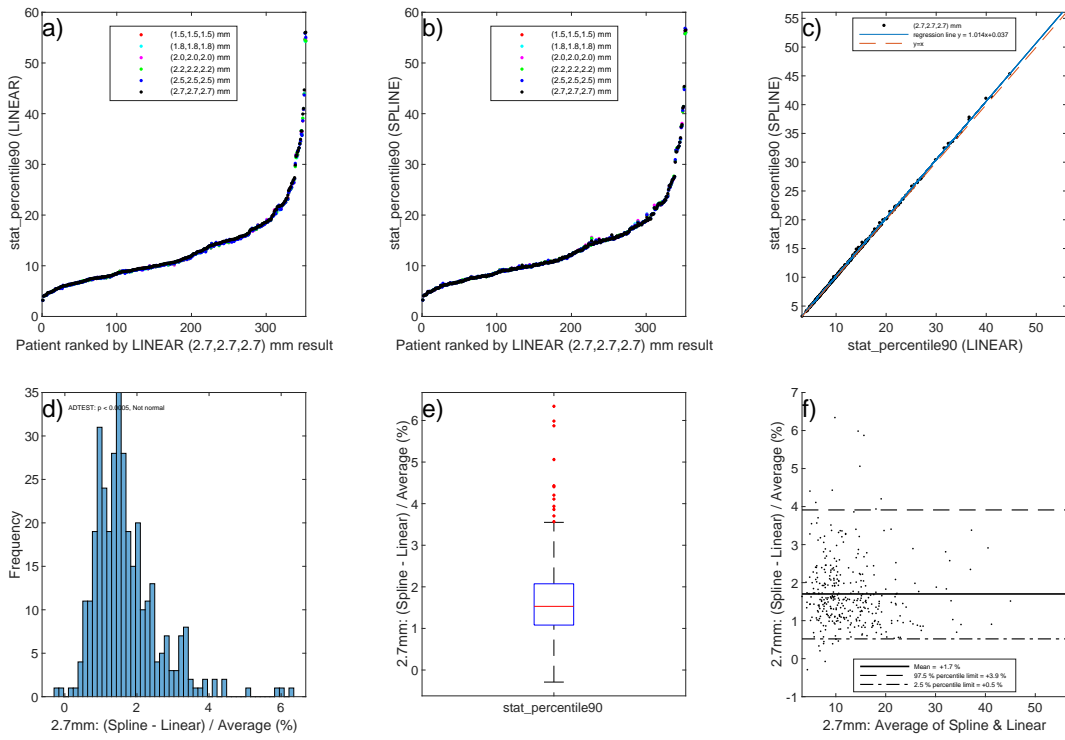

Figure 139: stat-percentile90

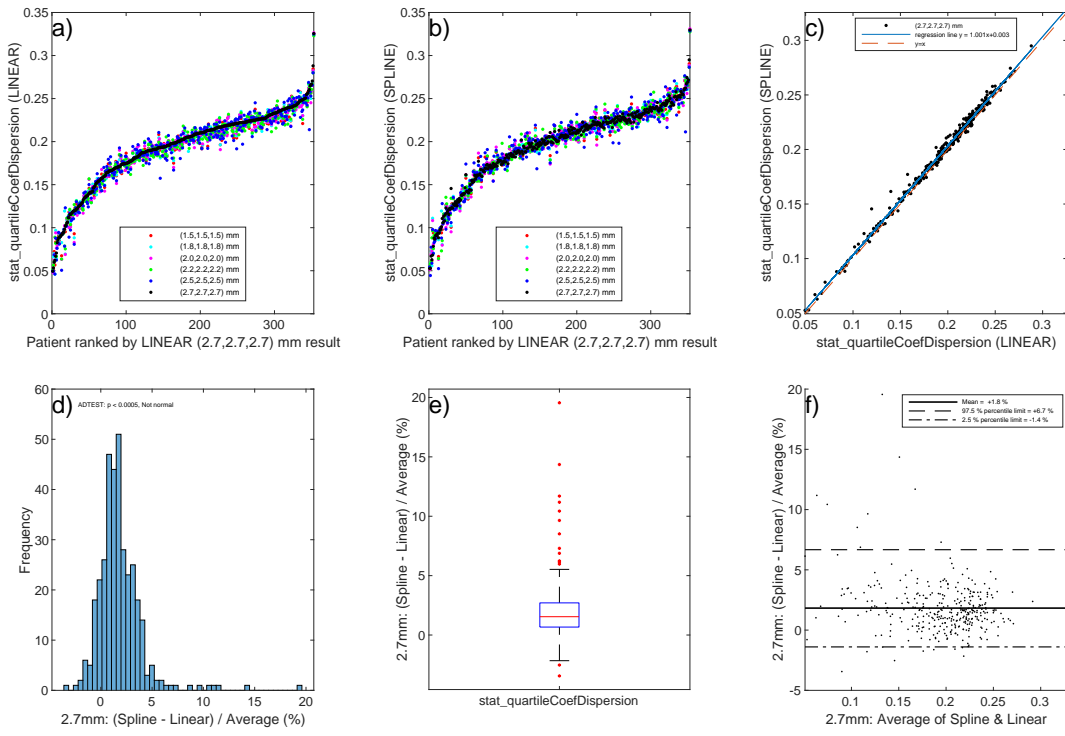

Figure 140: stat-quartileCoefDispersion

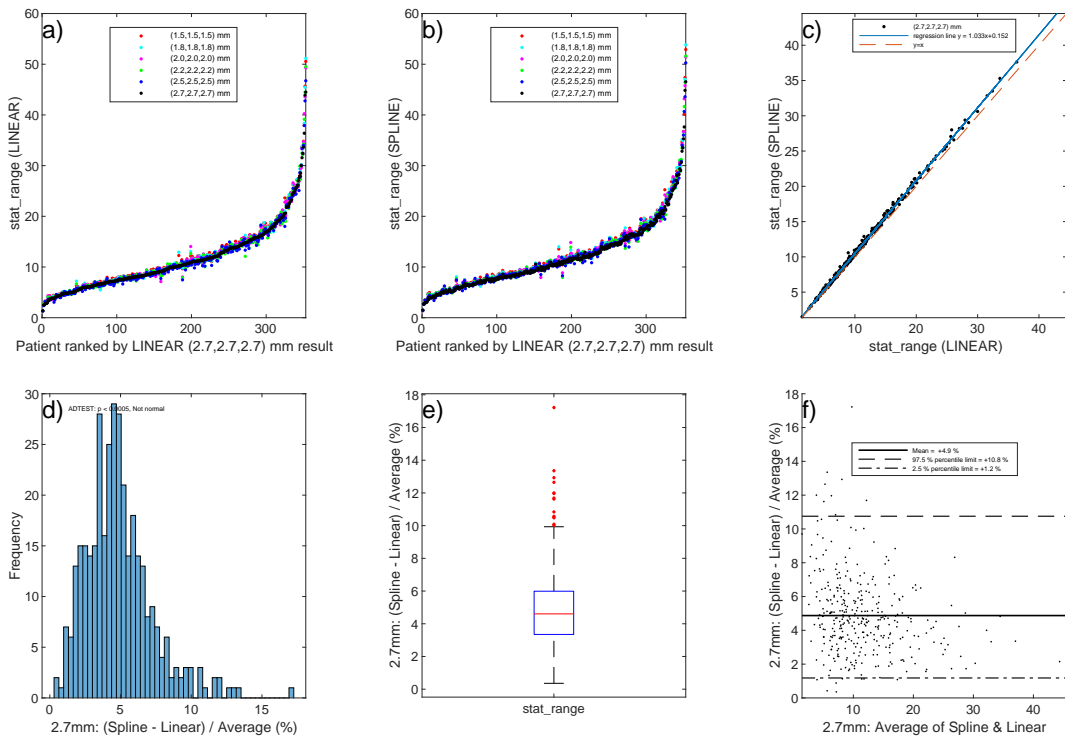

Figure 141: stat-range

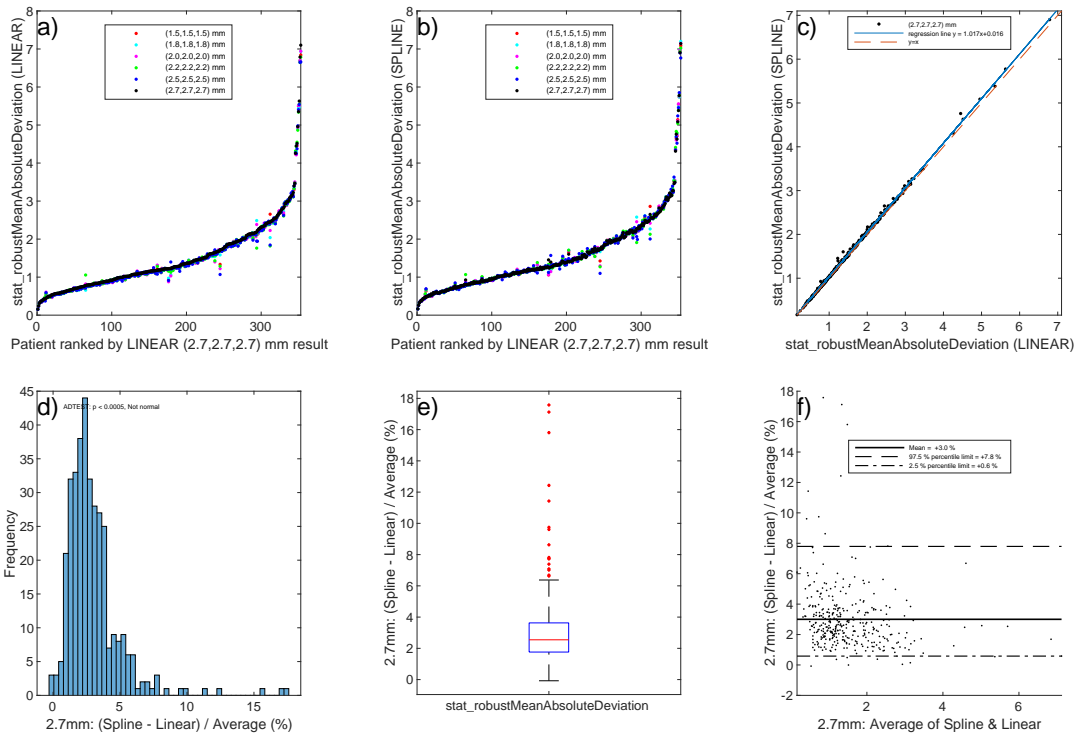

Figure 142: stat-robustMeanAbsoluteDeviation

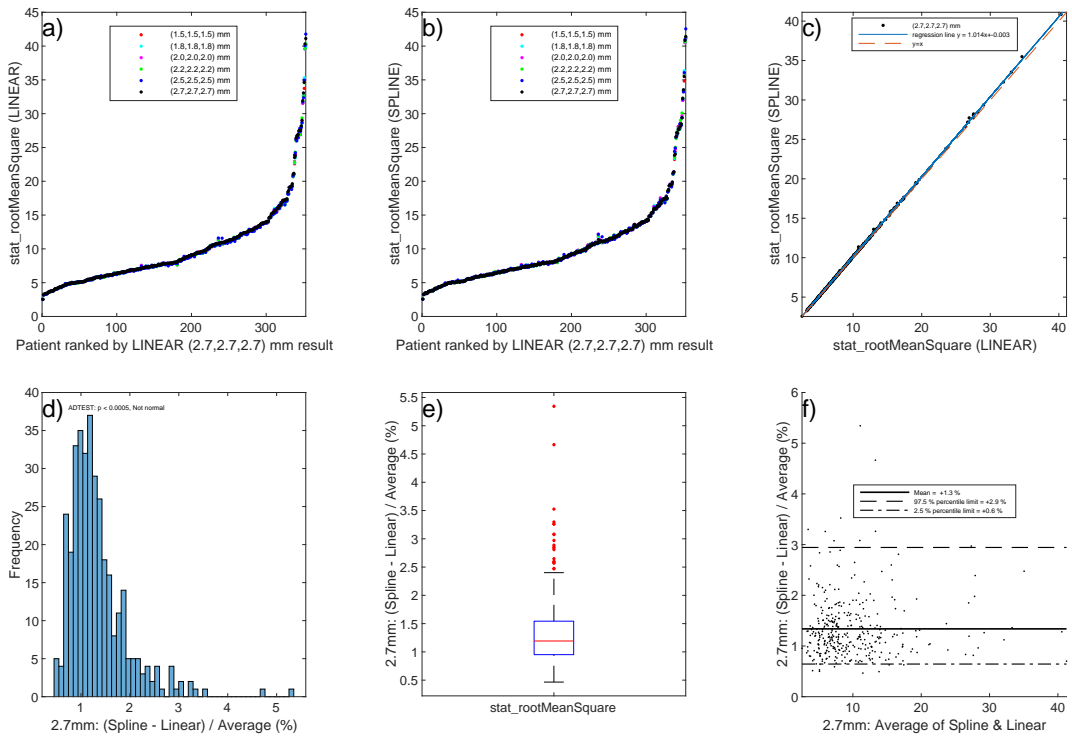

Figure 143: stat-rootMeanSquare

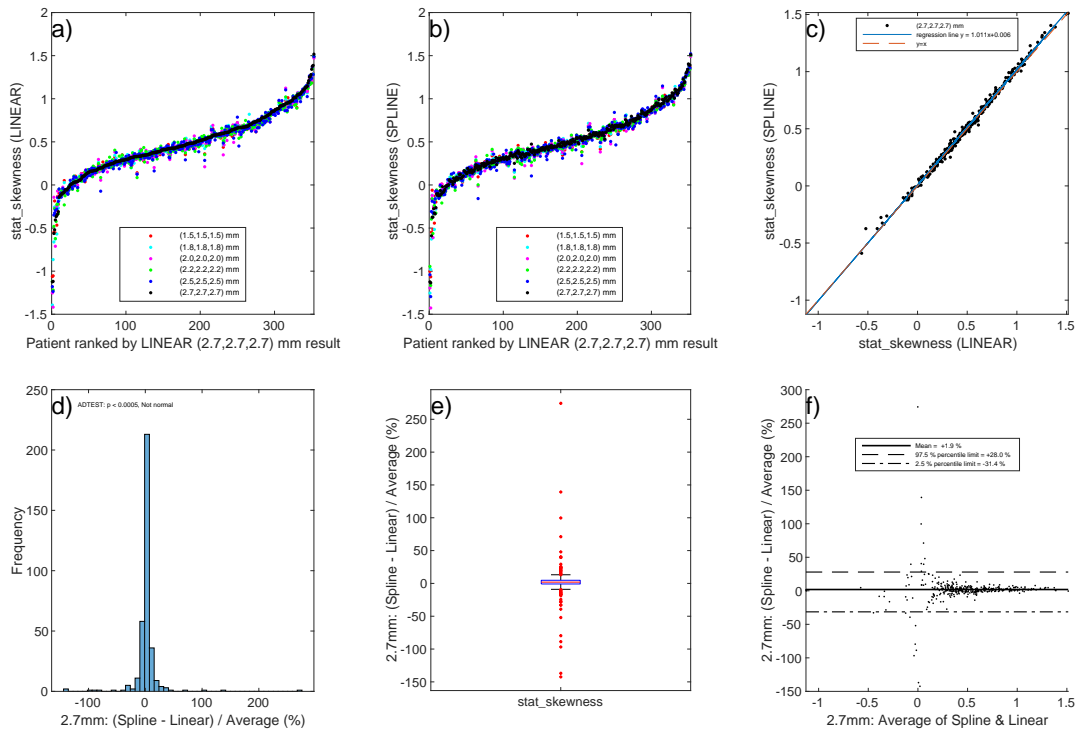

Figure 144: stat-skewness

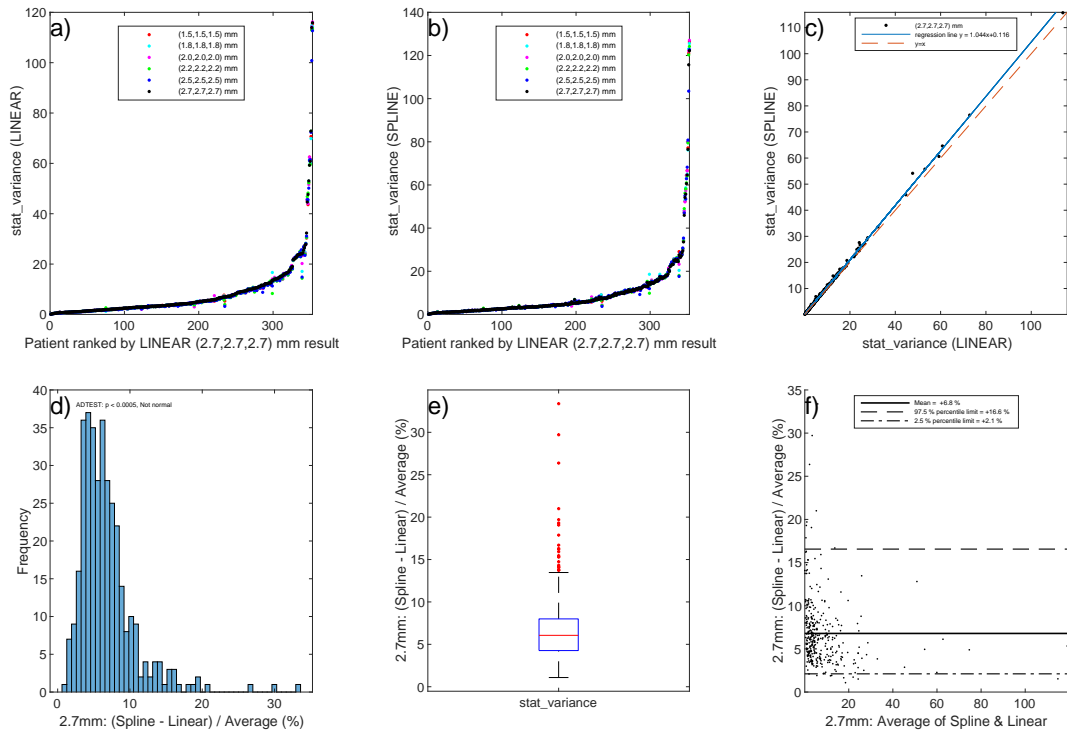

Figure 145: stat-variance



---

## 5 Modelling Interpolation response

### 5.1 Plot explanation

The 34 features marked as correctable due to systematic behaviour underwent the surface fitting method for correction as described in the methods section of the main document. The surfaces, developed using the testing cohort, were evaluated by rescaling feature values in the validation cohort. For each VOI, feature value and voxel size were plotted against the percentage change in feature value compared to the 2.7mm voxel dimension result. Surfaces were generated using the fit function from MATLAB's curve fitting toolbox (MathWorks, Natick, MA, USA). For VOIs with the 2.7mm voxel dimension, the percentage change in feature value compared to the 2.7mm result is clearly zero.

This process was demonstrated in the main manuscript in Fig.4 for the feature glrl feature run length Non uniformity. Below we plot the same visualisations for all 34 features that we attempted to correct.

For each figure, plot a) is the testing dataset feature values and voxel sizes plotted against the percentage change in feature values. Plot b) is a ranked plot of the validation dataset for a feature before applying a correction. Plot c) is the validation dataset after applying the correction based on equation (1) in the main manuscript.

5.2 Surface fit corrections

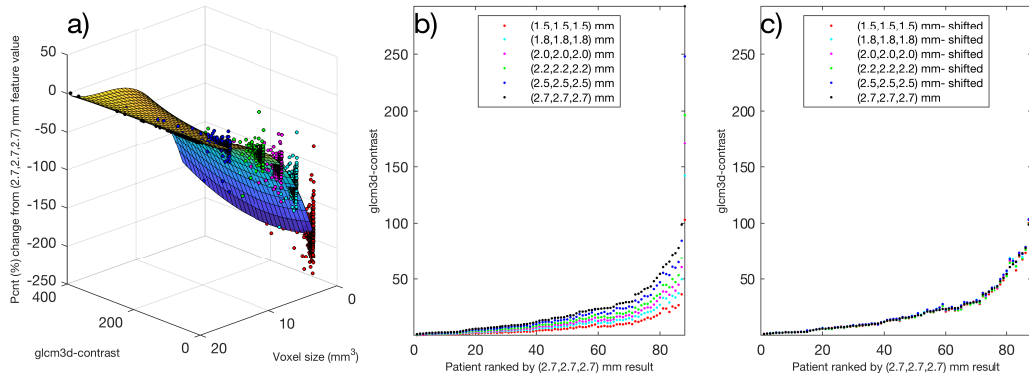

Figure 146: Modelling response: glm3d-contrast

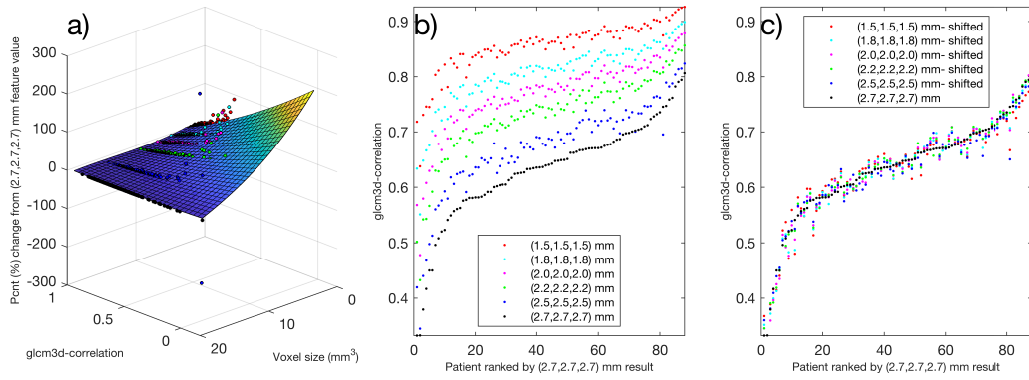

Figure 147: Modelling response: glm3d-correlation

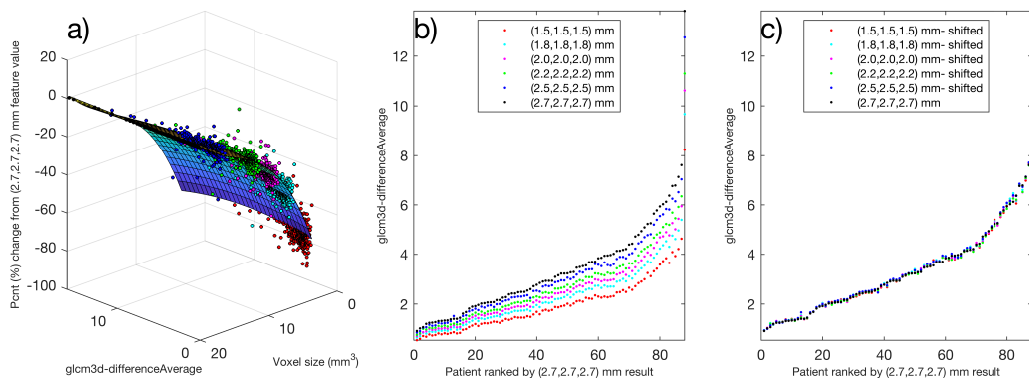

Figure 148: Modelling response: glm3d-differenceAverage

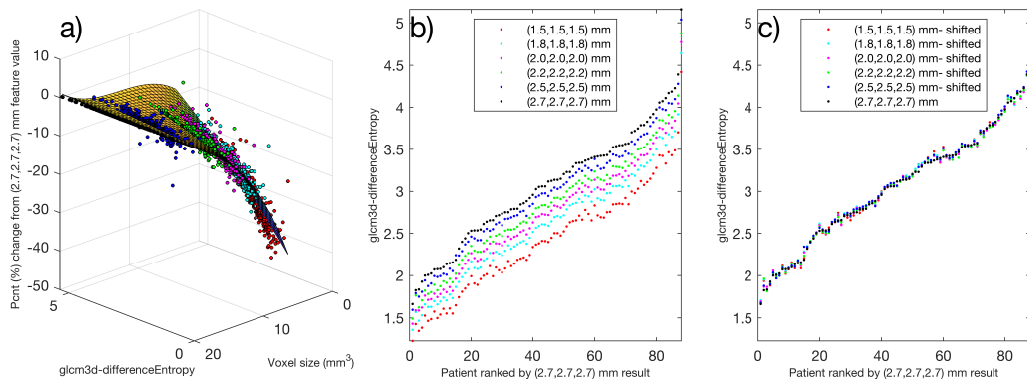

Figure 149: Modelling response: glm3d-differenceEntropy

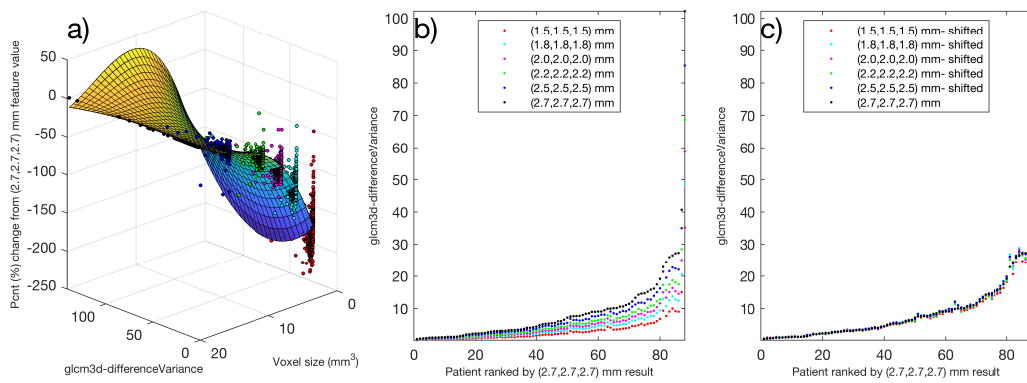

Figure 150: Modelling response: glm3d-differenceVariance

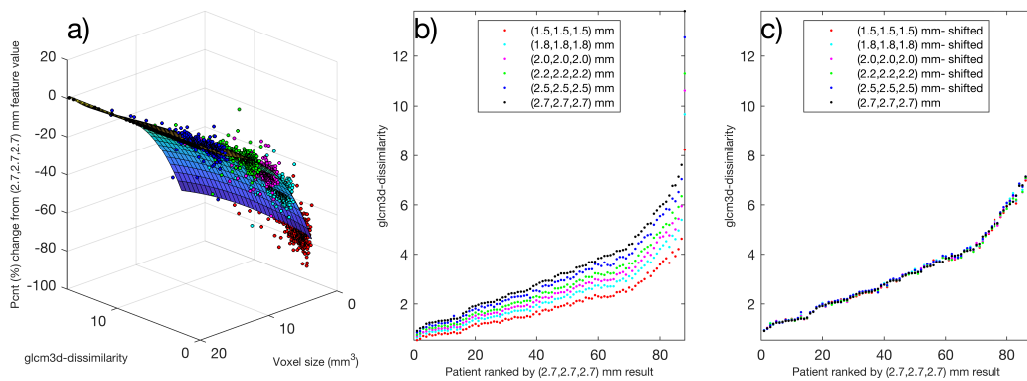

Figure 151: Modelling response: glm3d-dissimilarity

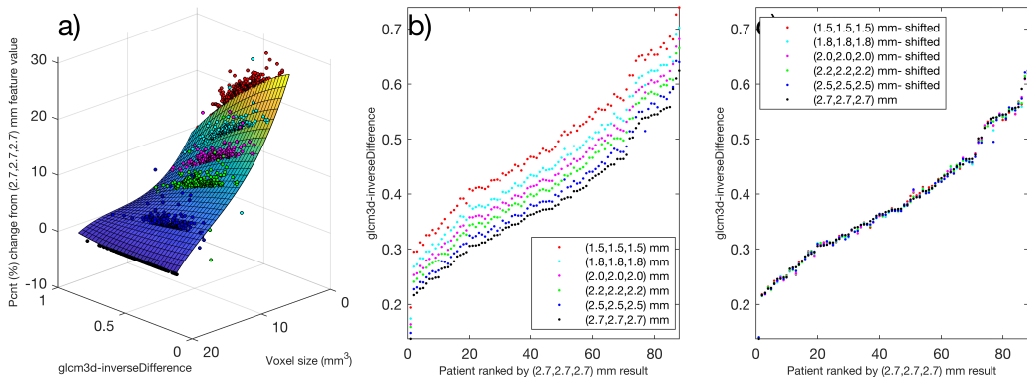

Figure 152: Modelling response: glm3d-inverseDifference

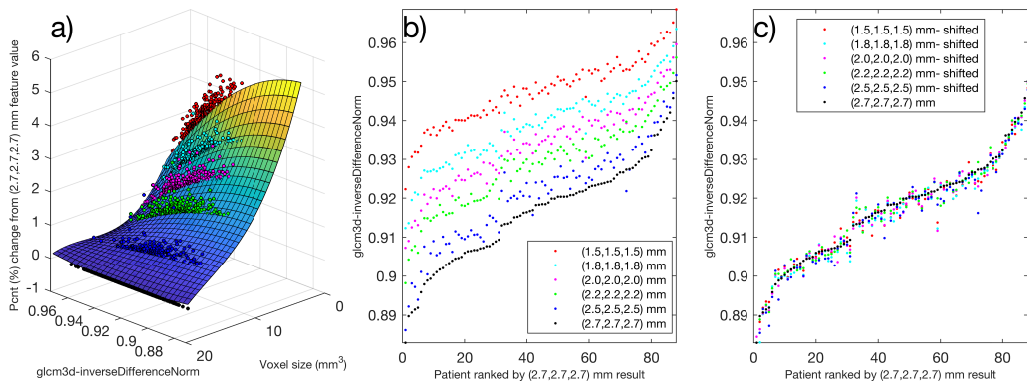

Figure 153: Modelling response: glm3d-inverseDifferenceNorm

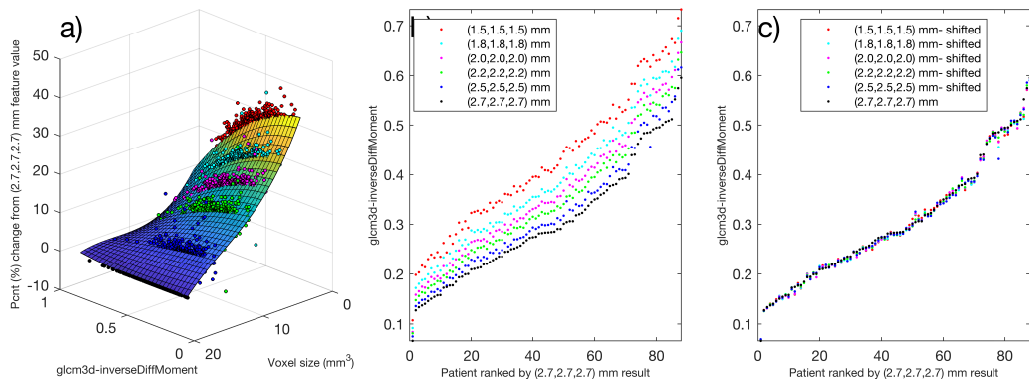

Figure 154: Modelling response: `glcm3d-inverseDiffMoment`

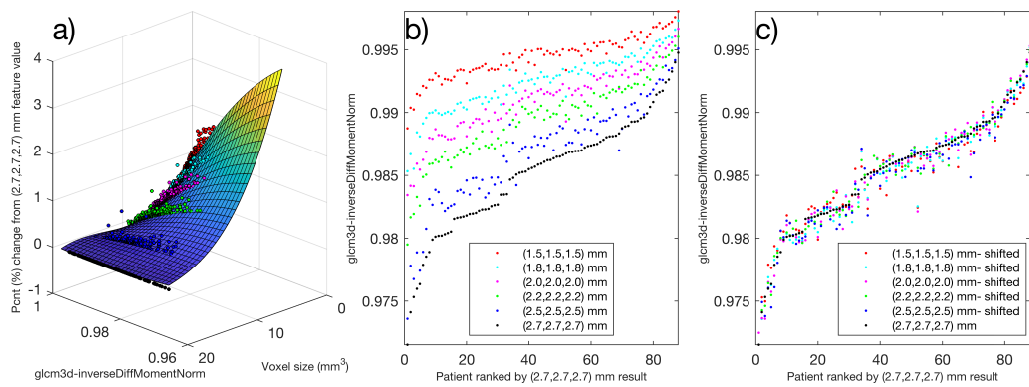

Figure 155: Modelling response: `glcm3d-inverseDiffMomentNorm`

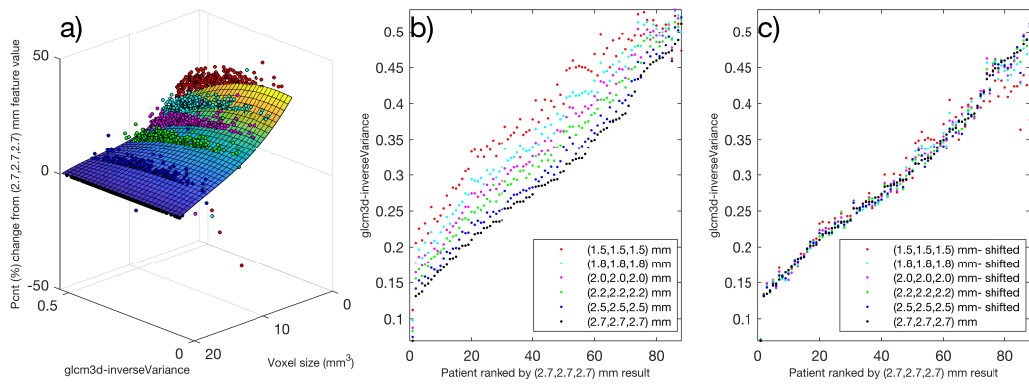

Figure 156: Modelling response: `glm3d-inverseVariance`

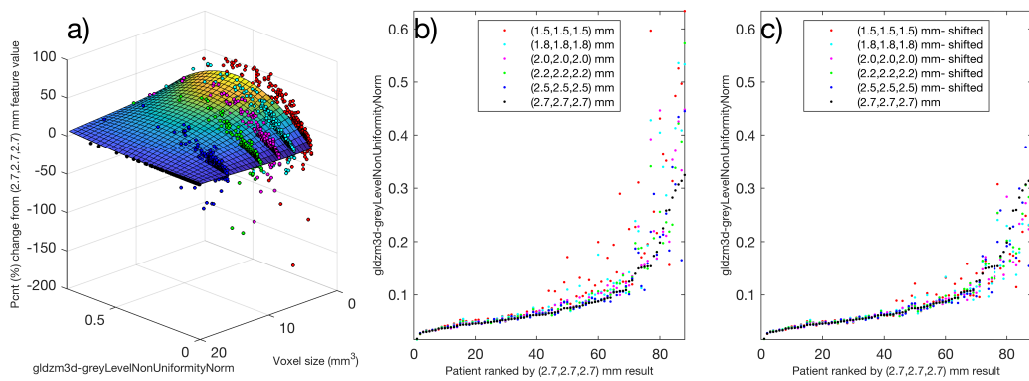

Figure 157: Modelling response: `gldzm3d-greyLevelNonUniformityNorm`

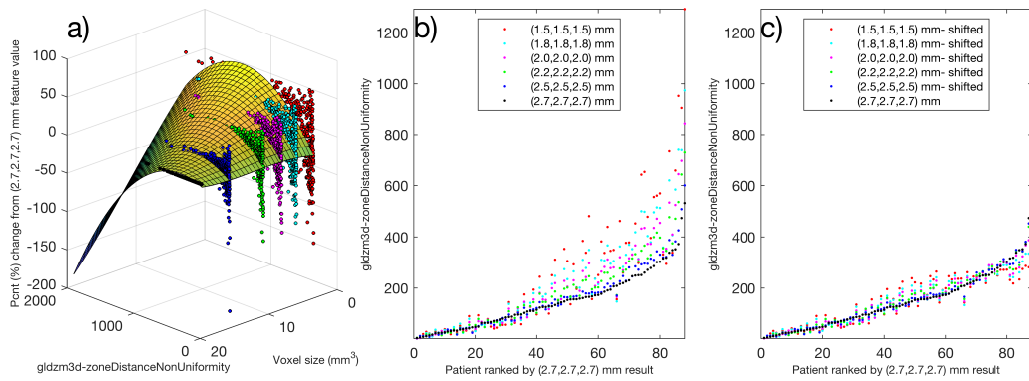

Figure 158: Modelling response: `gldzm3d-zoneDistanceNonUniformity`

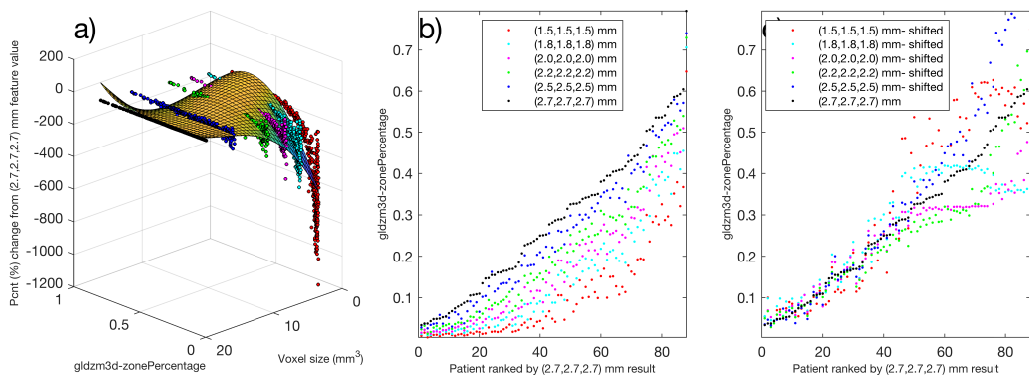

Figure 159: Modelling response: `gldzm3d-zonePercentage`

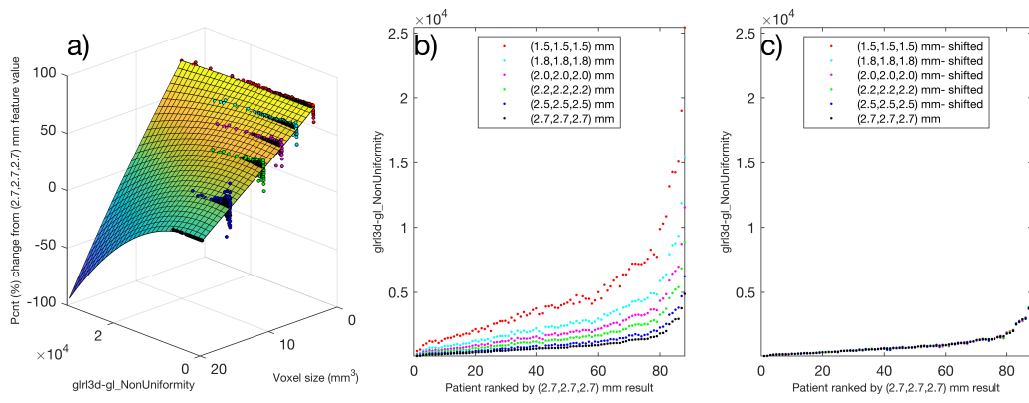

Figure 160: Modelling response: glr3d-gl-NonUniformity

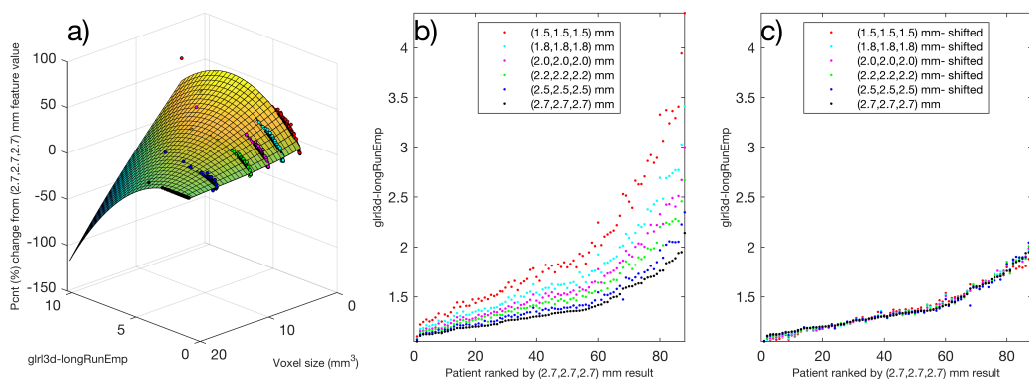

Figure 161: Modelling response: glr3d-longRunEmp



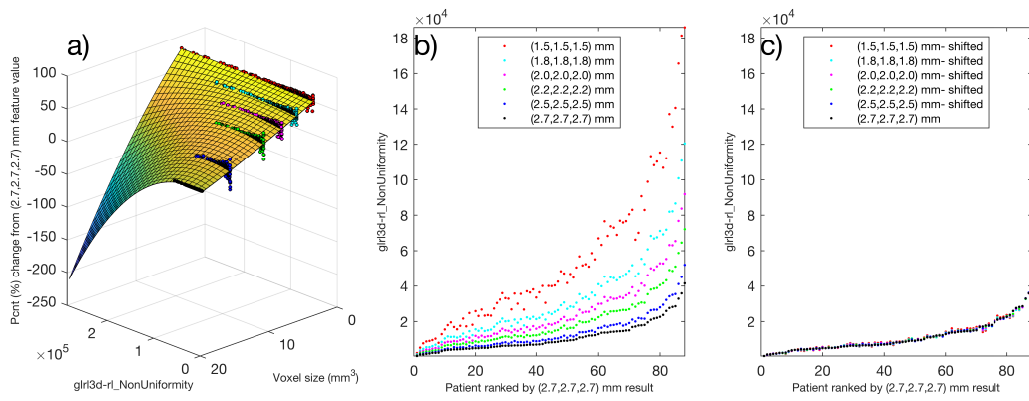

Figure 162: Modelling response: glr13d-rl-NonUniformity

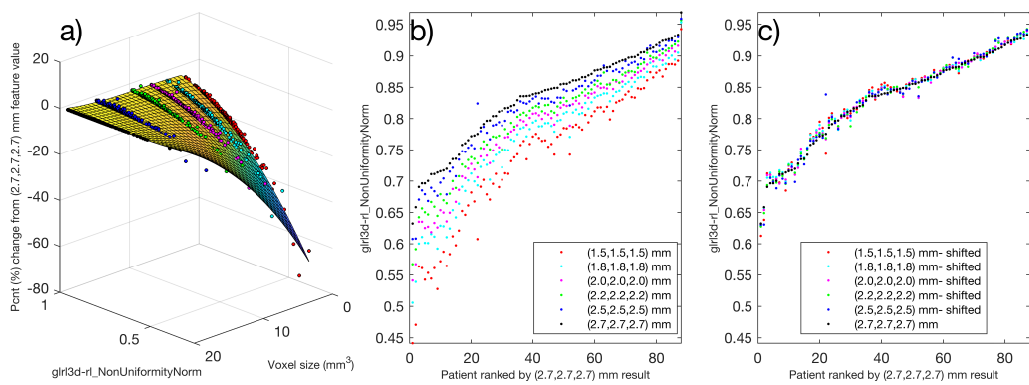

Figure 163: Modelling response: glr13d-rl-NonUniformityNorm

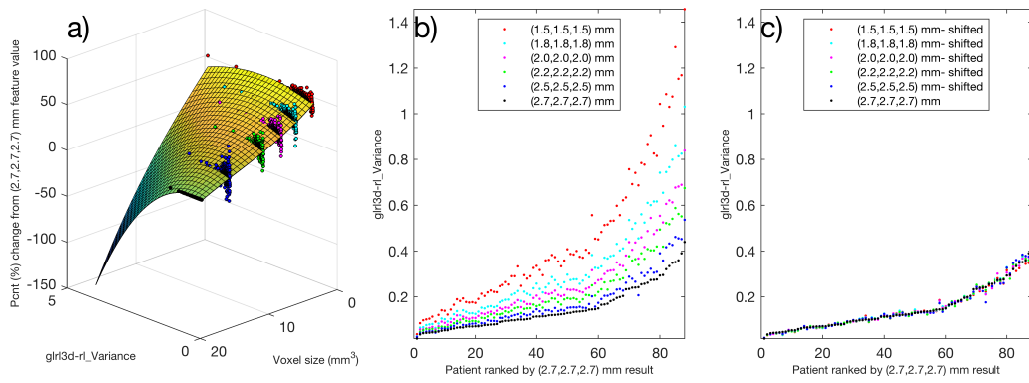

Figure 164: Modelling response: glr13d-rl-Variance

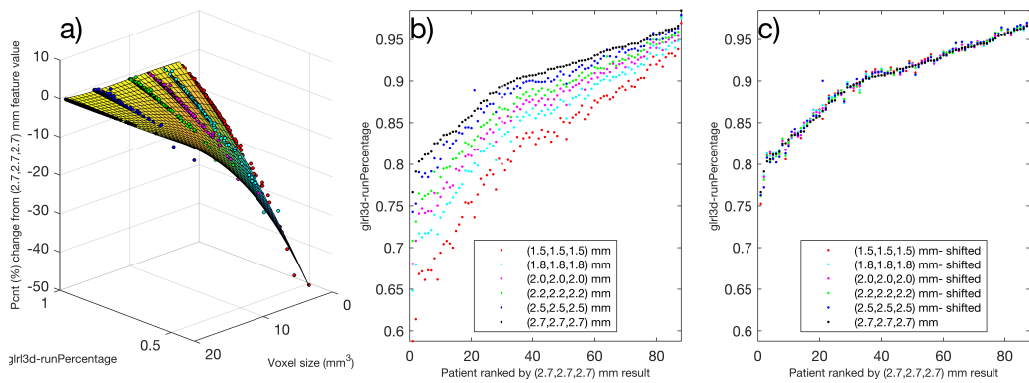

Figure 165: Modelling response: glr13d-runPercentage

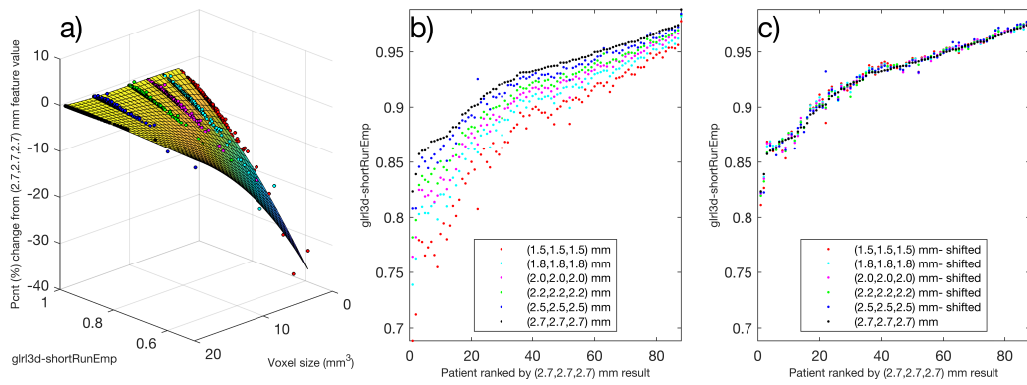

Figure 166: Modelling response: `g13d-shortRunEmp`

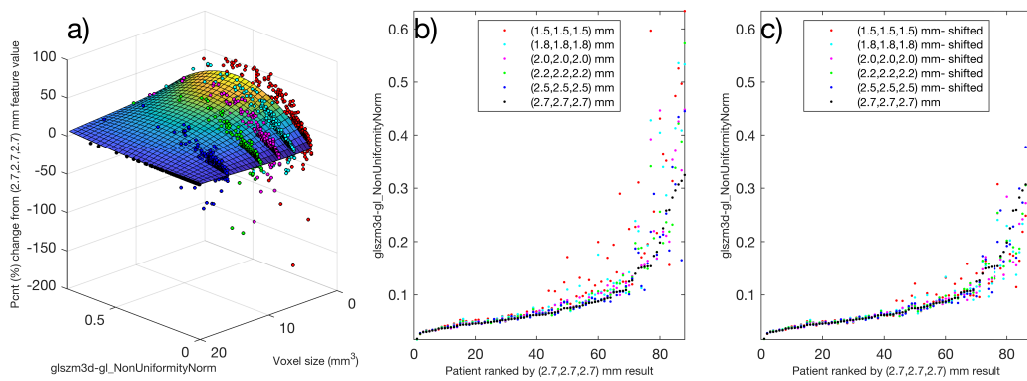

Figure 167: Modelling response: `glszm3d-gl-NonUniformityNorm`

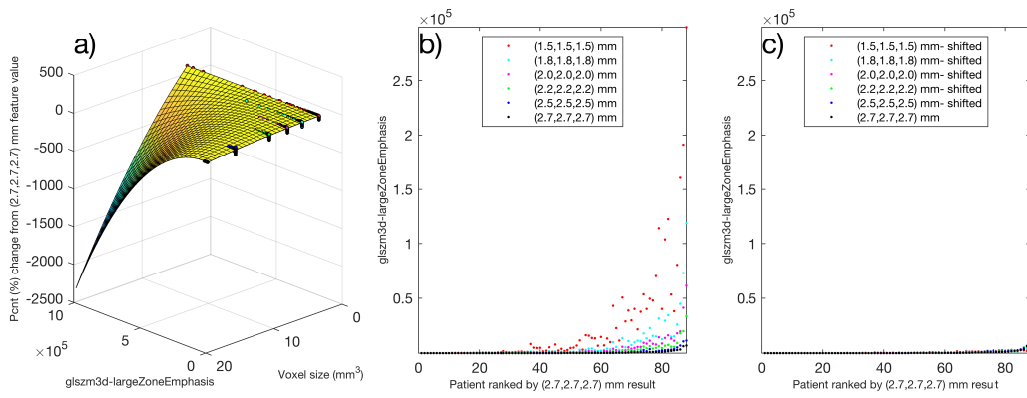

Figure 168: Modelling response: glszm3d-largeZoneEmphasis

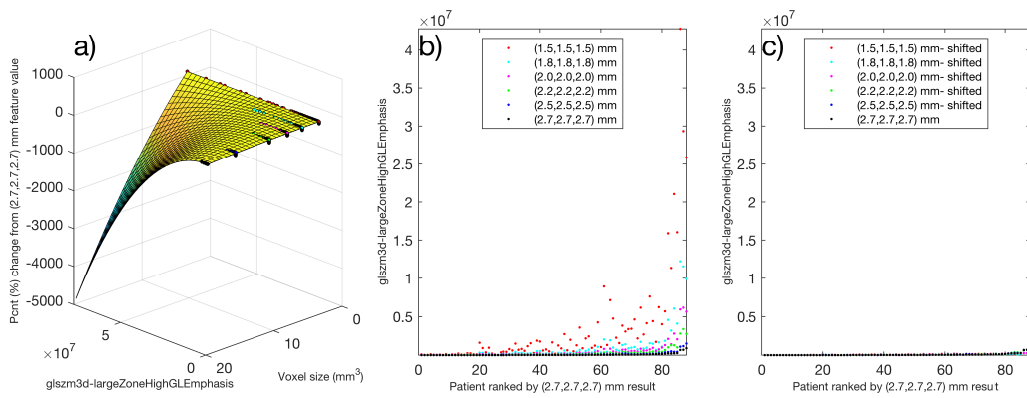

Figure 169: Modelling response: glszm3d-largeZoneHighGLEmphasis

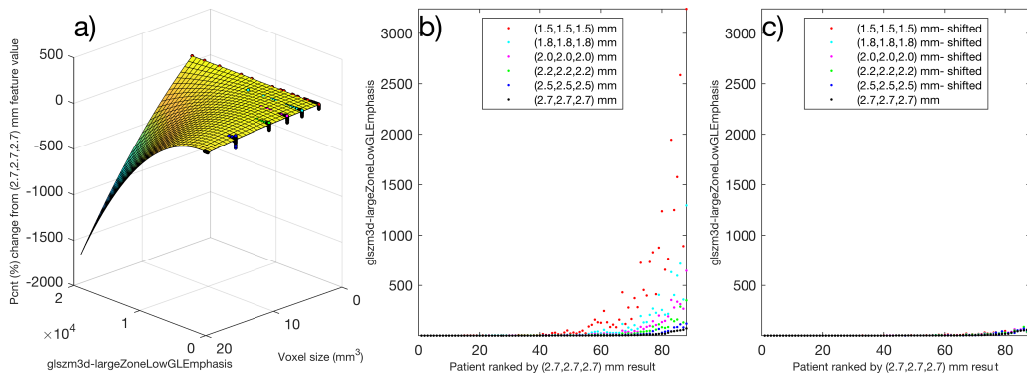

Figure 170: Modelling response: glszm3d-largeZoneLowGLEmphasis

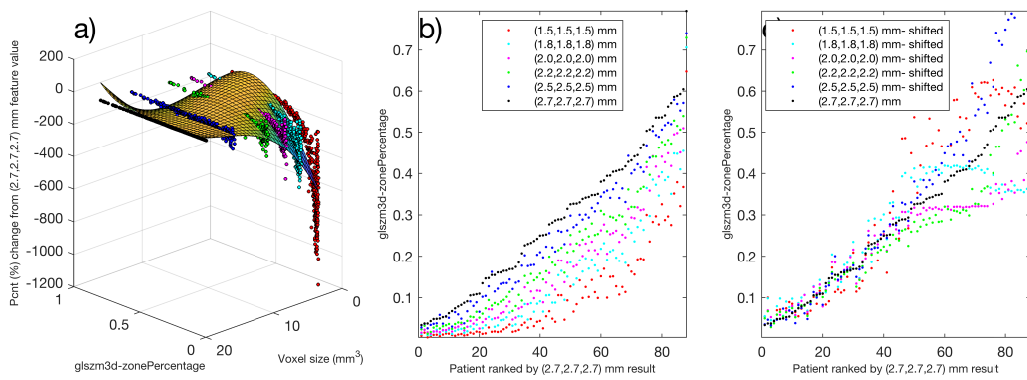

Figure 171: Modelling response: glszm3d-zonePercentage

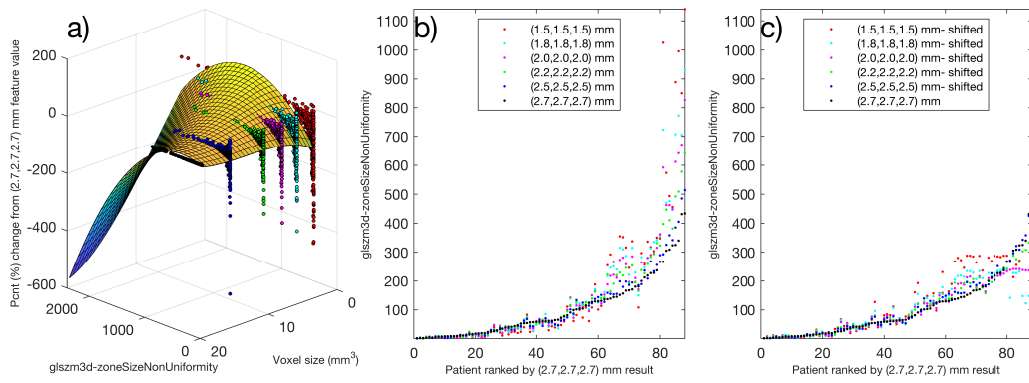

Figure 172: Modelling response: `glszm3d-zoneSizeNonUniformity`

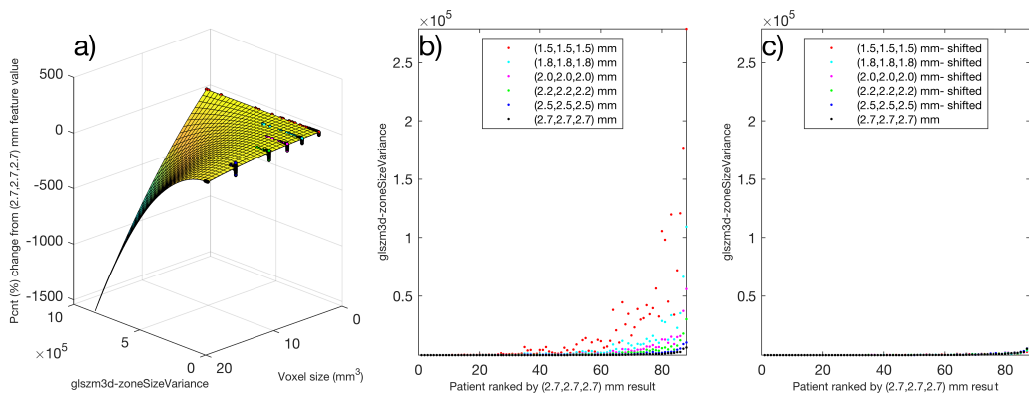

Figure 173: Modelling response: `glszm3d-zoneSizeVariance`

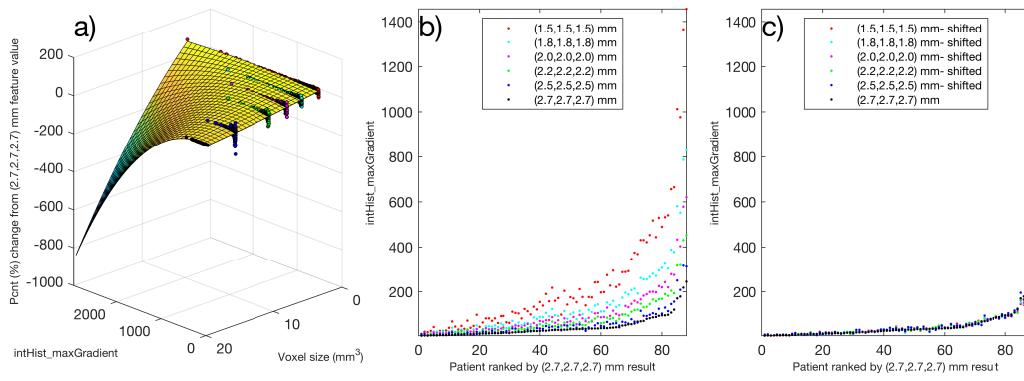

Figure 174: Modelling response: intHist-maxGradient

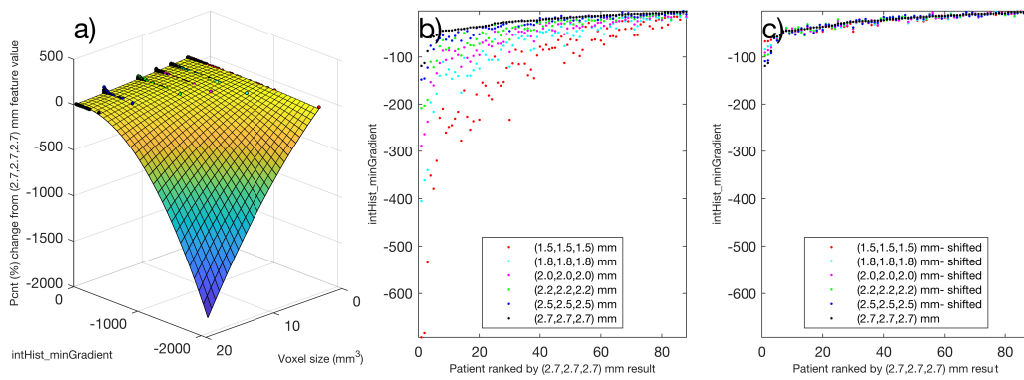

Figure 175: Modelling response: intHist-minGradient

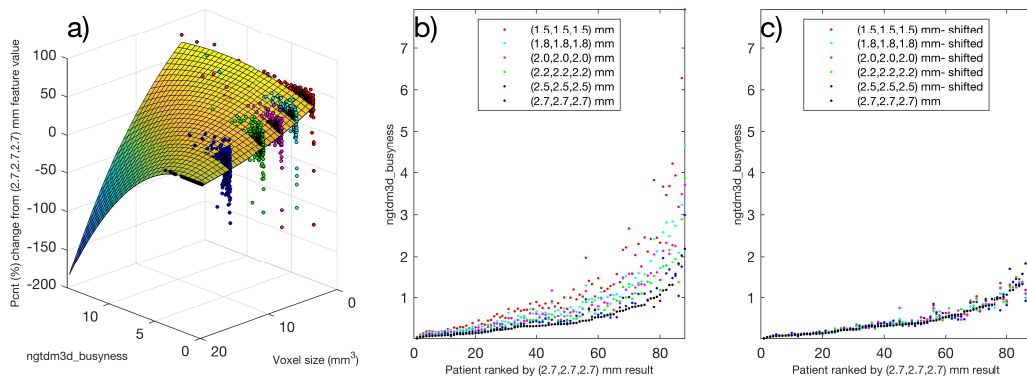

Figure 176: Modelling response: ngtdm3d-busyness

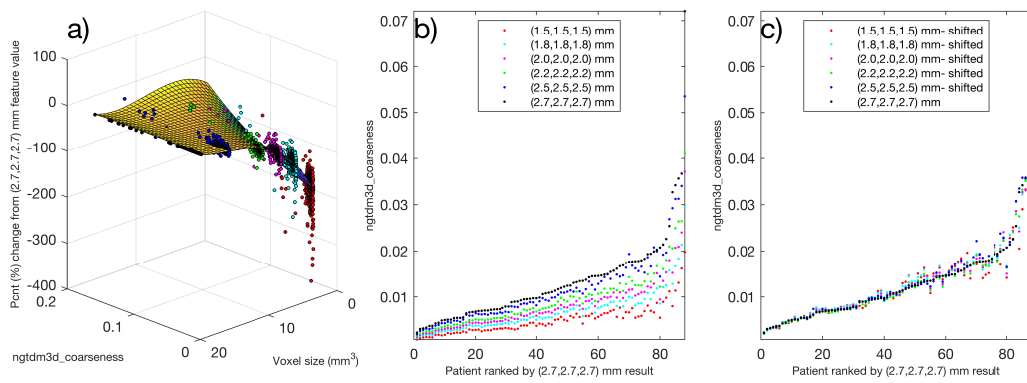

Figure 177: Modelling response: ngtdm3d-coarseness



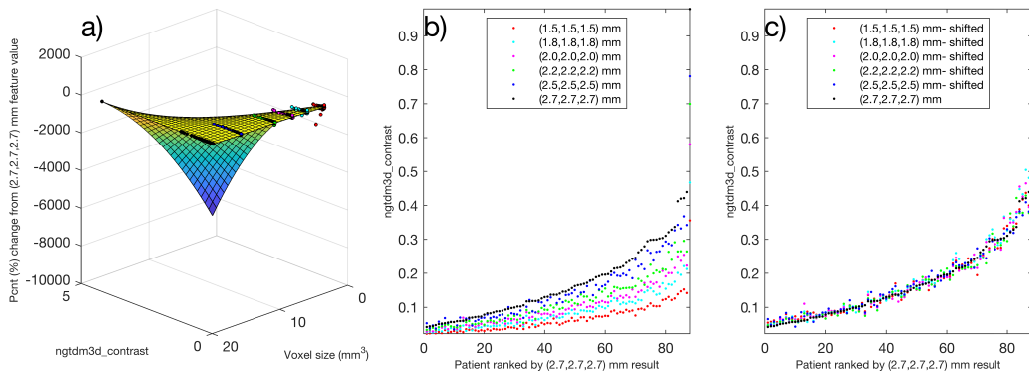

Figure 178: Modelling response: ngtdm3d-contrast

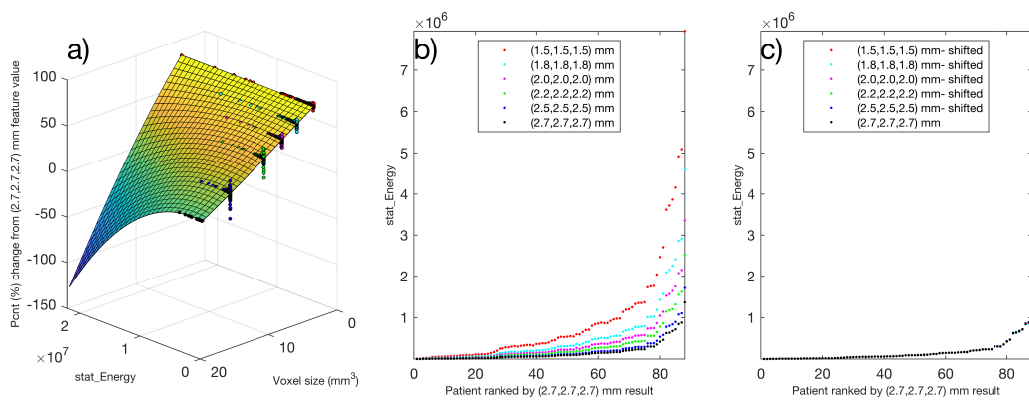

Figure 179: Modelling response: stat-Energy

## References

- [1] K. G. Foley, R. K. Hills, B. Berthon, C. Marshall, C. Parkinson, W. G. Lewis, T. D. Crosby, E. Spezi, and S. A. Roberts, “Development and validation of a prognostic model incorporating texture analysis derived from standardised segmentation of PET in patients with oesophageal cancer,” *European Radiology*, vol. 28, pp. 428–436, jan 2018.
- [2] J. O. Deasy, A. I. Blanco, and V. H. Clark, “CERR: A computational environment for radiotherapy research,” *Medical Physics*, vol. 30, no. 5, pp. 979–985, 2003.
- [3] B. Berthon, C. Marshall, M. Evans, and E. Spezi, “ATLAAS: an automatic decision tree-based learning algorithm for advanced image segmentation in positron emission tomography,” *Physics in Medicine and Biology*, vol. 61, no. 13, pp. 4855–4869, 2016.
- [4] A. Zwanenburg, S. Leger, M. Vallières, and S. Lök, “Image biomarker standardisation initiative,” *arXiv:1612.07003.*, dec 2016.
